# Supplementary material for: Antimalarials with Benzothiophene Moieties as Aminoquinoline Partners
Source: MDPI journal article supplement (doi:10.3390/molecules22030343), 2017-02-24
Supplement: s1 [file s1]

## Supplementary Material – II

### Antimalarials with benzothiophene moieties as aminoquinoline partners

**Jelena Konstantinović<sup>1</sup>, Milica Videnović<sup>2</sup>, Jelena Srbljanović<sup>3</sup>, Olgica Djurković-Djaković<sup>3</sup>, Katarina Bogojević<sup>1</sup>, Richard Sciotti<sup>4</sup> and Bogdan Šolaja<sup>1,\*</sup>**

<sup>1</sup> Faculty of Chemistry, University of Belgrade, Studentski trg 16, P.O. Box 51, 11158, Belgrade, Serbia;

jelena\_konstantinovic@chem.bg.ac.rs (J.K.), bogojevickatarina@gmail.com (K.B.), bsolaja@chem.bg.ac.rs (B.Š.)

<sup>2</sup> Innovation center of the Faculty of Chemistry, Studentski trg 12-16, 11158 Belgrade, Serbia; milica\_videnovic@chem.bg.ac.rs (M.V.)

<sup>3</sup> Institute for Medical Research, University of Belgrade, Dr. Subotića 4, 11129 Belgrade, Serbia;

jelena.srbljanovic@imi.bg.ac.rs (J.S.); olgicadj@imi.bg.ac.rs (O.DjDj.)

<sup>4</sup> Experimental Therapeutics Branch, Walter Reed Army Institute of Research, Silver Spring, Maryland 20910, United States; richard.j.sciotti.civ@mail.mil (R.S.)

\* Correspondence: bsolaja@chem.bg.ac.rs; Tel.: +381-11-263-86-06

**Table of contents**

|                                             |               |
|---------------------------------------------|---------------|
| <b>NMR spectra of synthesized compounds</b> | <b>II-S3</b>  |
| <b>HPLC analyses for purity</b>             | <b>II-S31</b> |

***N*-(1-benzothien-2-ylmethyl)-*N'*-quinolin-4-ylpropane-1,3-diamine (8)**

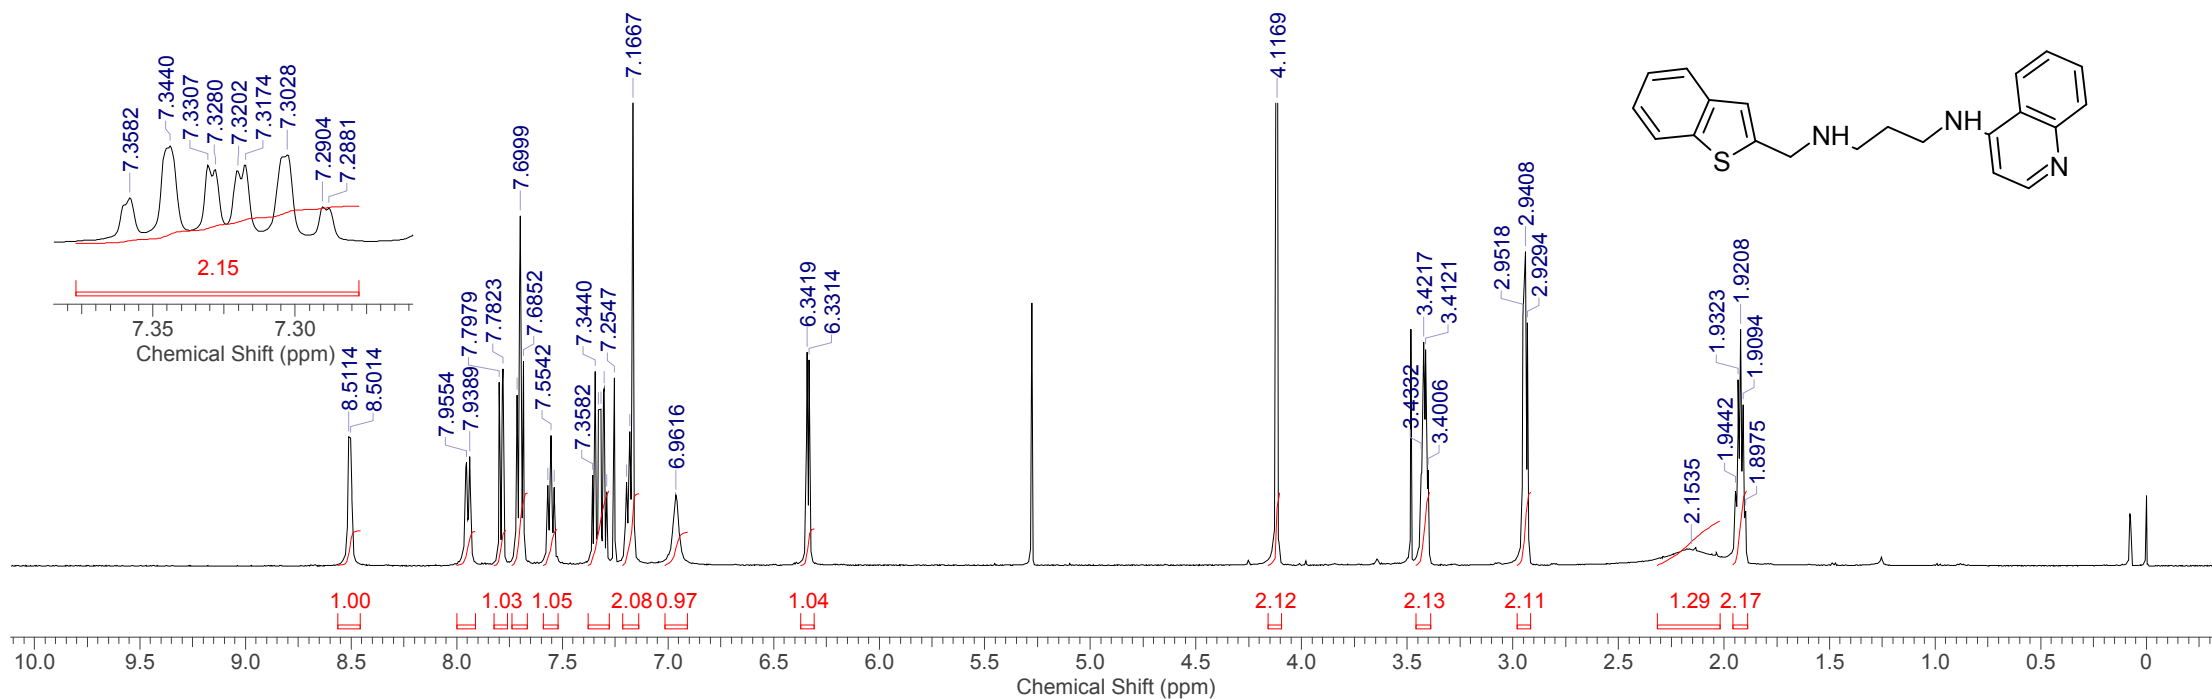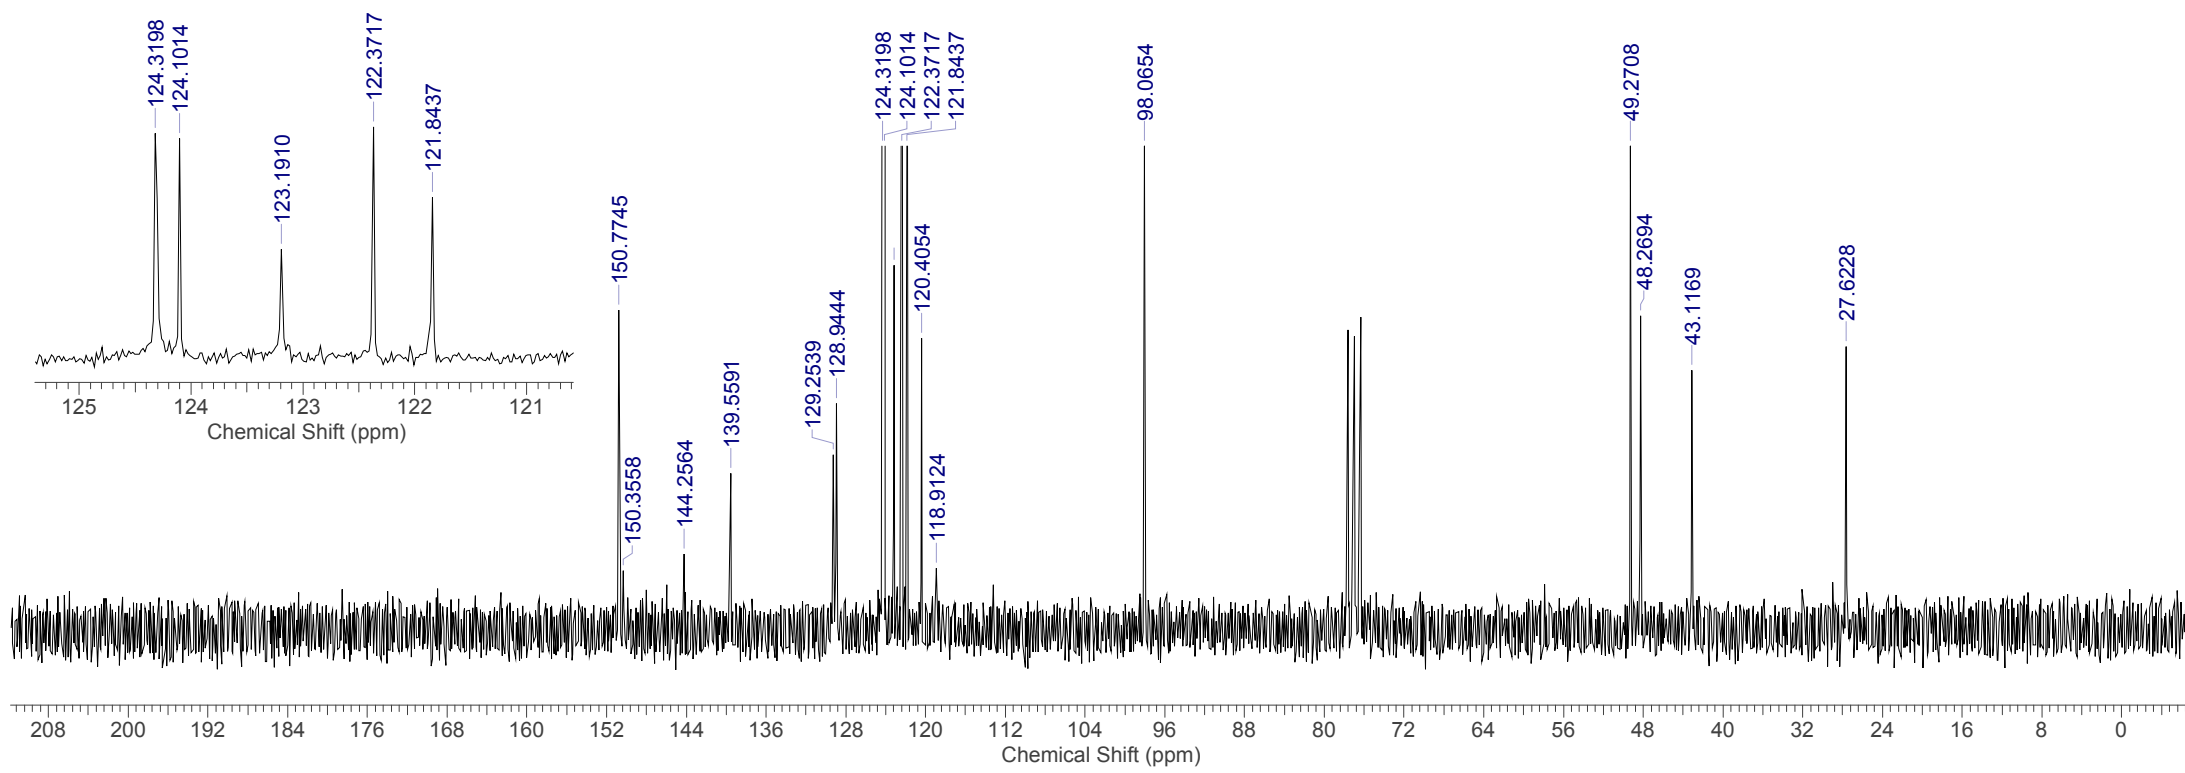

***N*-(1-benzothien-2-ylmethyl)-*N'*-quinolin-4-ylbutane-1,4-diamine (9)**

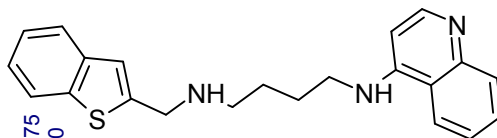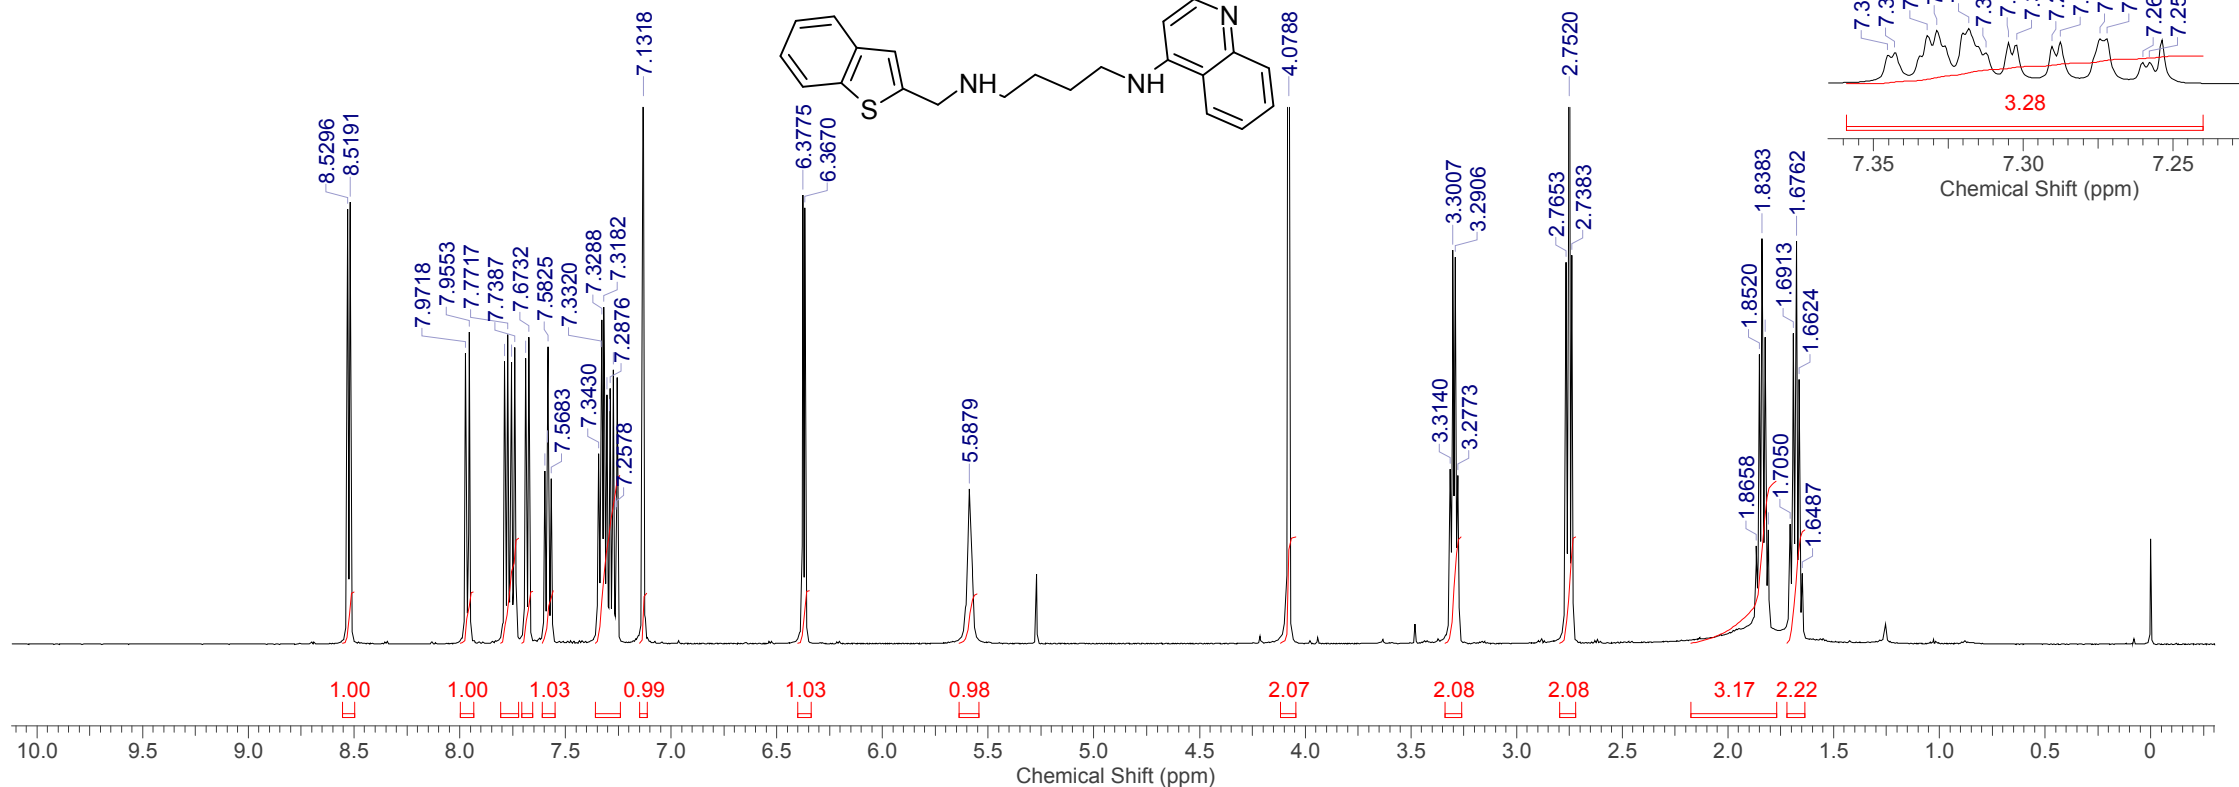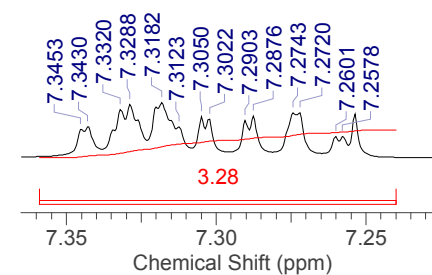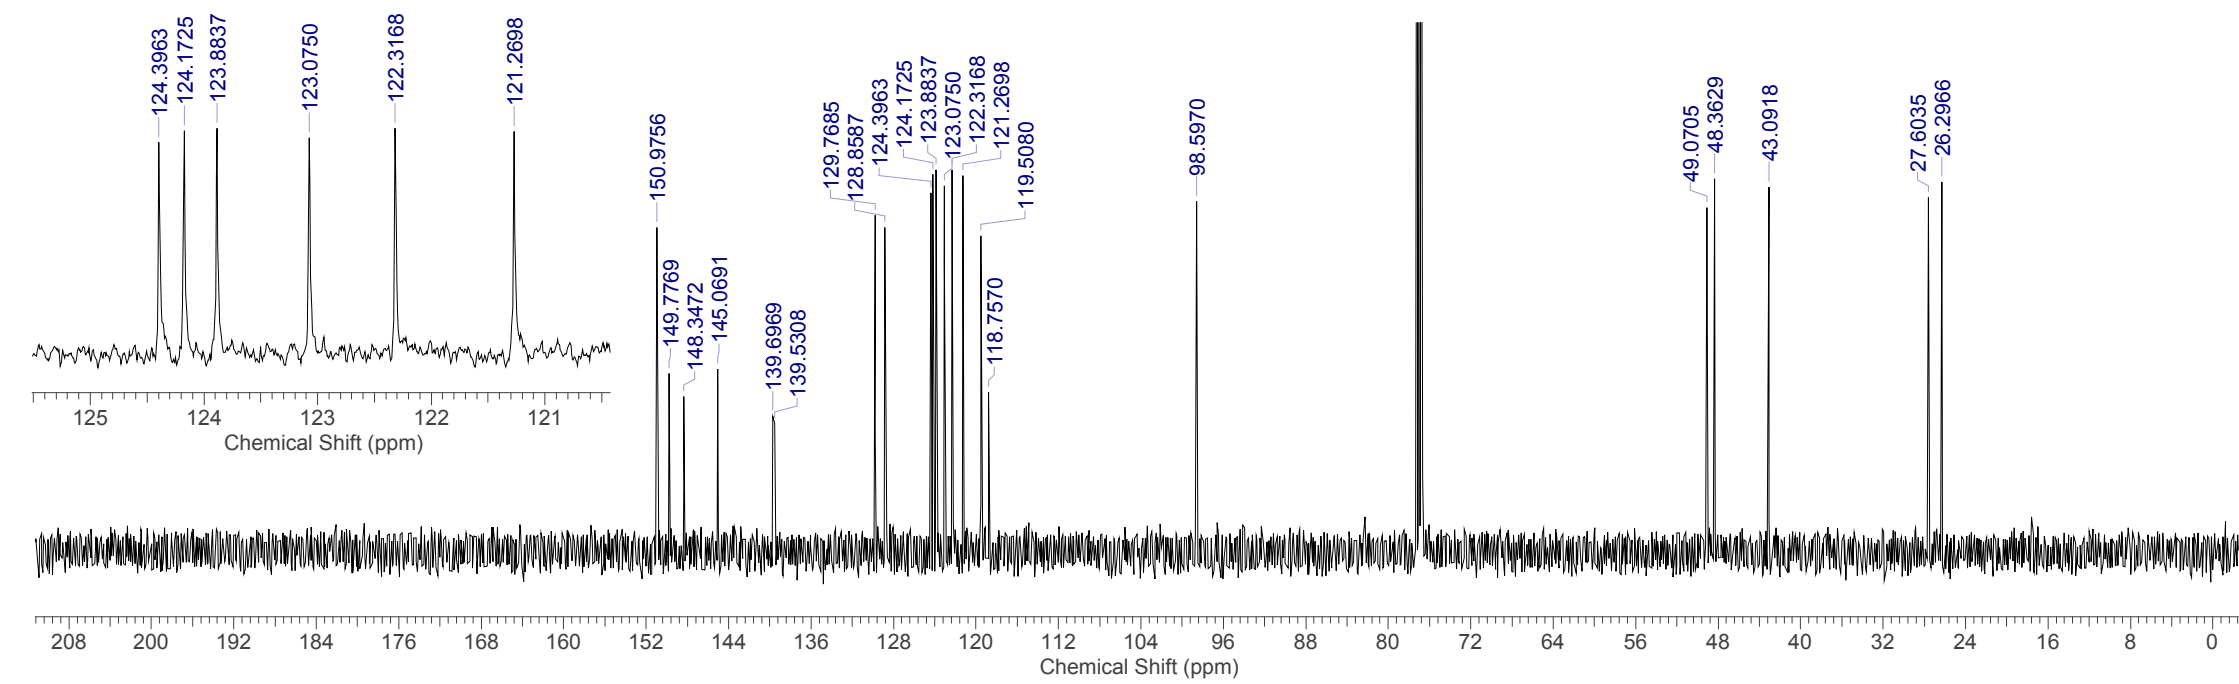

***N*-[(6-fluoro-1-benzothien-3-yl)methyl]-*N'*-quinolin-4-ylpropane-1,3-diamine (12)**

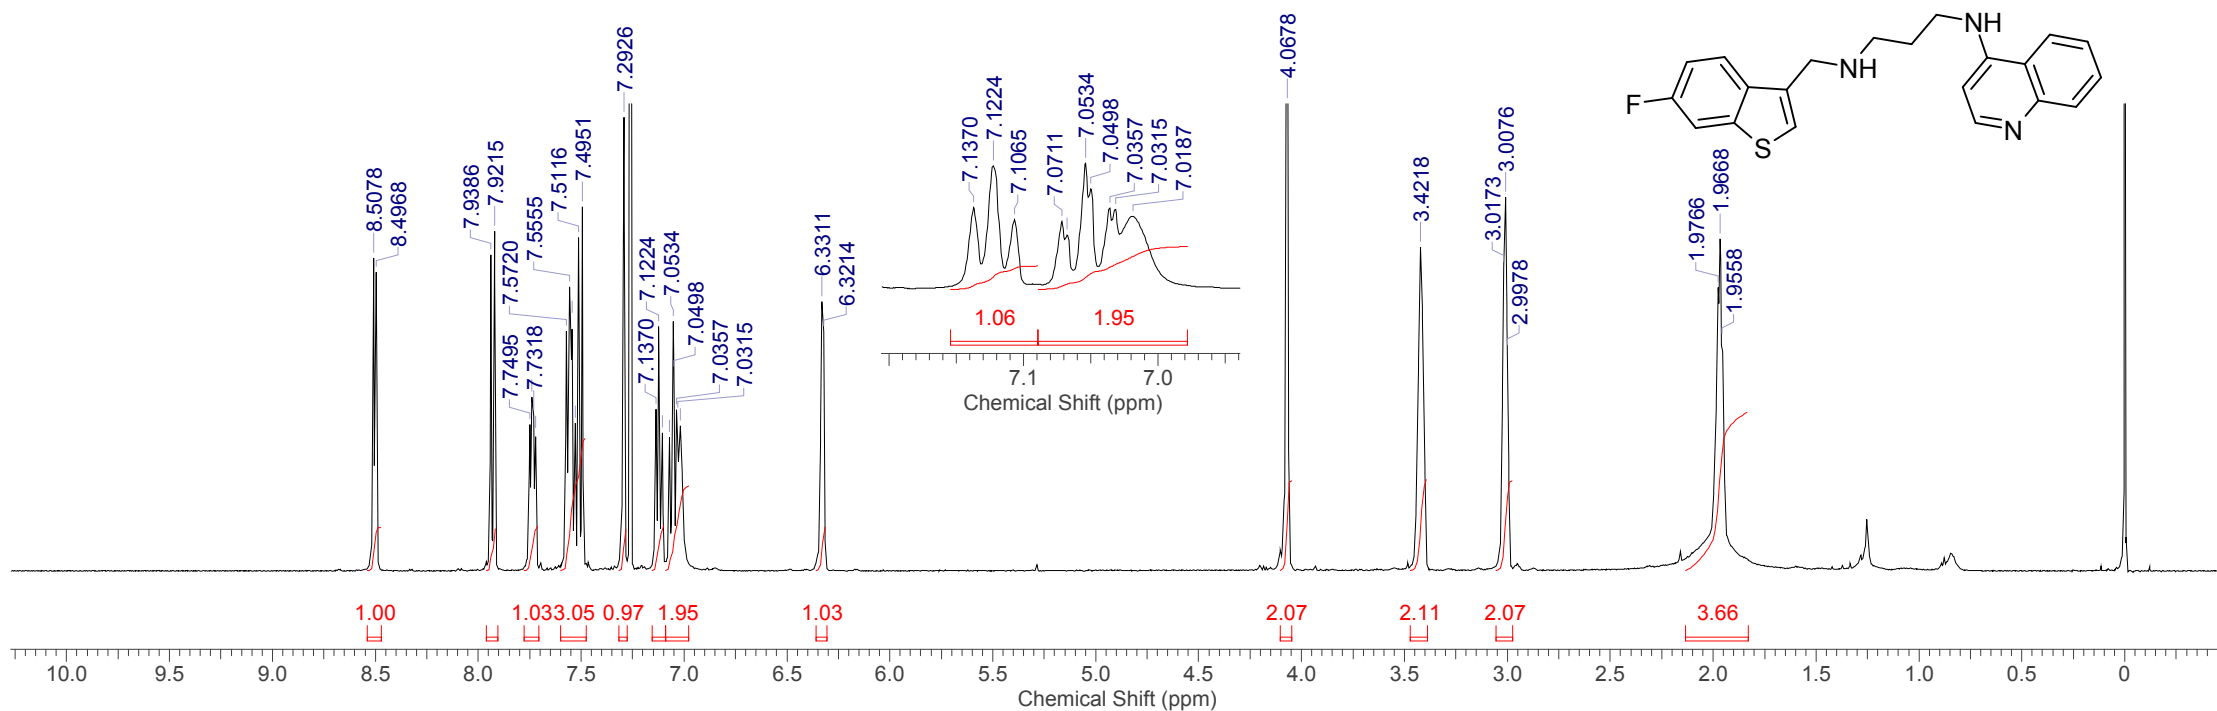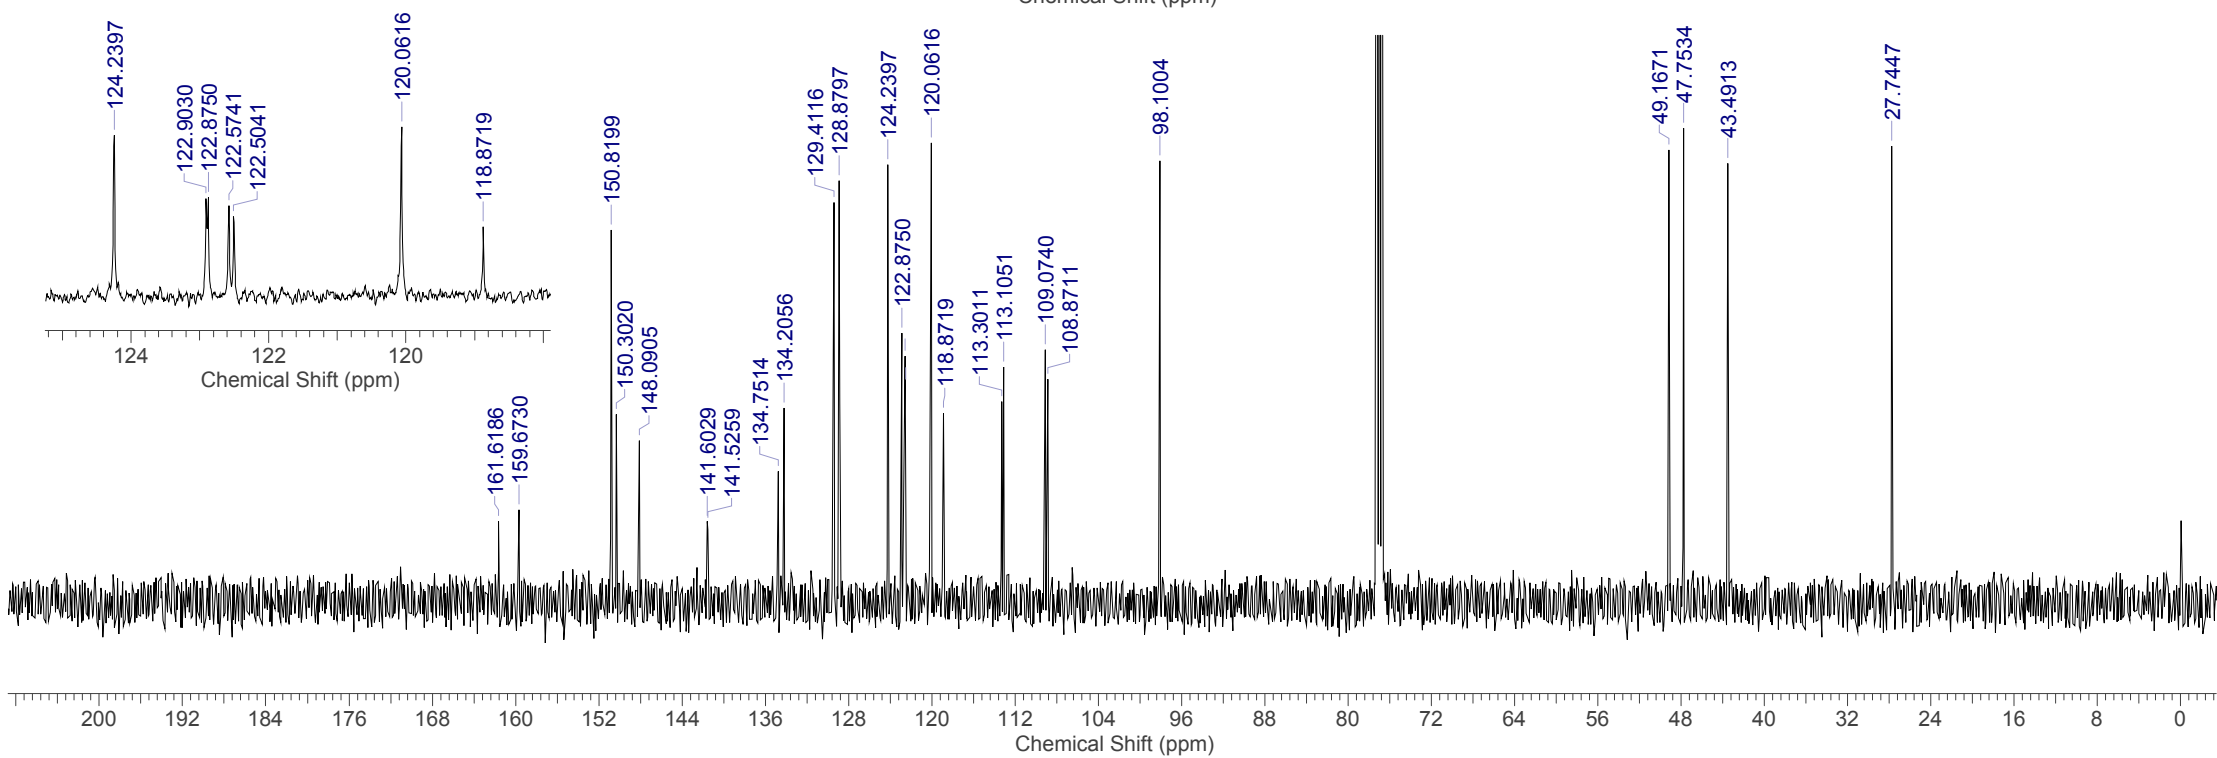

***N*-[(5-fluoro-1-benzothien-3-yl)methyl]- *N'*-quinolin-4-ylbutane-1,4-diamine (13)**

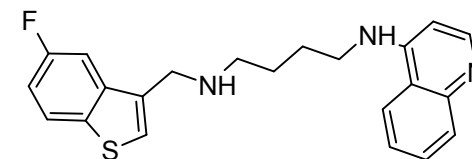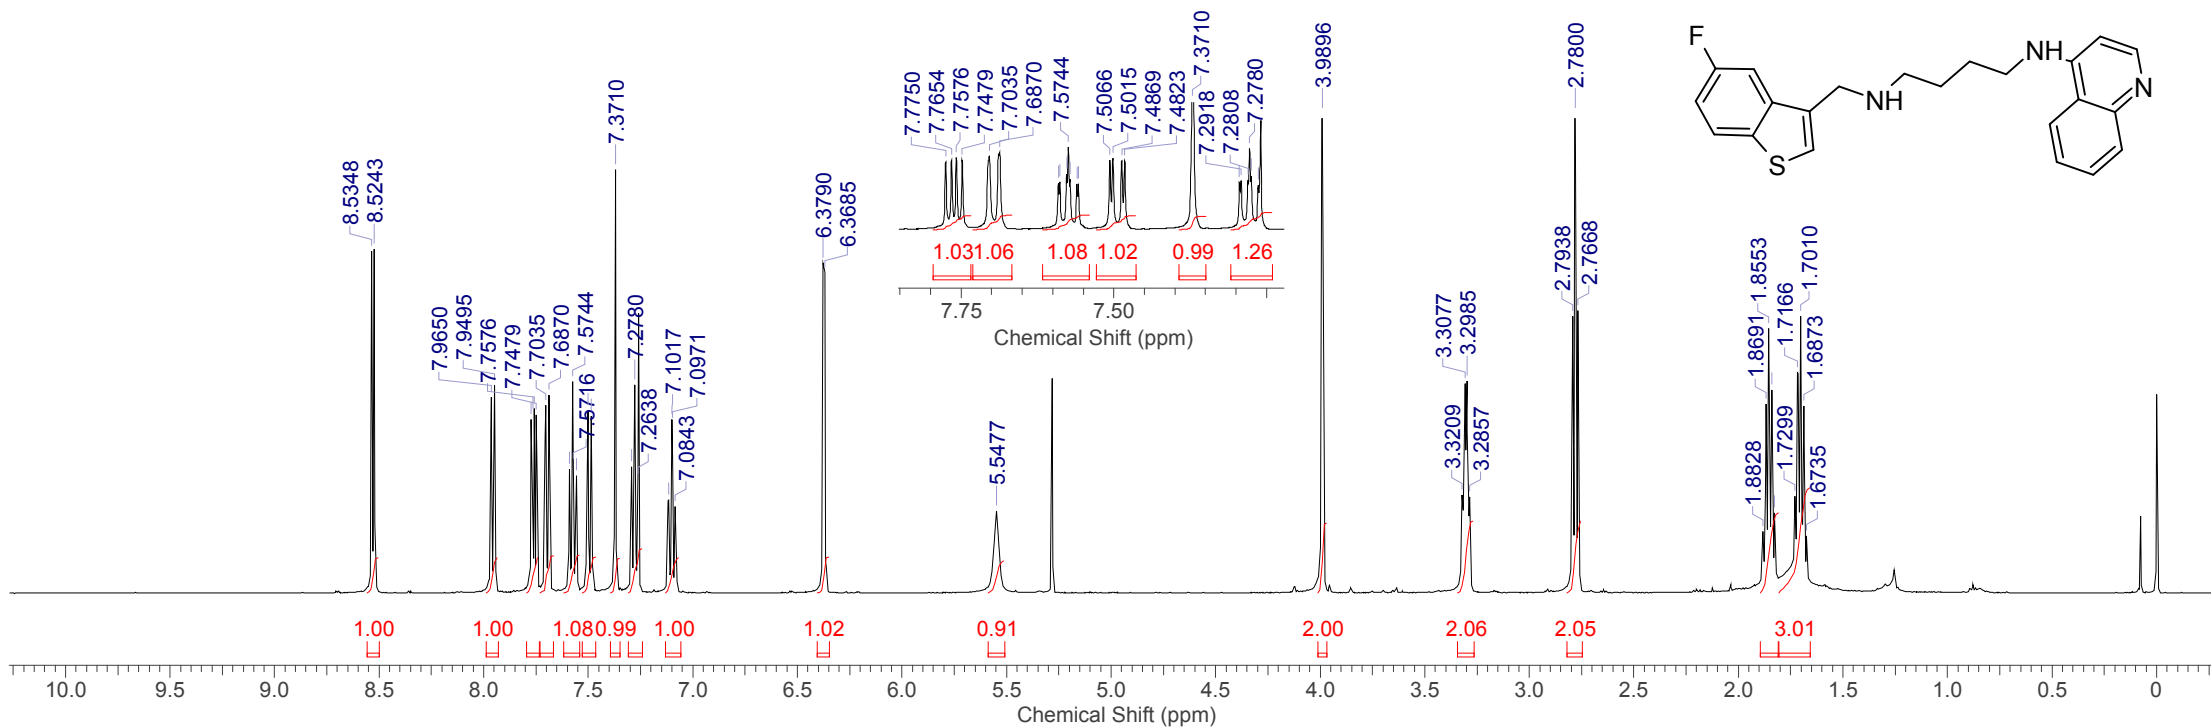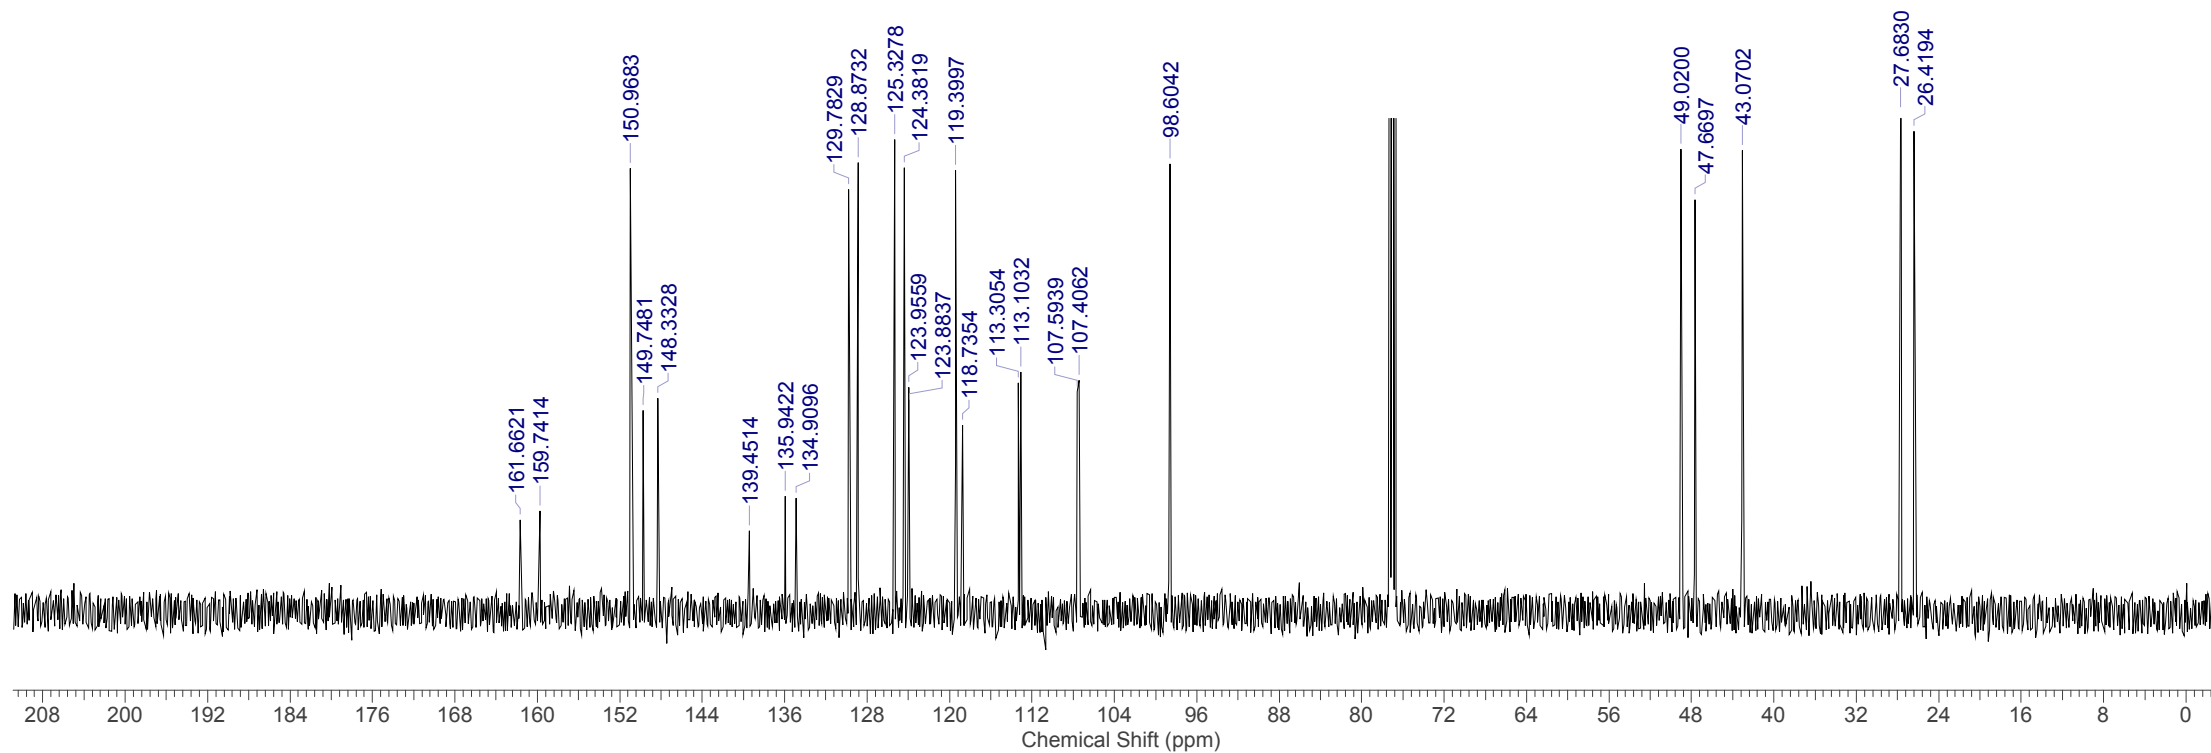

***N*-[4-(5-fluoro-1-benzothien-3-yl)benzyl]-*N'*-quinolin-4-ylpropane-1,3-diamine (23)**

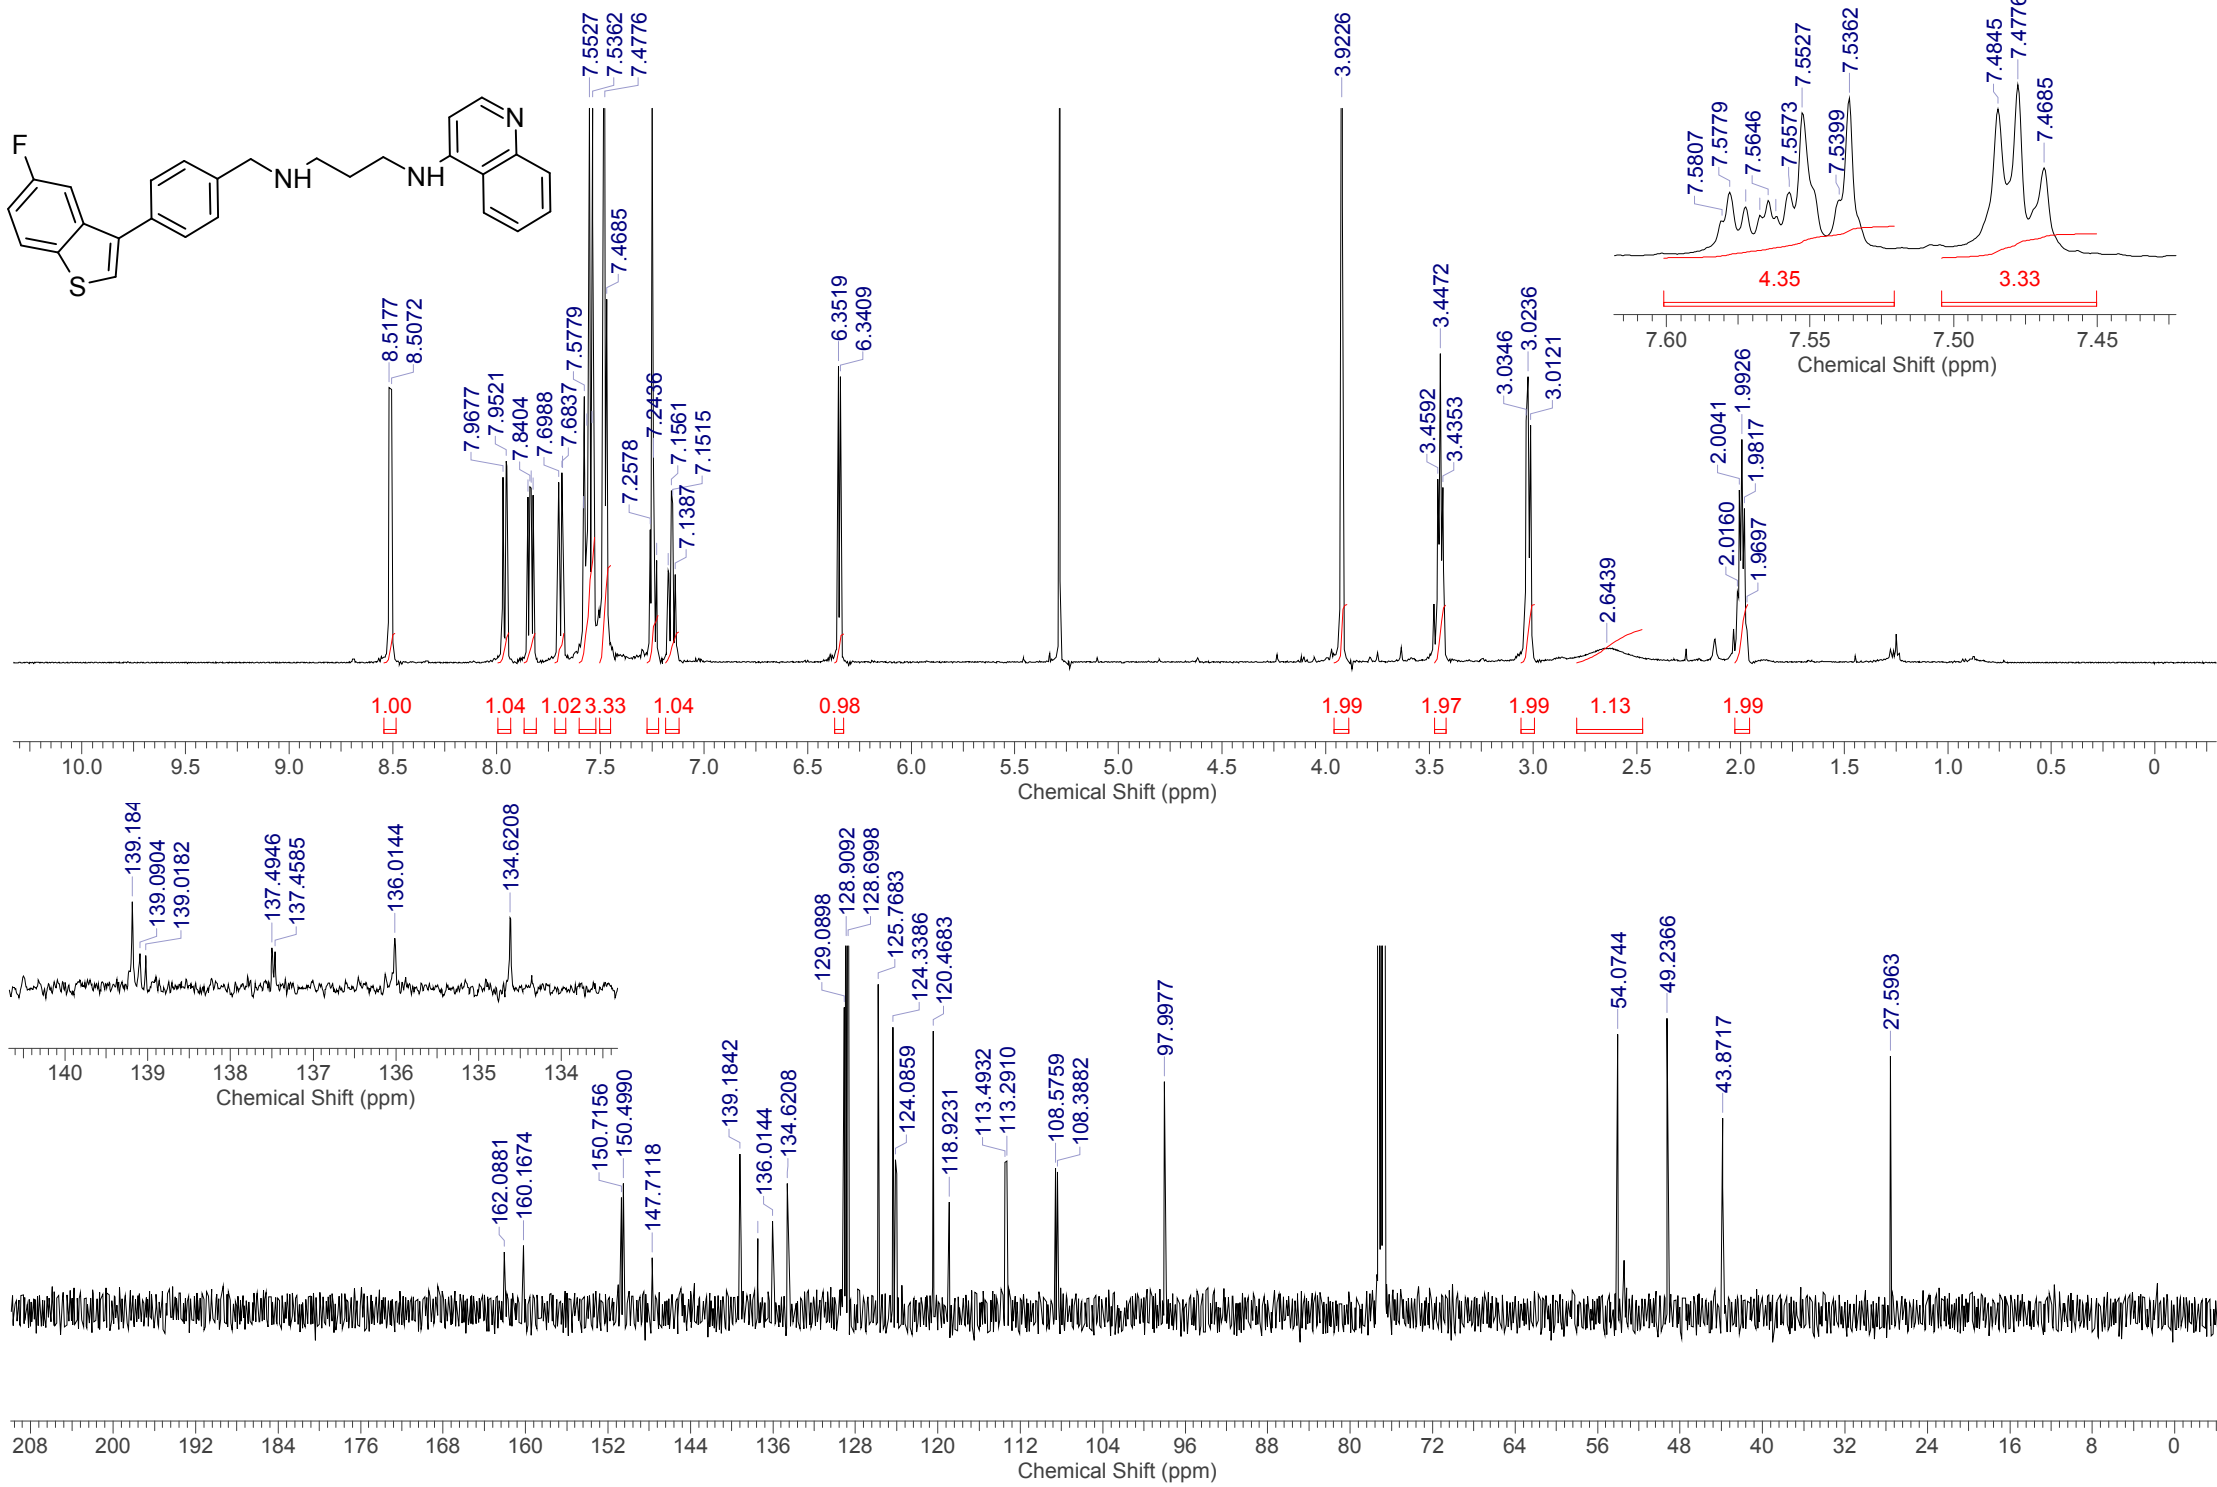

***N*-[4-(5-fluoro-1-benzothien-3-yl)benzyl]-*N'*-quinolin-4-ylhexane-1,6-diamine (24)**

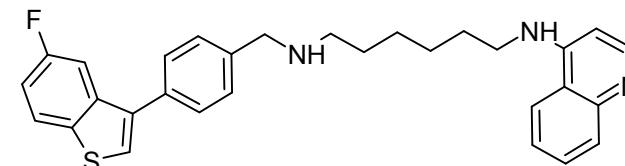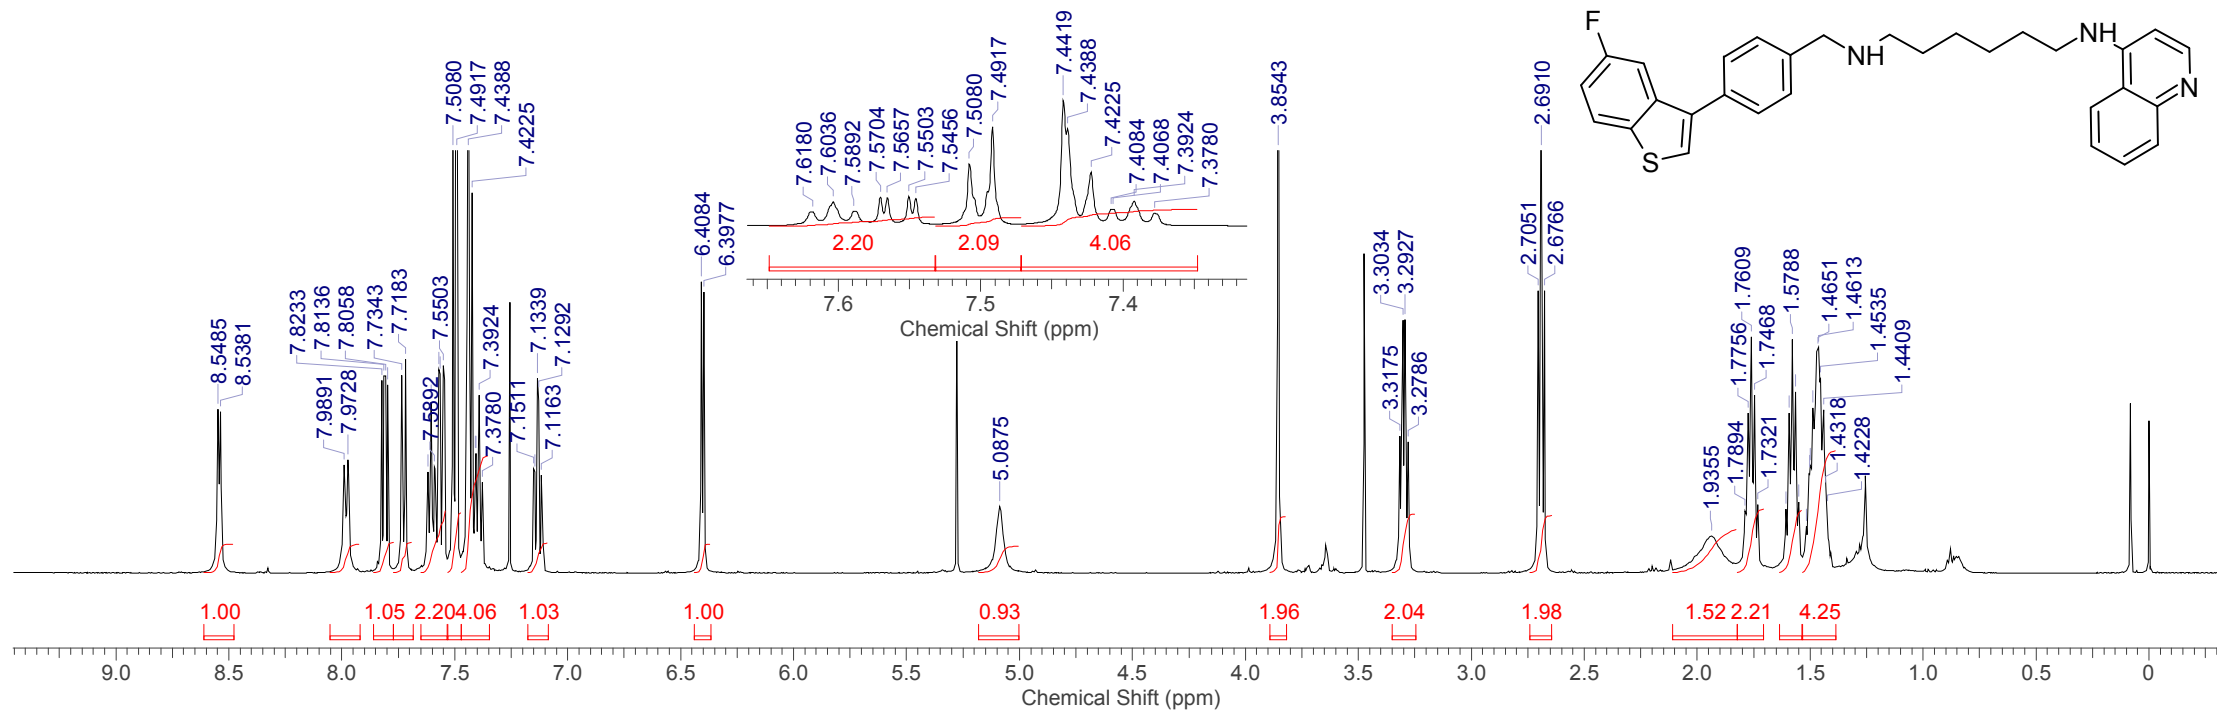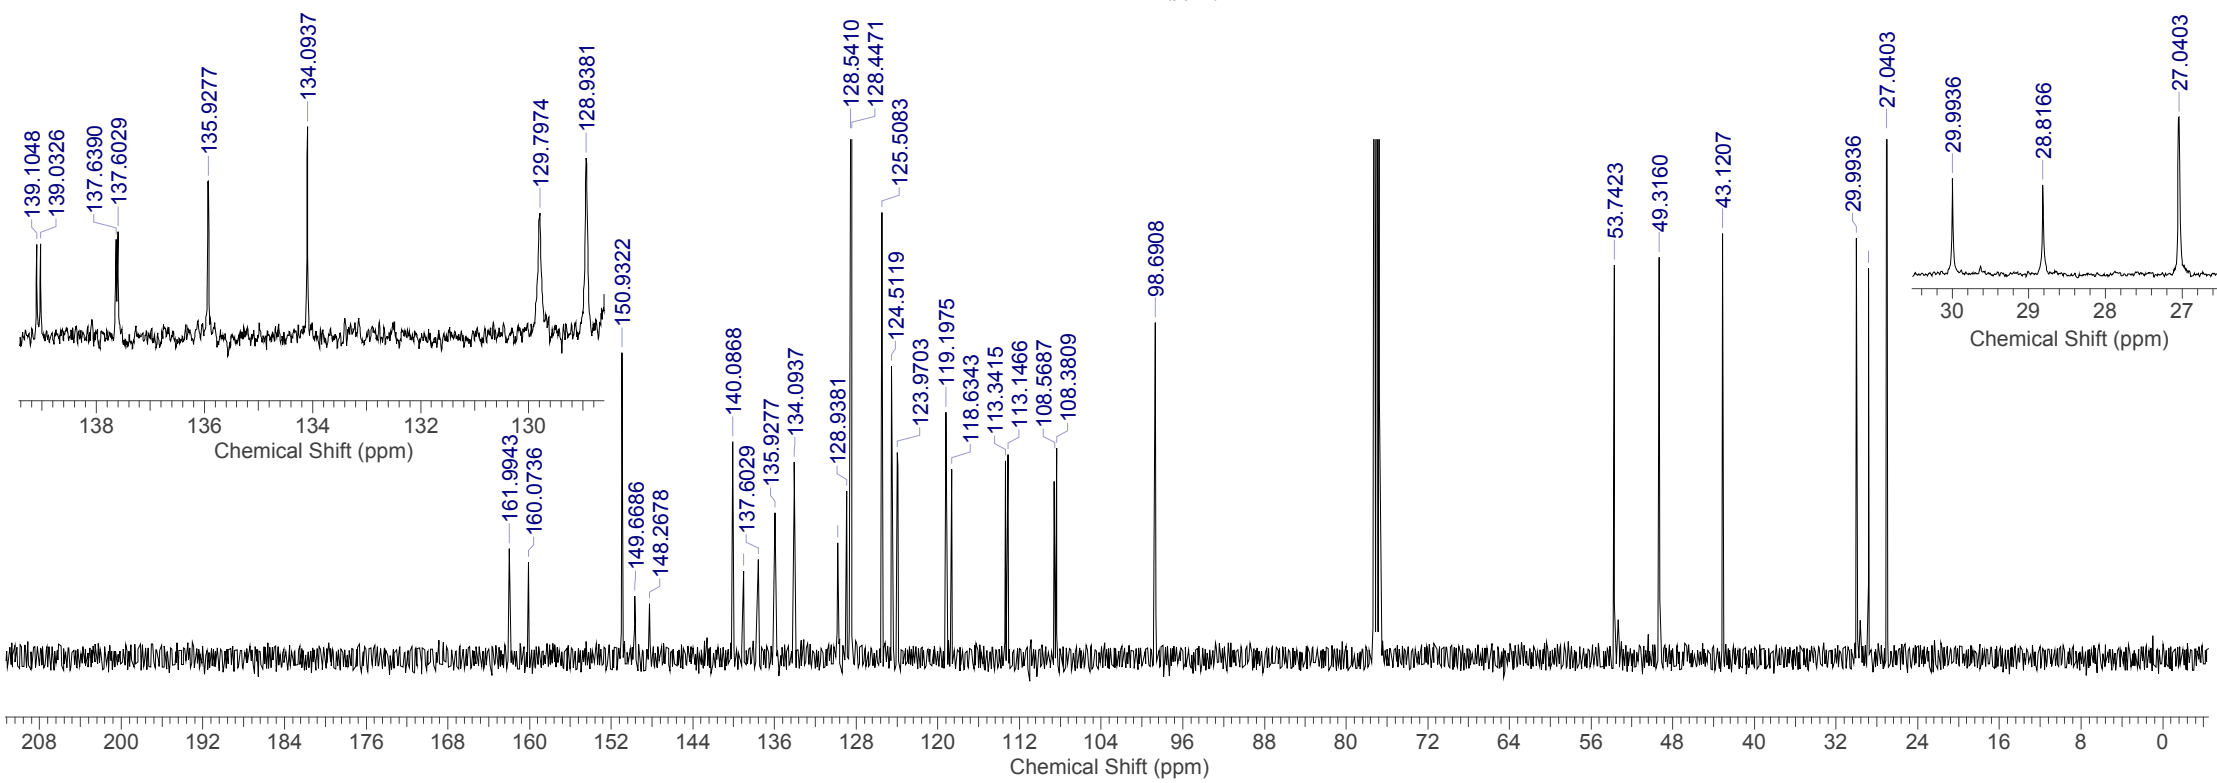



***N*<sup>4</sup>-(7-chloroquinolin-4-yl)-*N*<sup>1</sup>-[4-(5-fluoro-1-benzothien-3-yl)benzyl]pentane-1,4-diamine (25)**

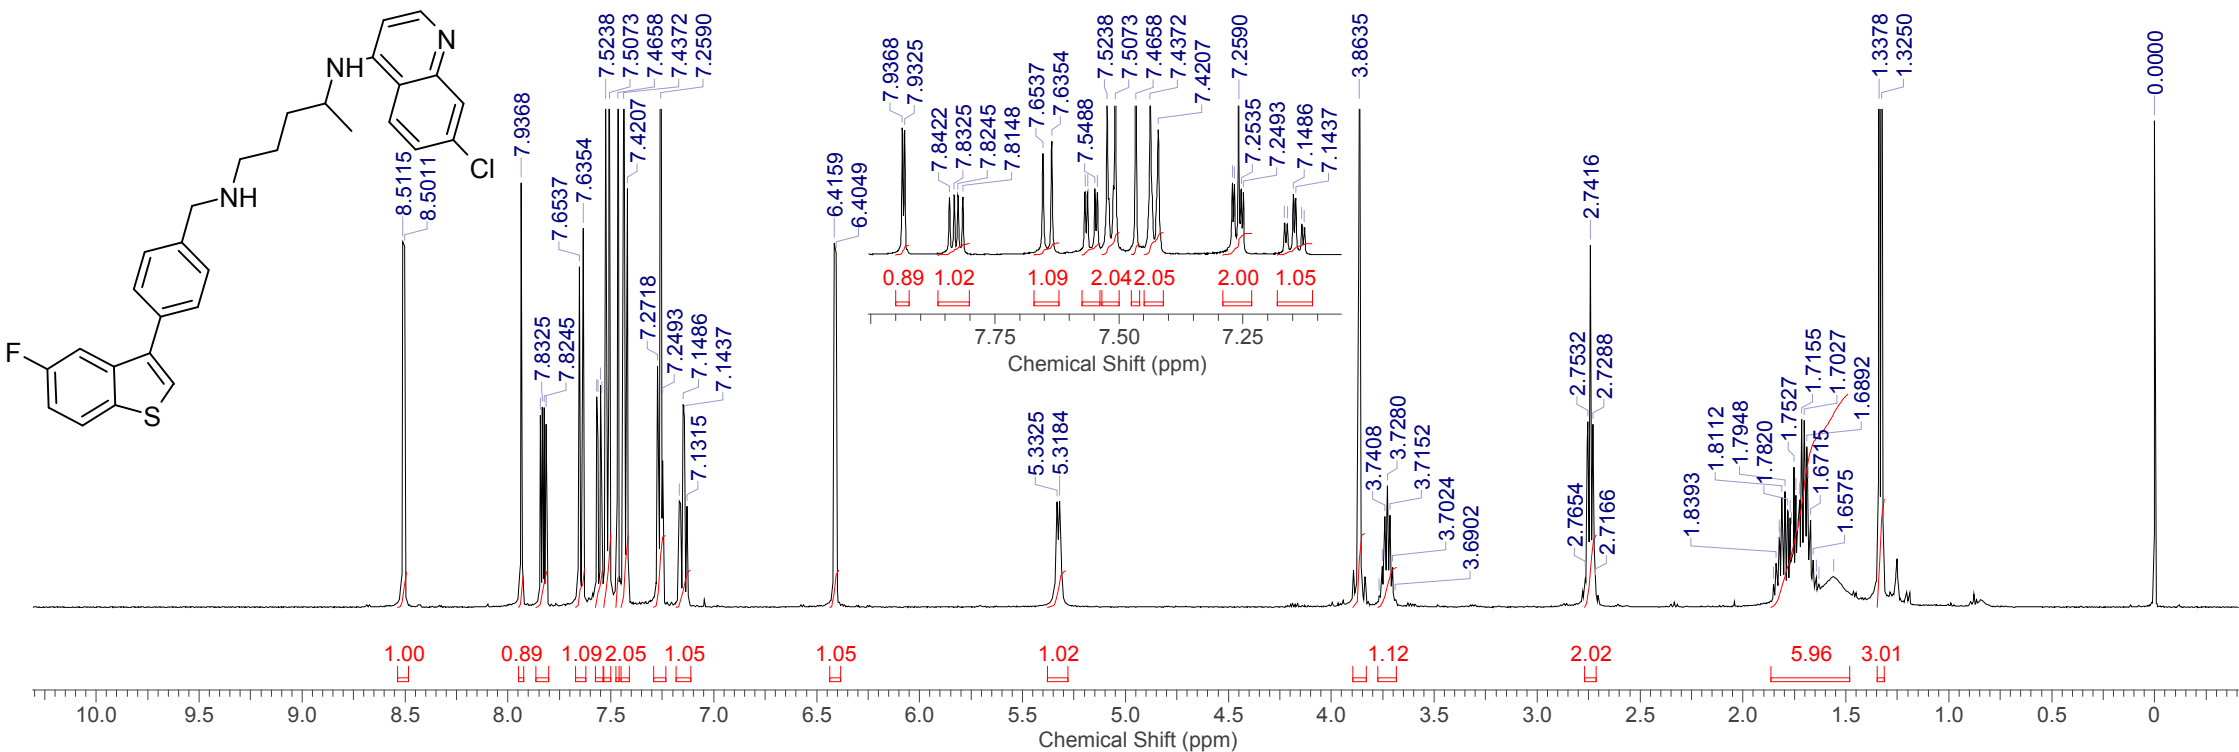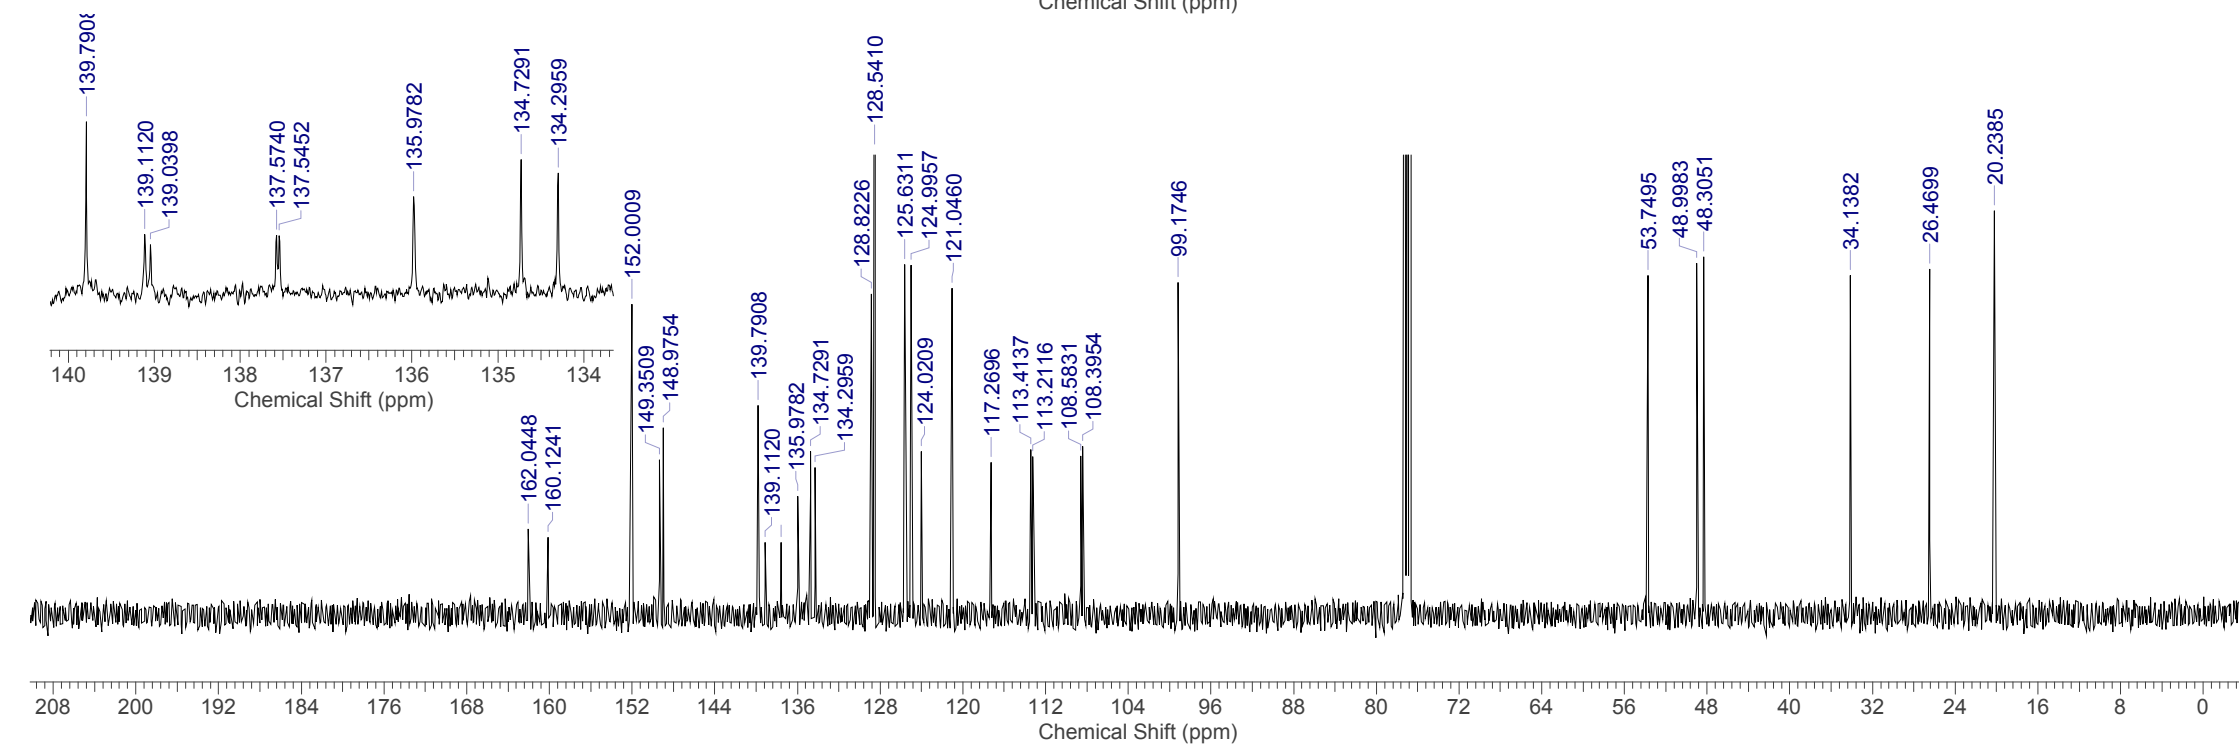

***N*<sup>1</sup>-[4-(5-fluoro-1-benzothien-3-yl)benzyl]-*N*<sup>4</sup>-quinolin-4-ylpentane-1,4-diamine (26)**

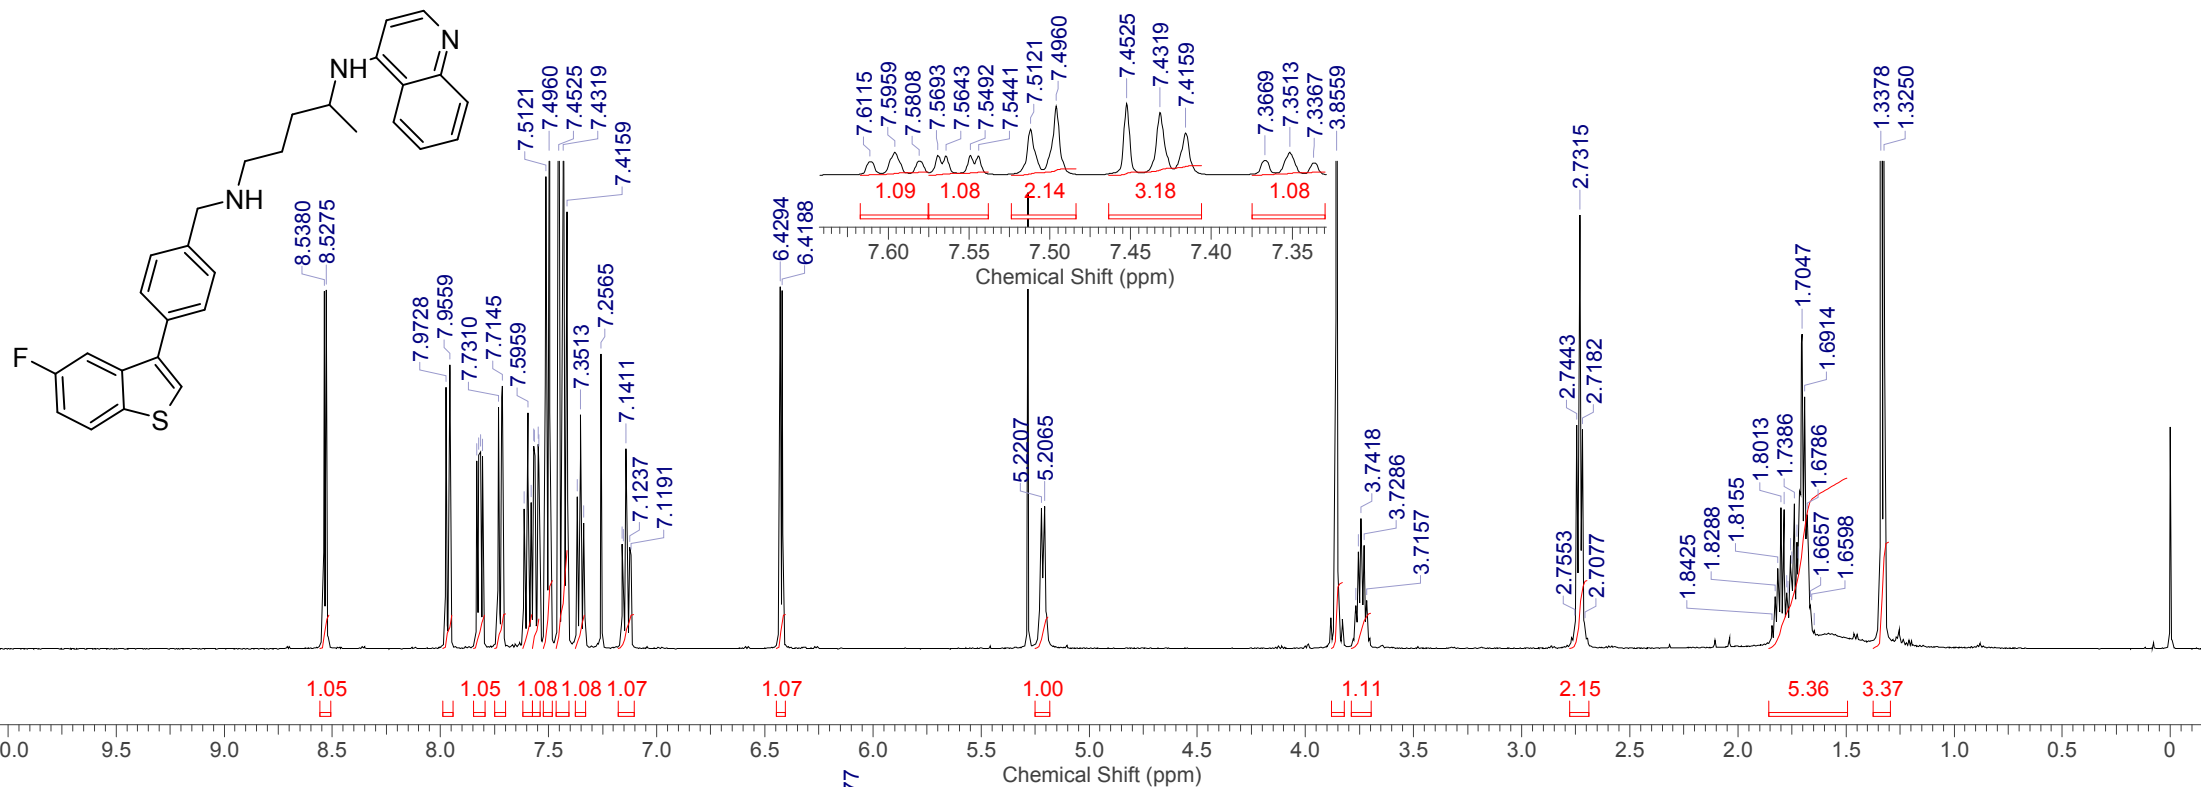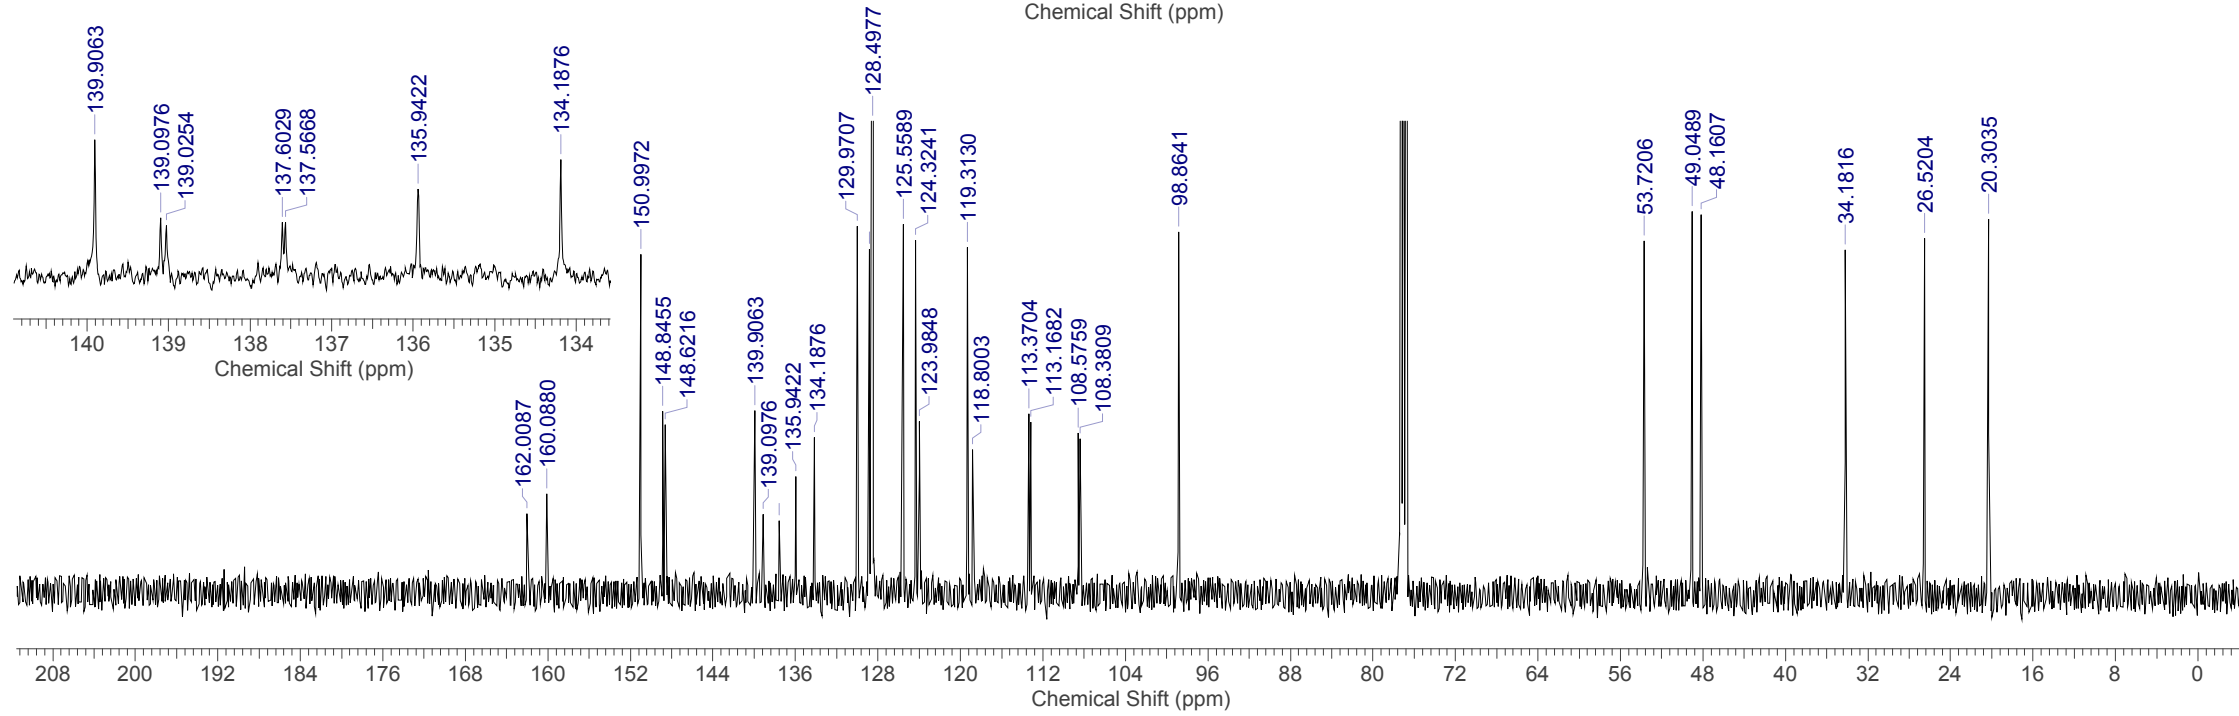

***N*<sup>1</sup>-[4-(5-fluoro-1-benzothien-3-yl)benzyl]-*N*<sup>1</sup>-methyl-*N*<sup>4</sup>-quinolin-4-ylpentane-1,4-diamine (27)**

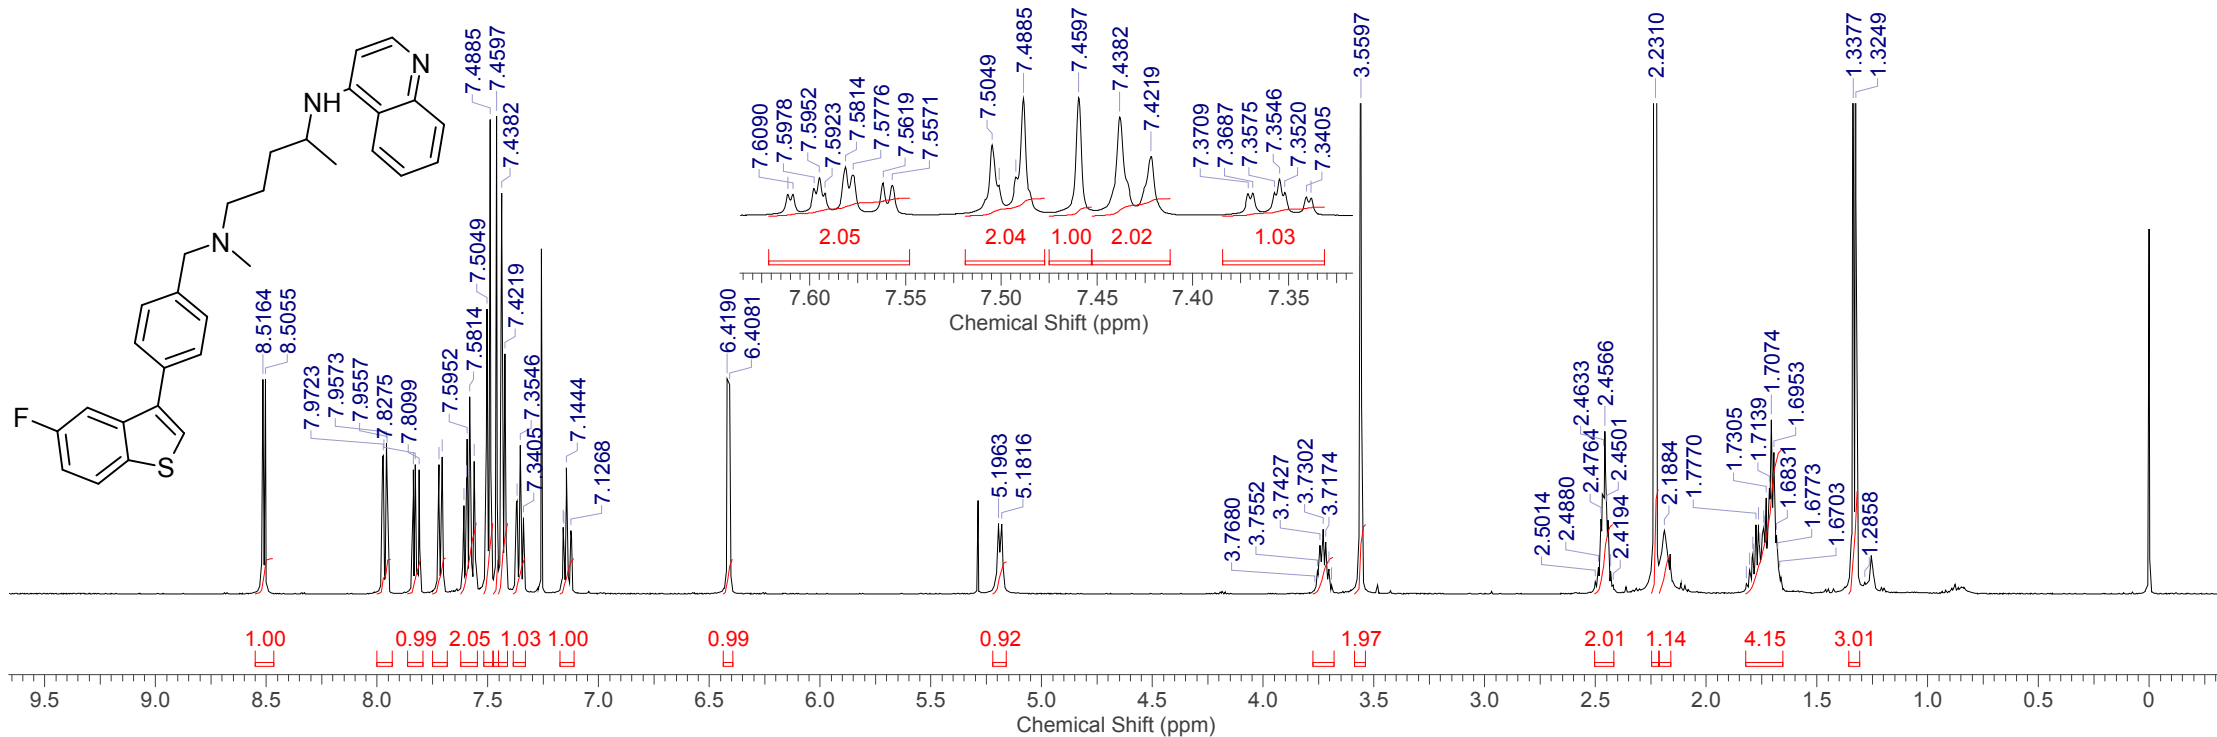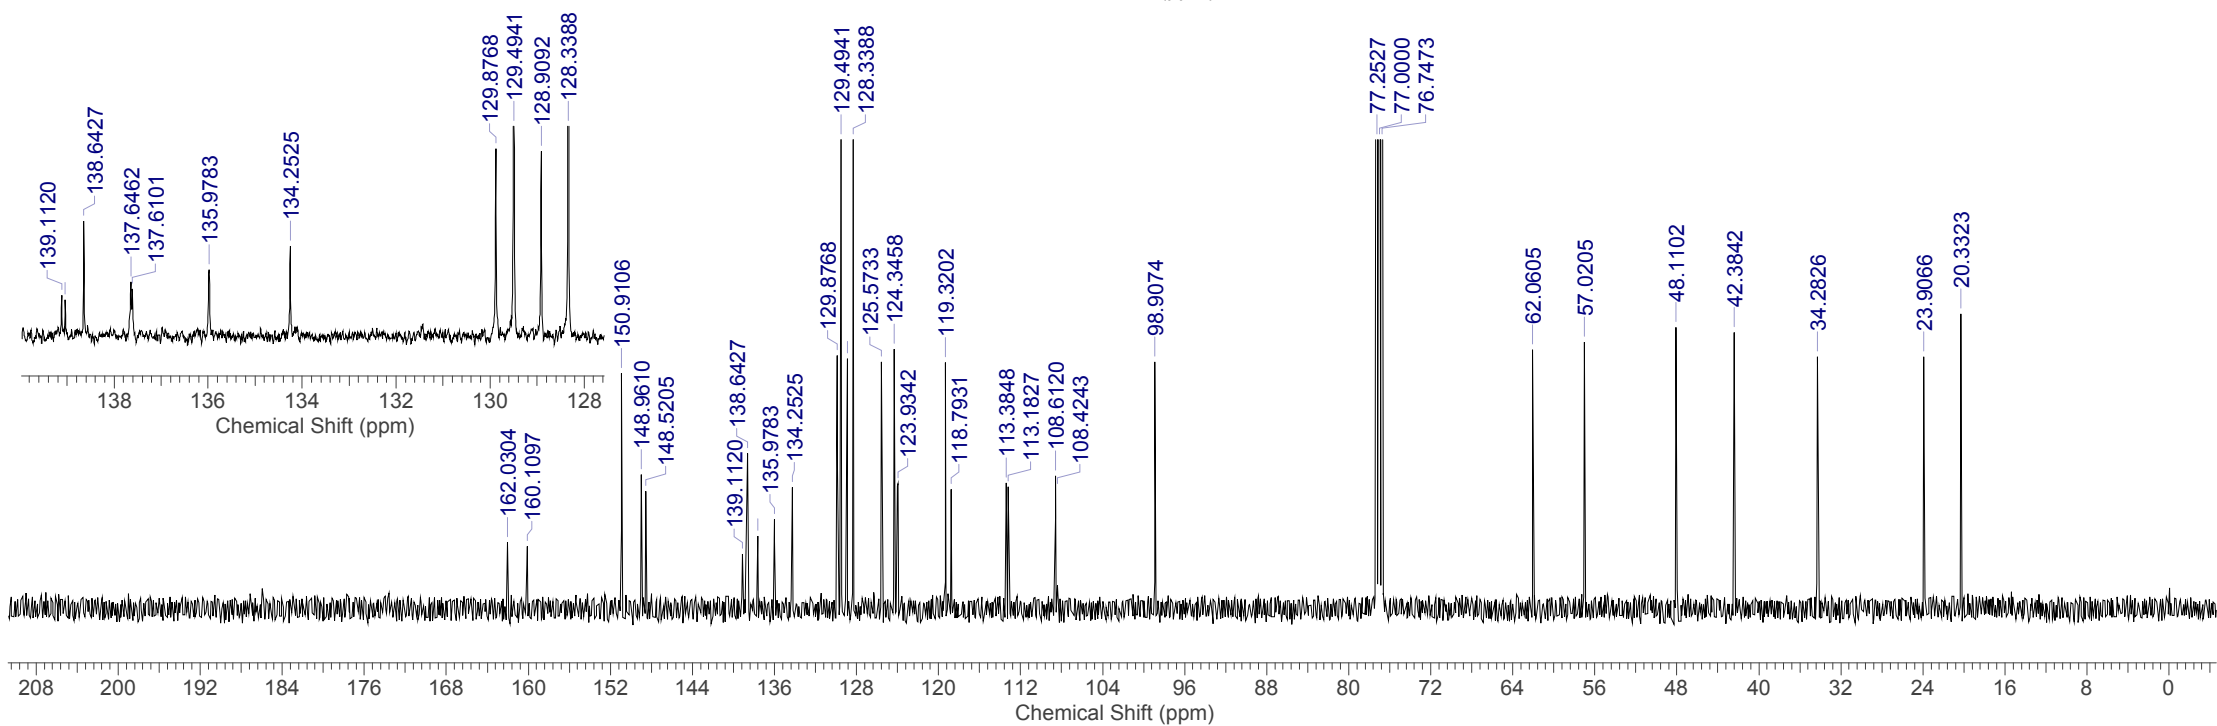

3-[4-({[4-(quinolin-4-ylamino)butyl]amino}methyl)phenyl]-1-benzothiophene-5-carbonitrile (28)

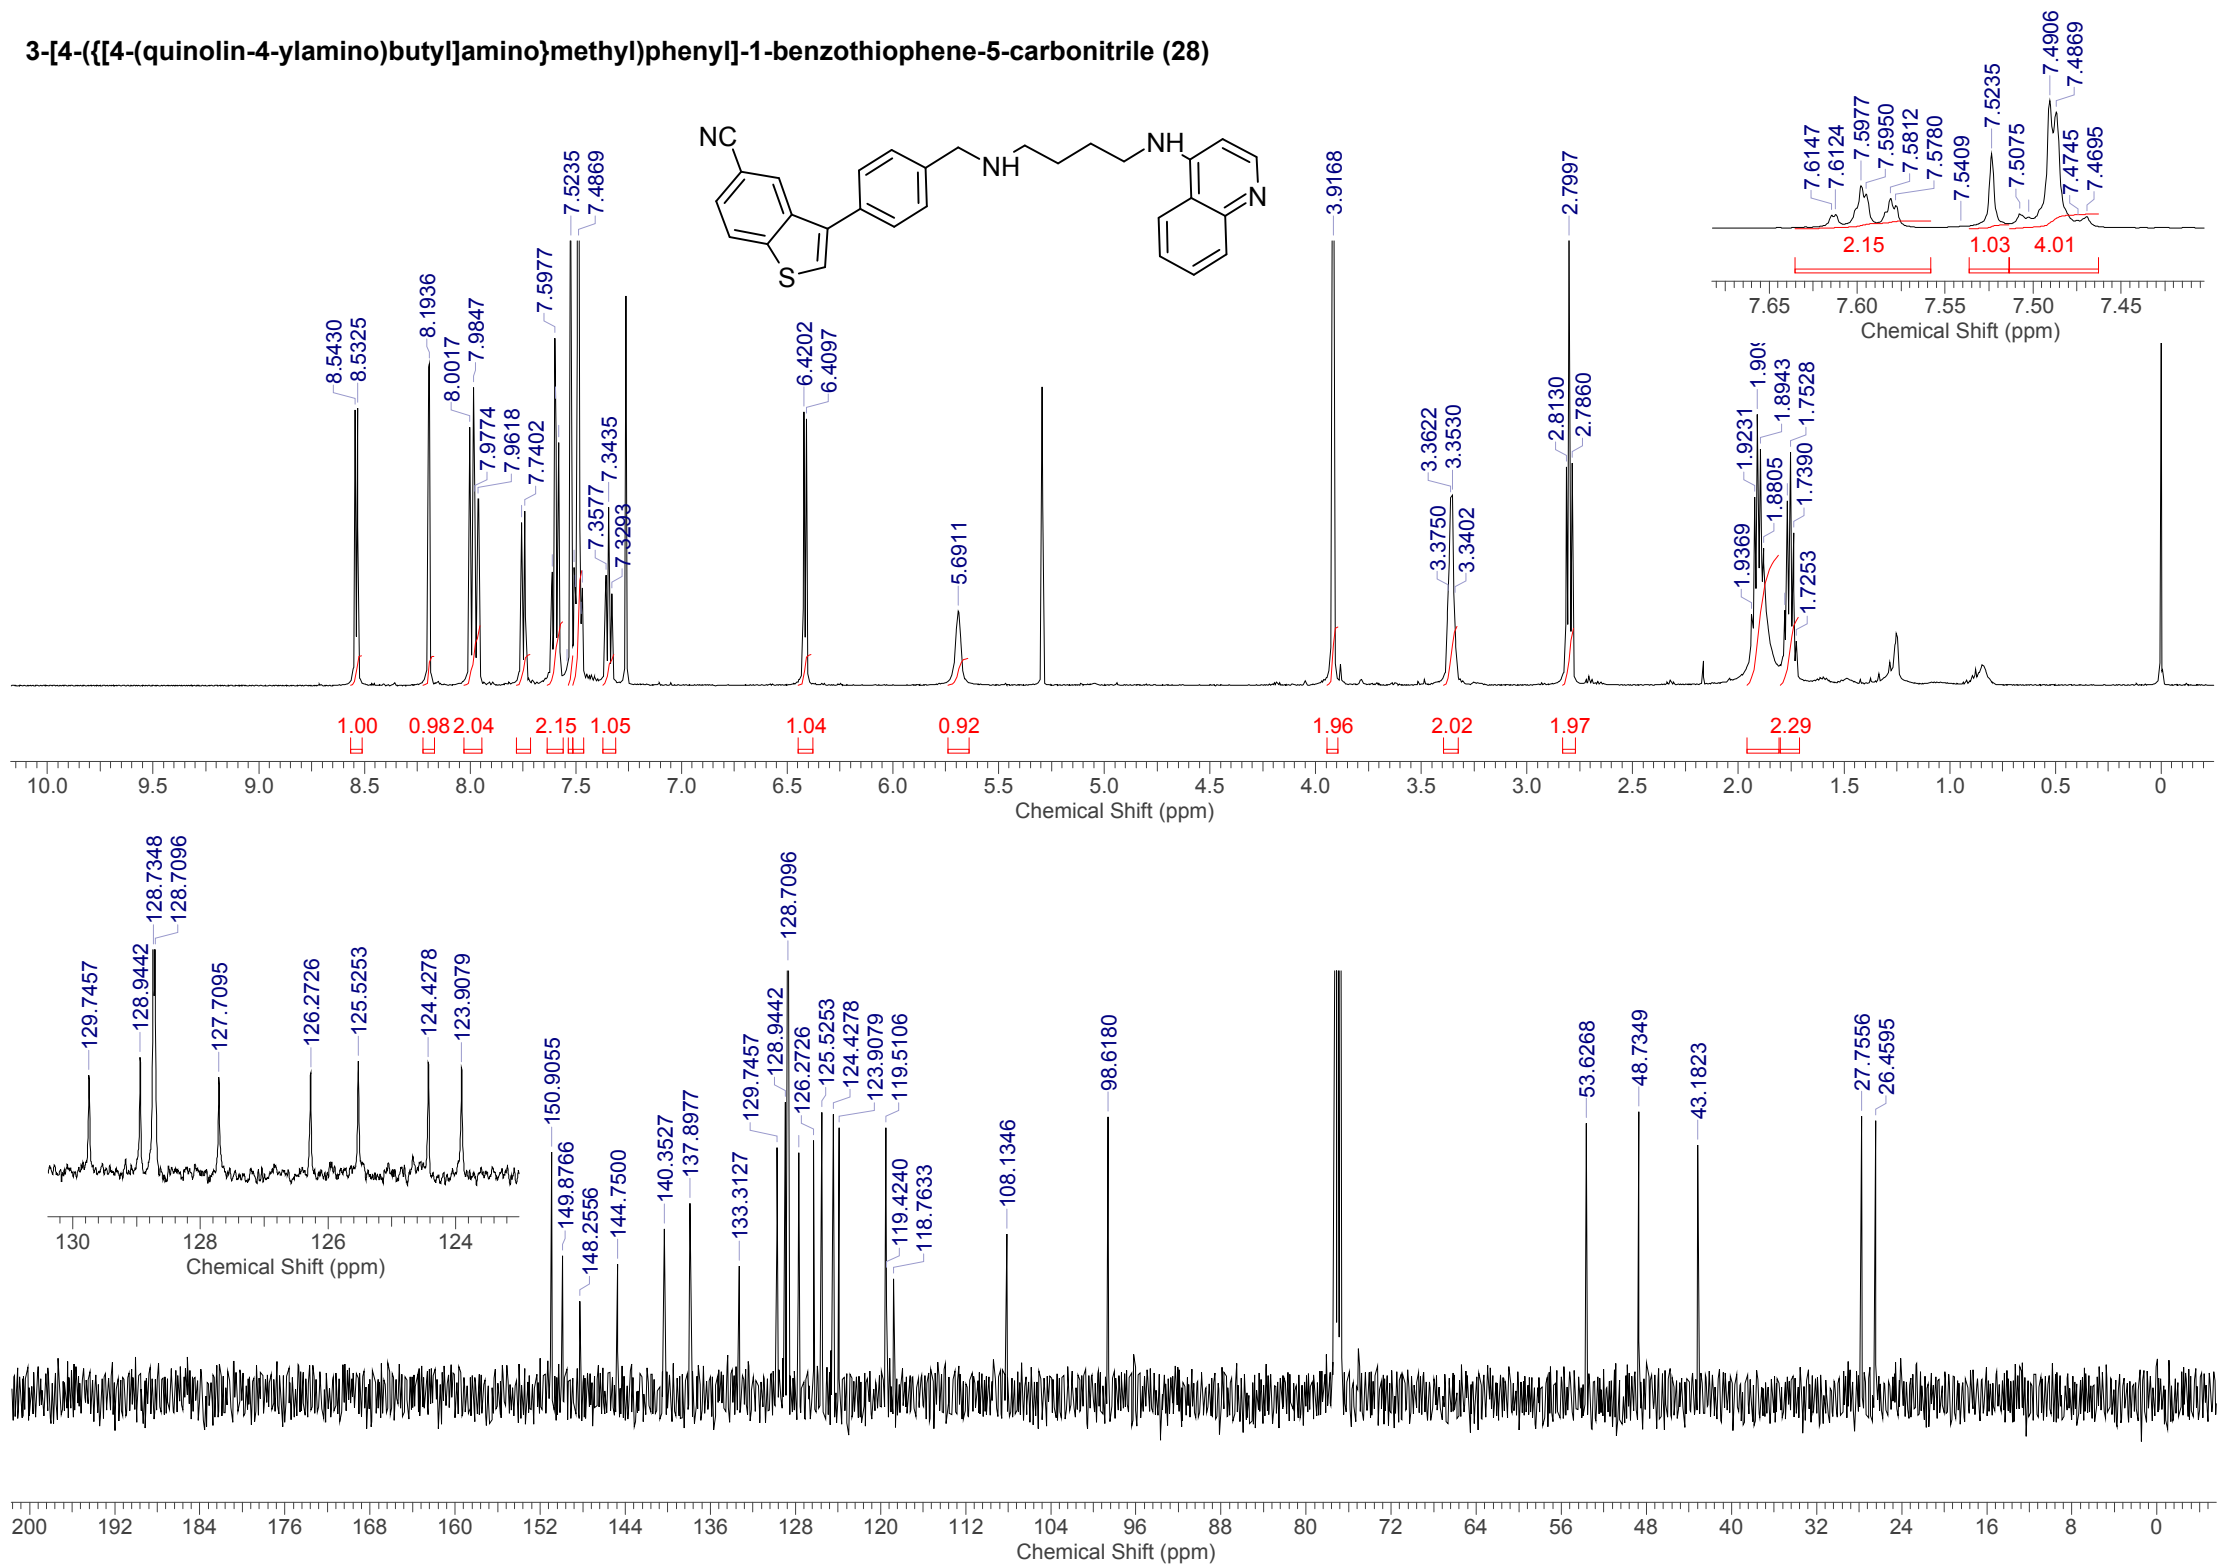

3-[4-({[4-(quinolin-4-ylamino)pentyl]amino}methyl)phenyl]-1-benzothiophene-5-carbonitrile (29)

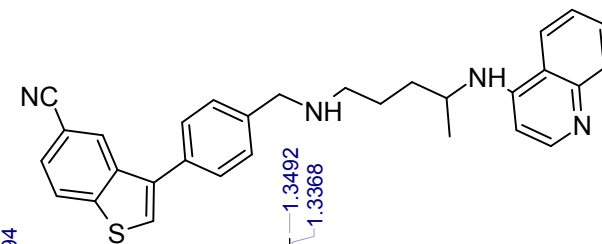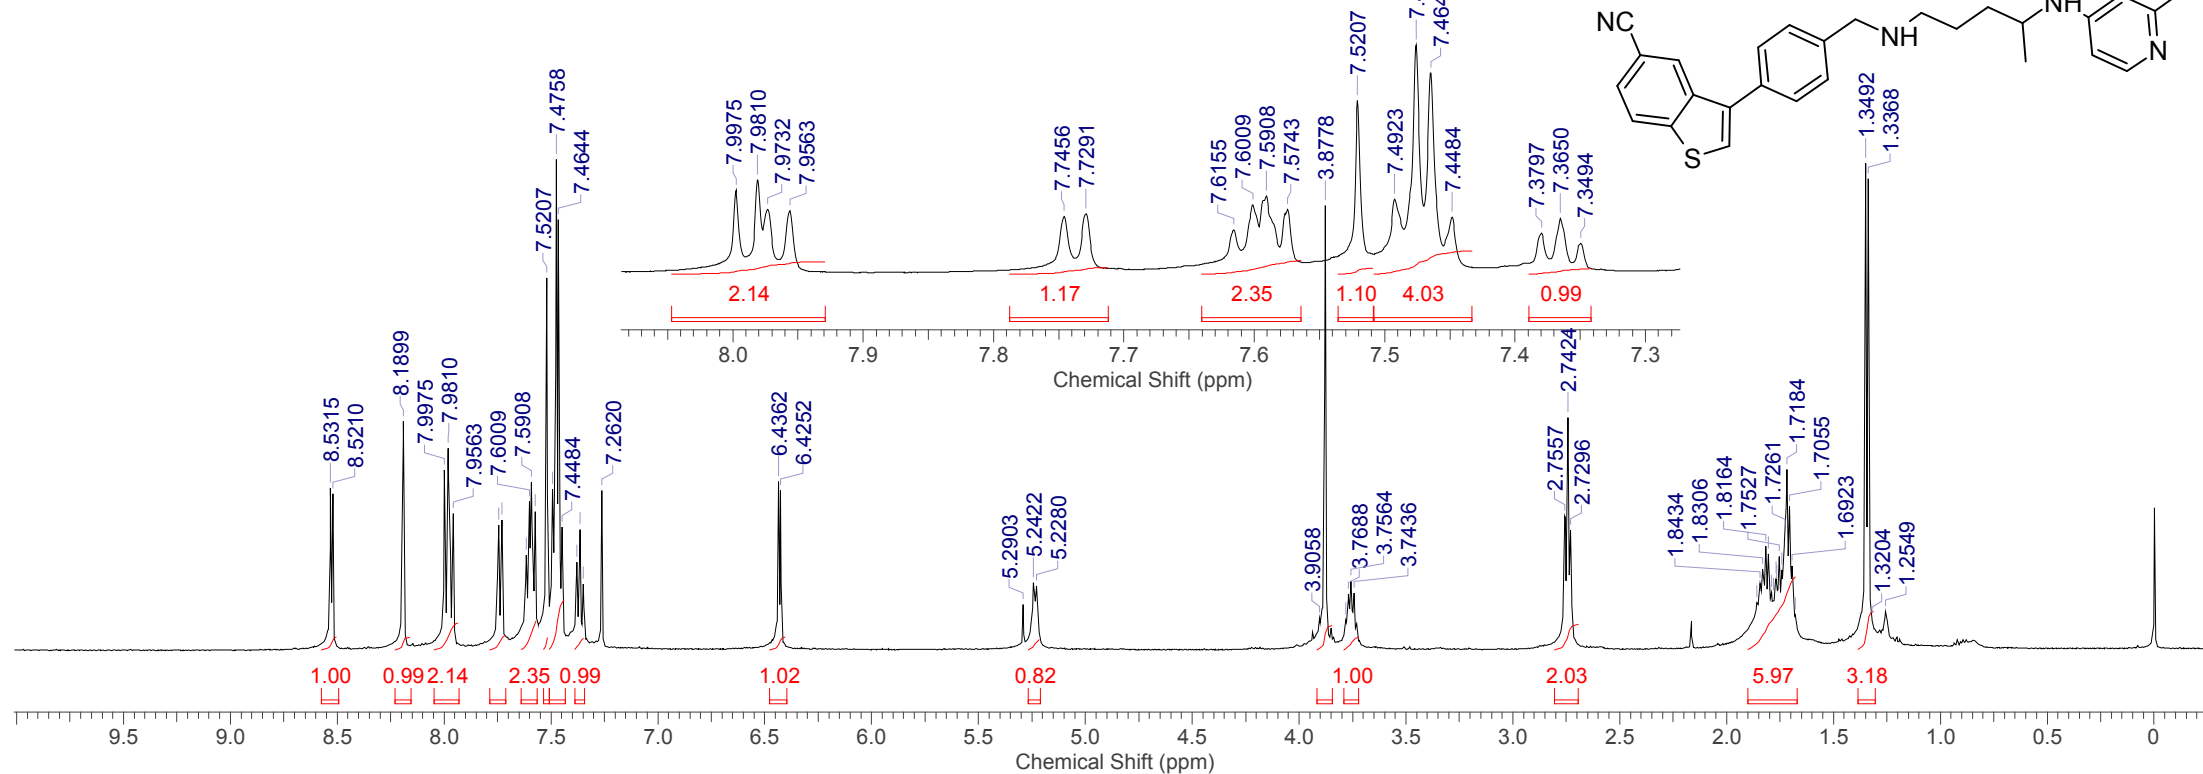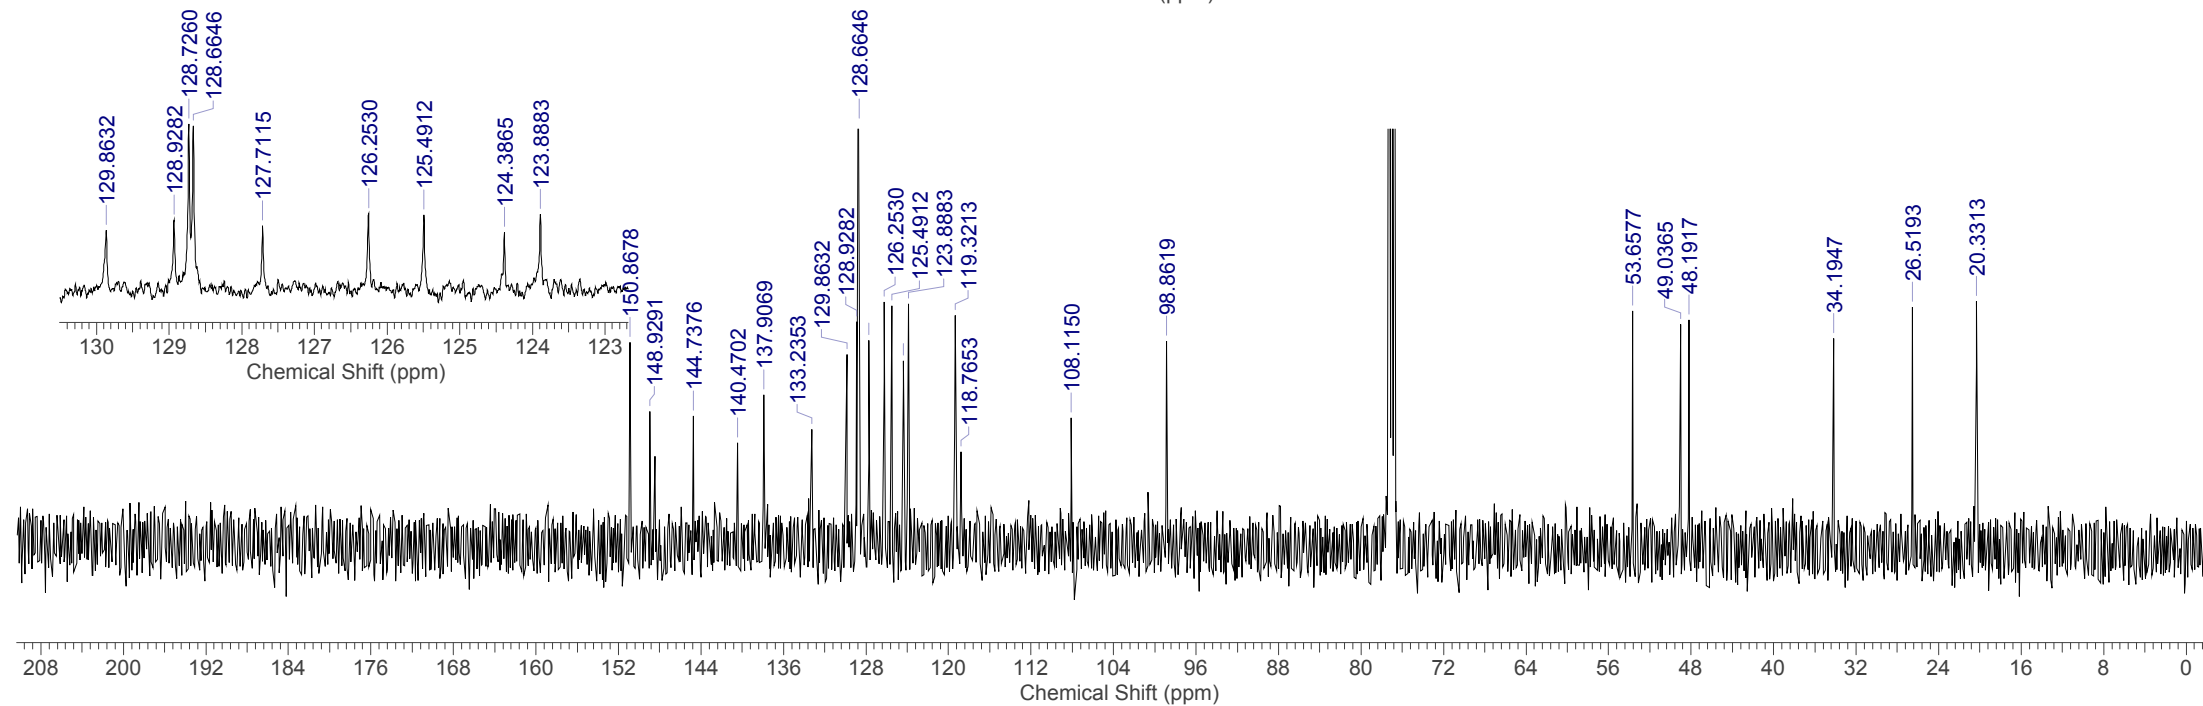

3-[4-({[6-(quinolin-4-ylamino)hexyl]amino}methyl)phenyl]-1-benzothiophene-5-carbonitrile (30)

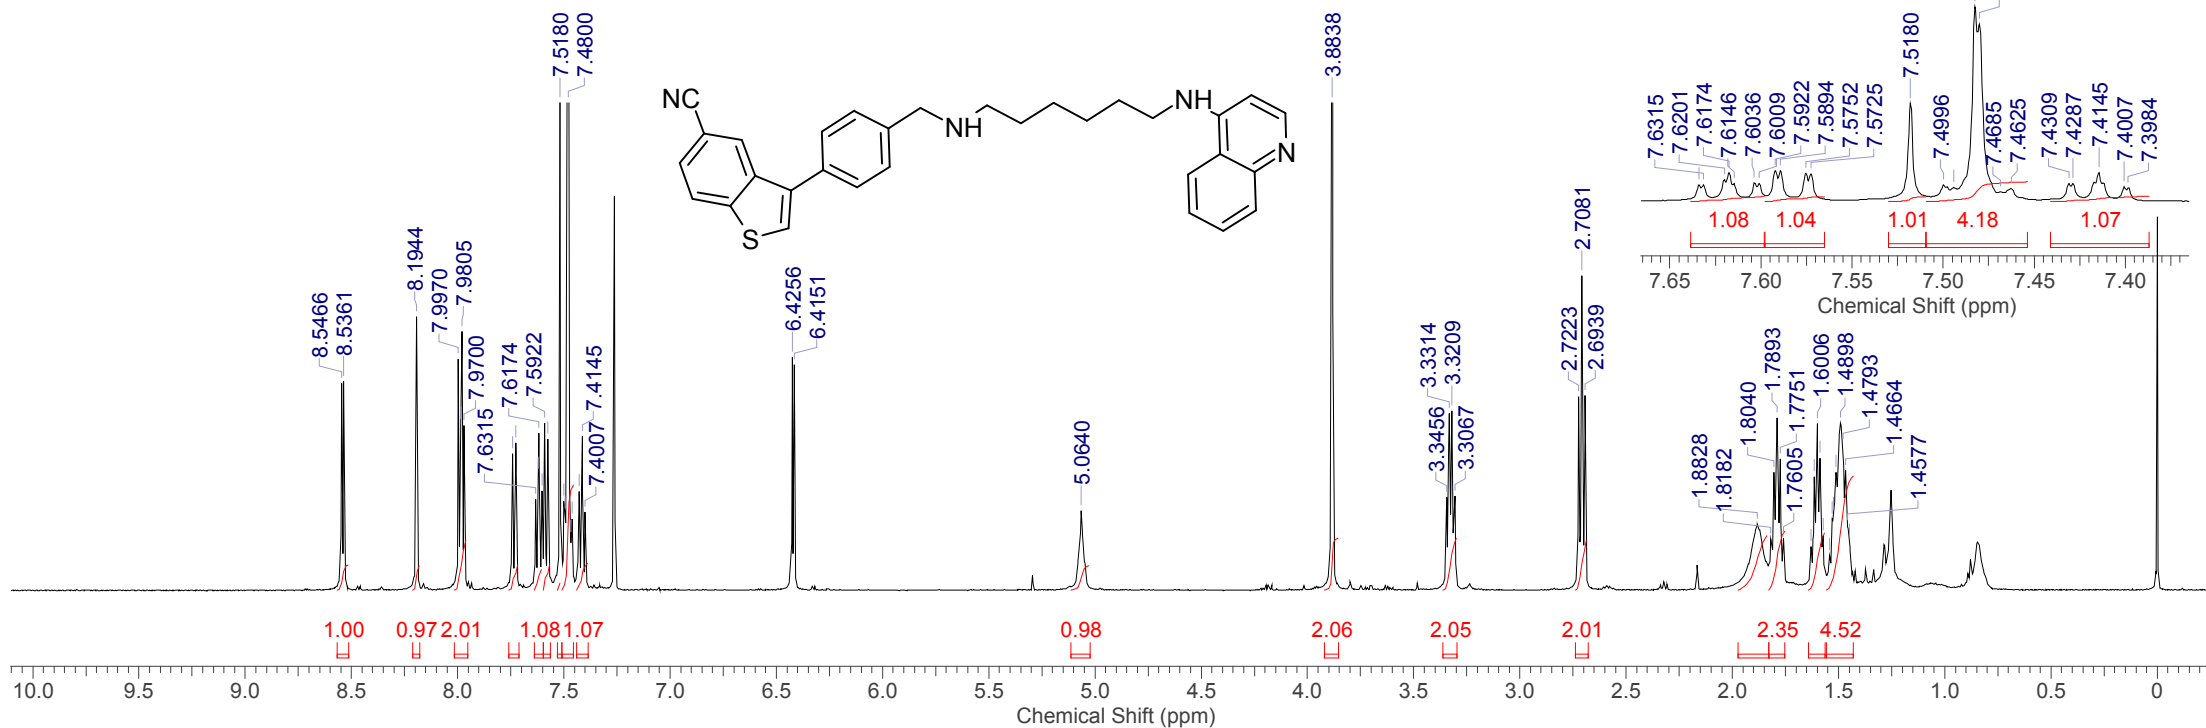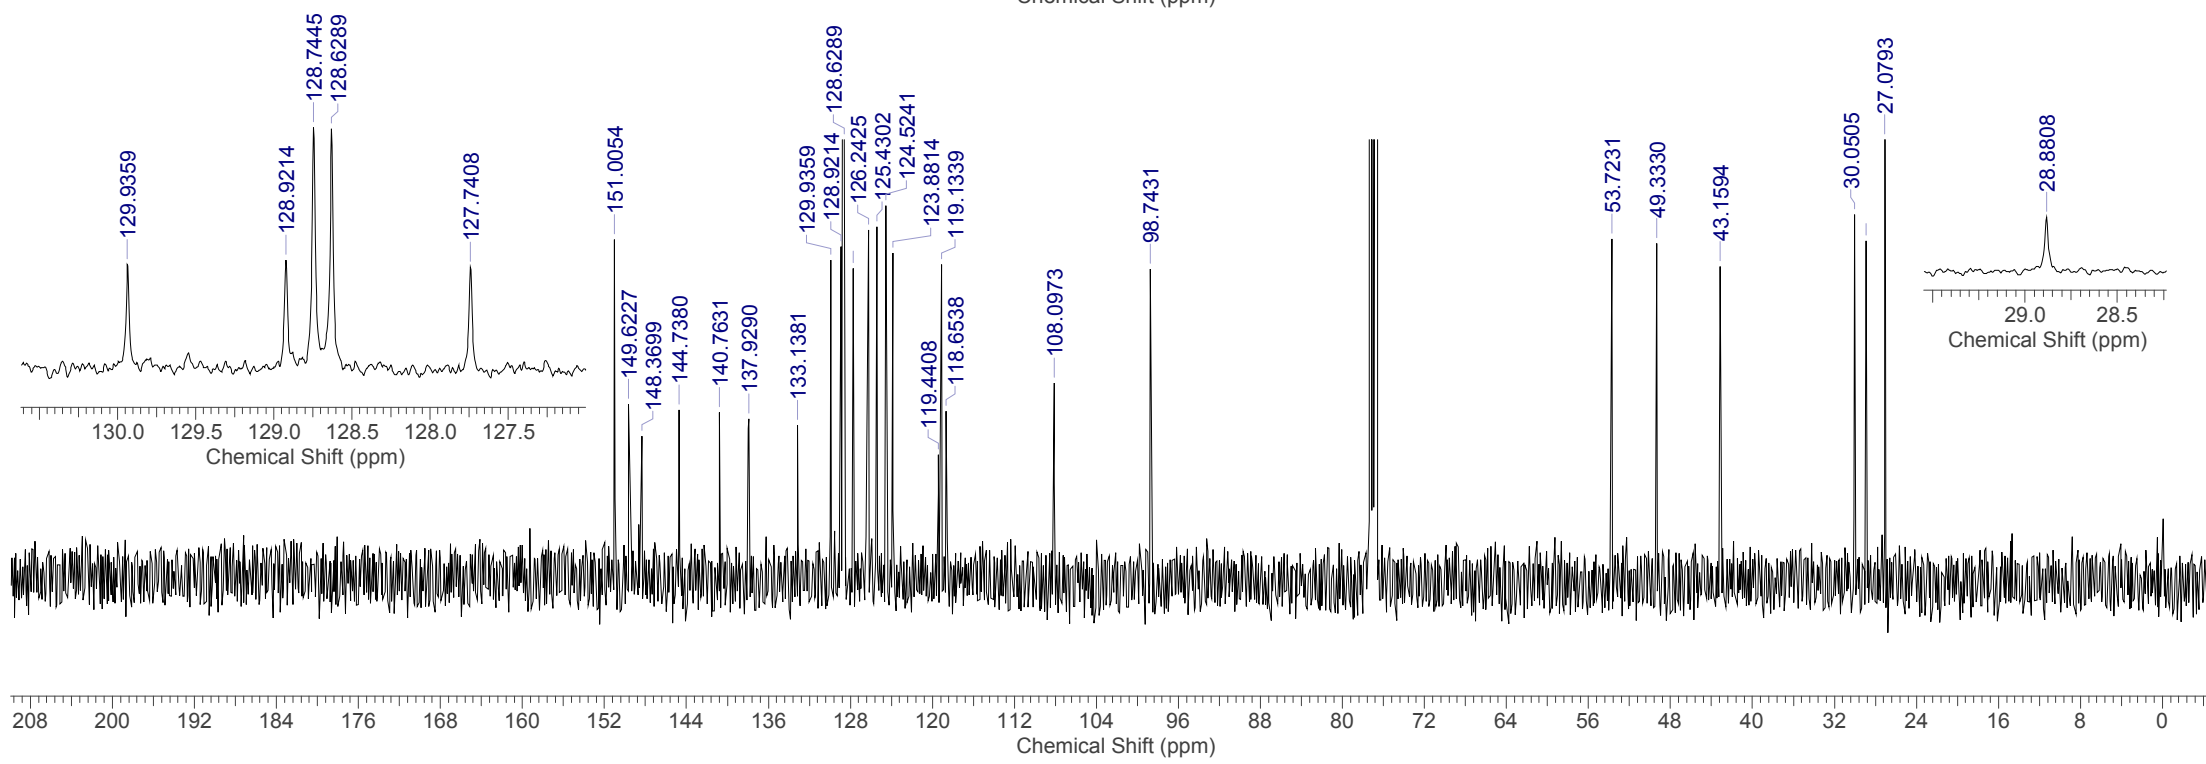

3-[4-([4-(quinolin-4-ylamino)butyl]amino)methyl]phenyl]-1-benzothiophene-6-carbonitrile (31)

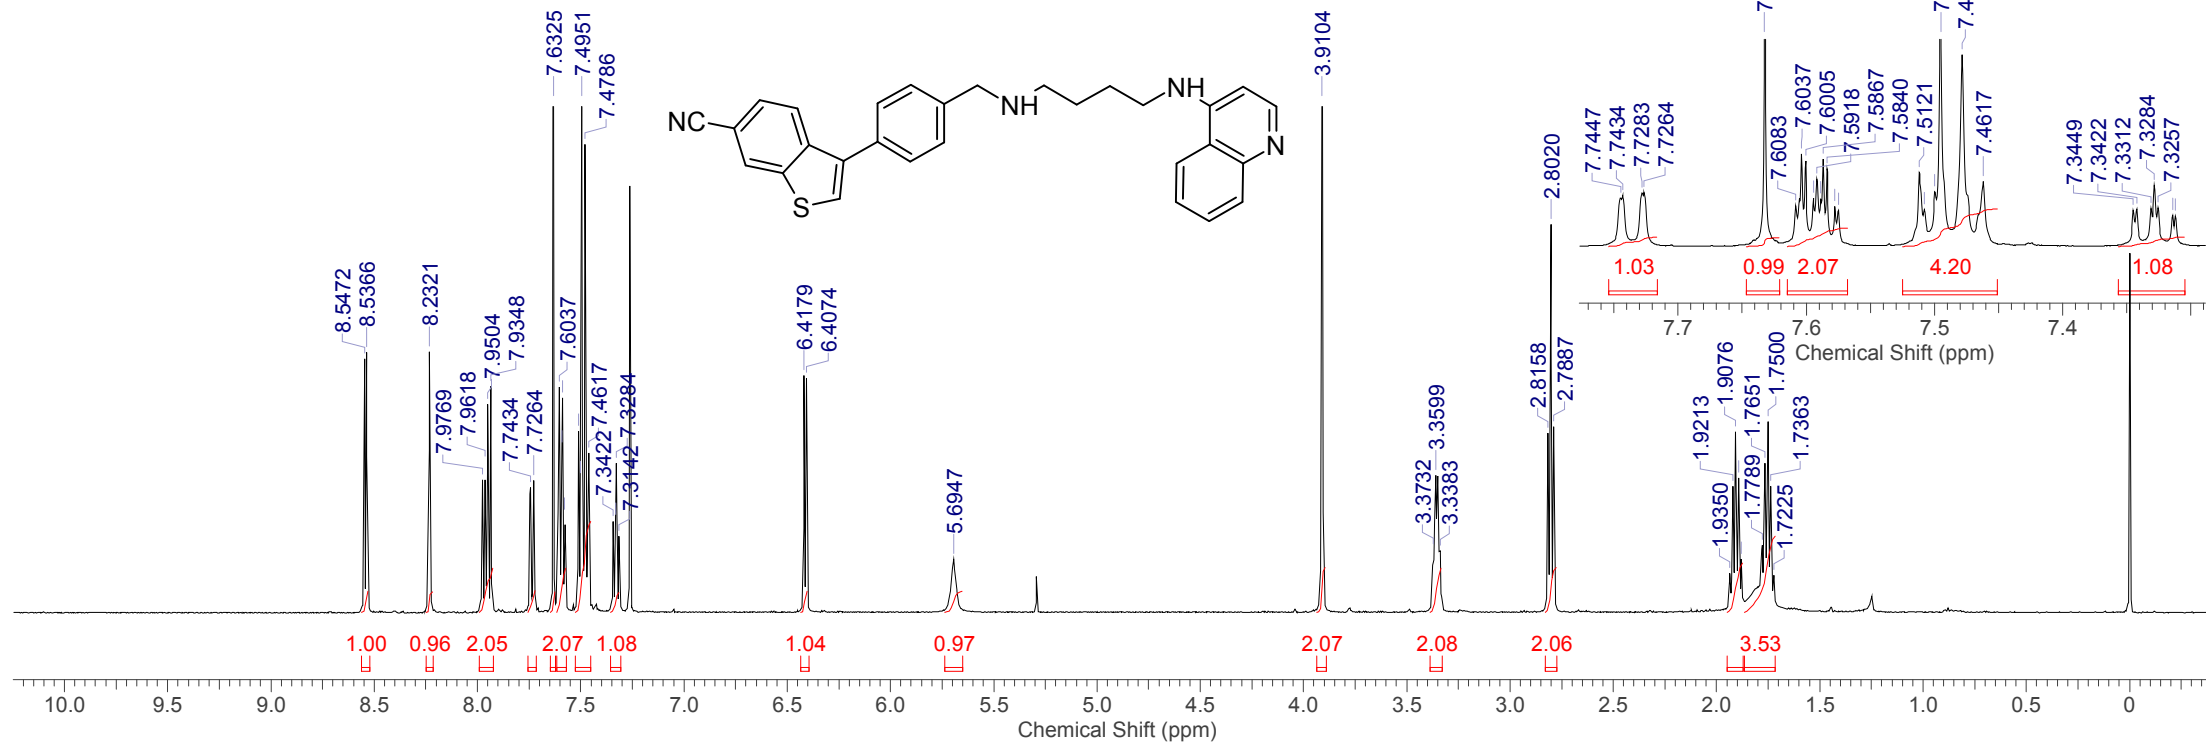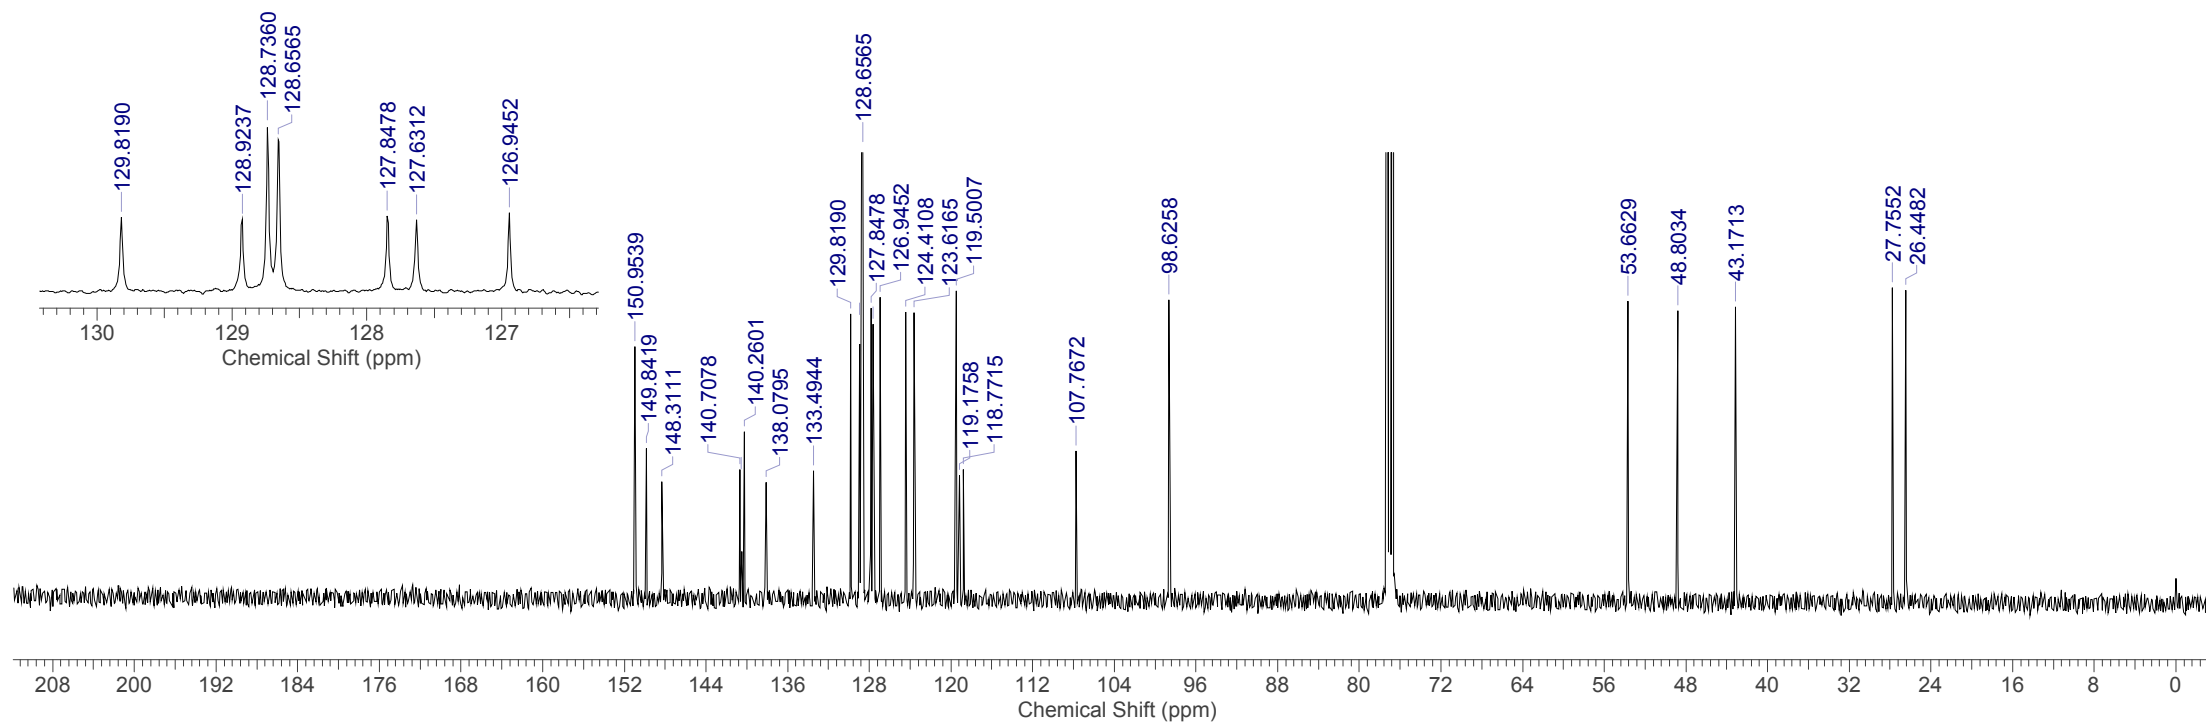



3-[4-({[6-(quinolin-4-ylamino)hexyl]amino}methyl)phenyl]-1-benzothiophene-6-carbonitrile (32)

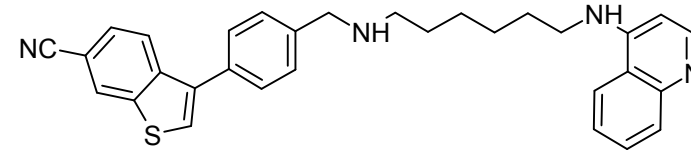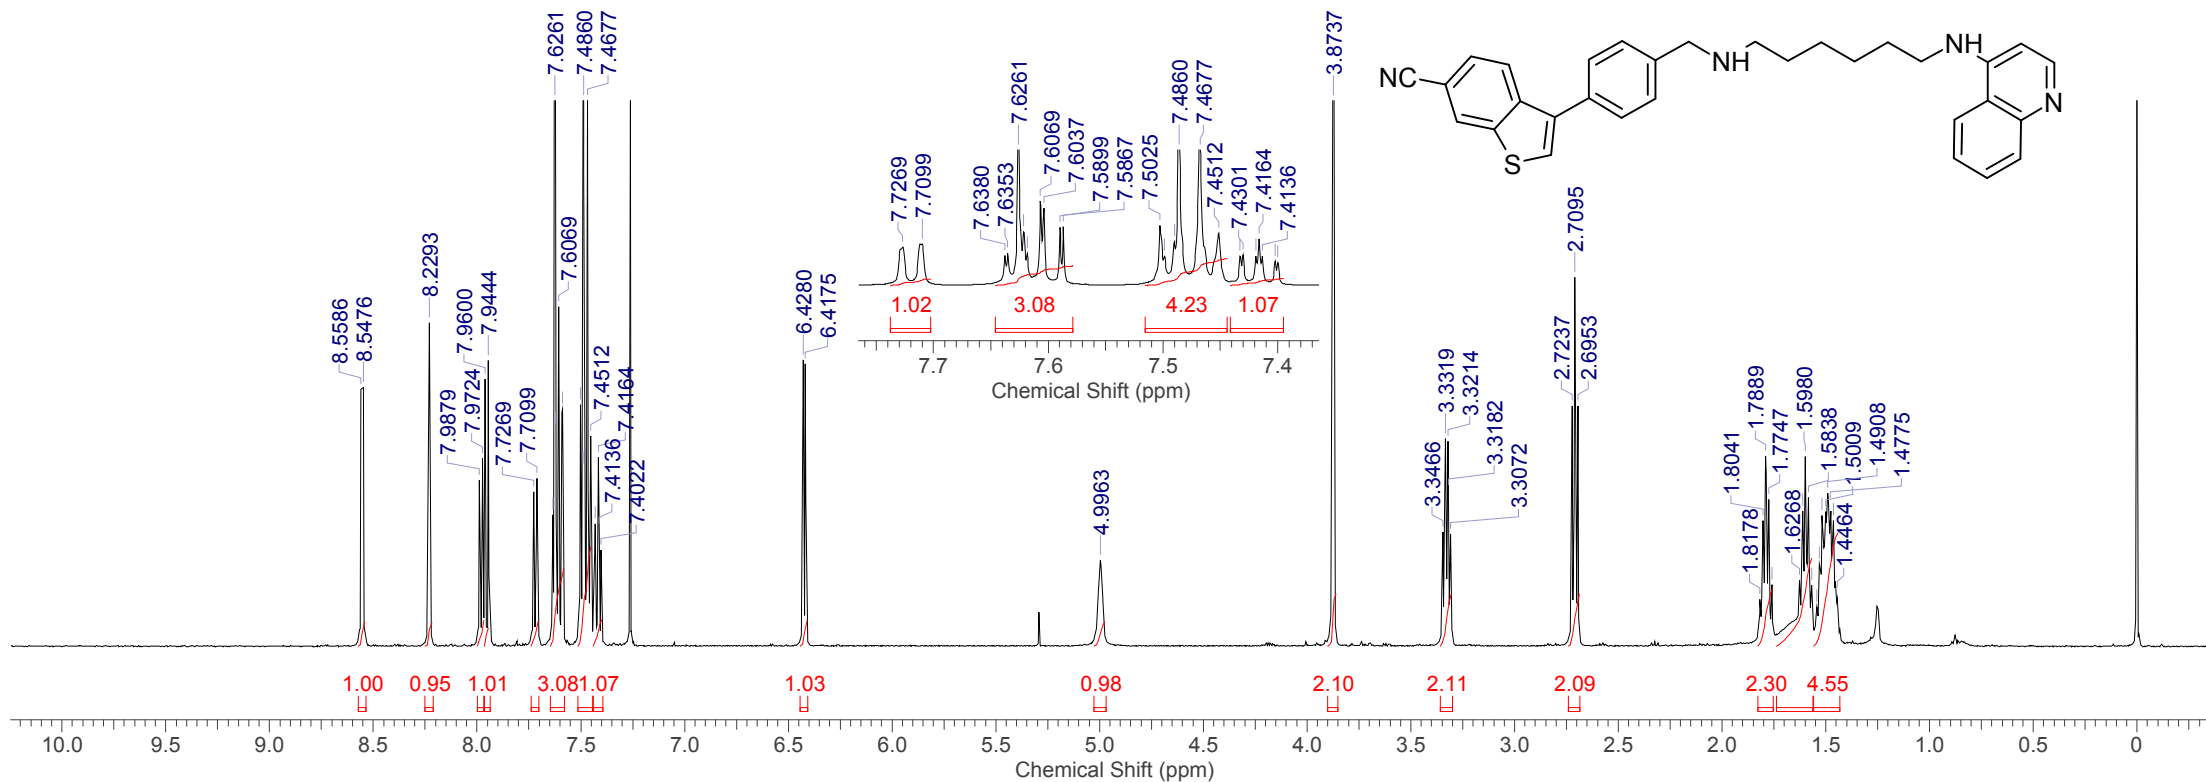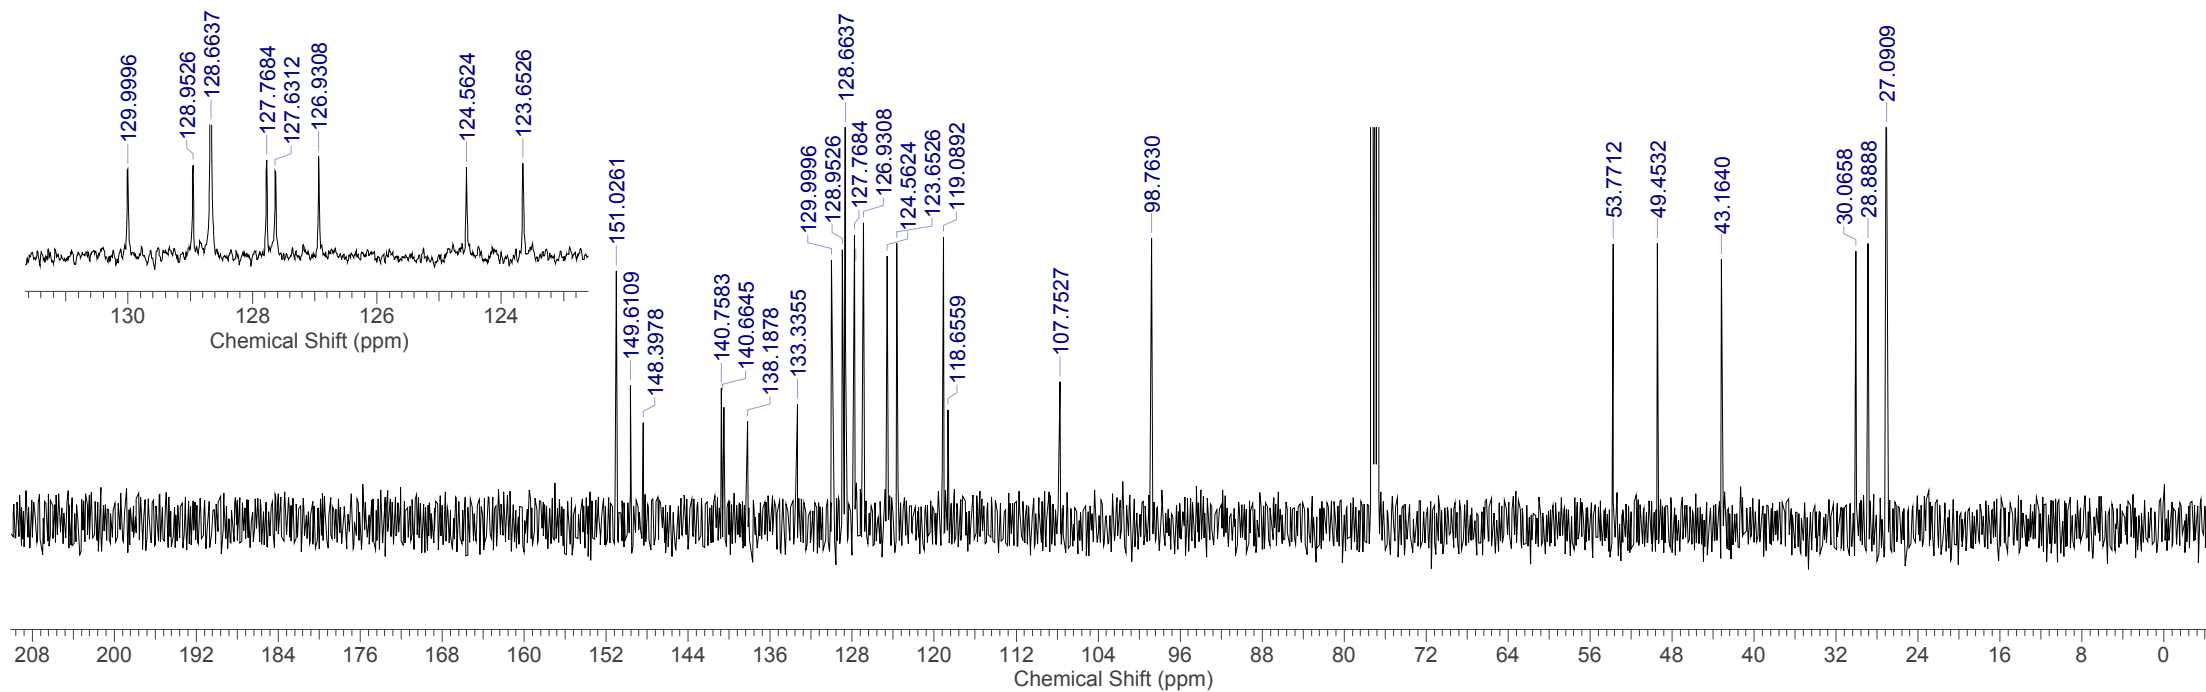



4-(5-{4-[(2-{(7-chloroquinolin-4-yl)amino}ethyl)amino)methyl]phenyl}-2-thienyl)benzonitrile (37)

11/14/6 SA AQ2

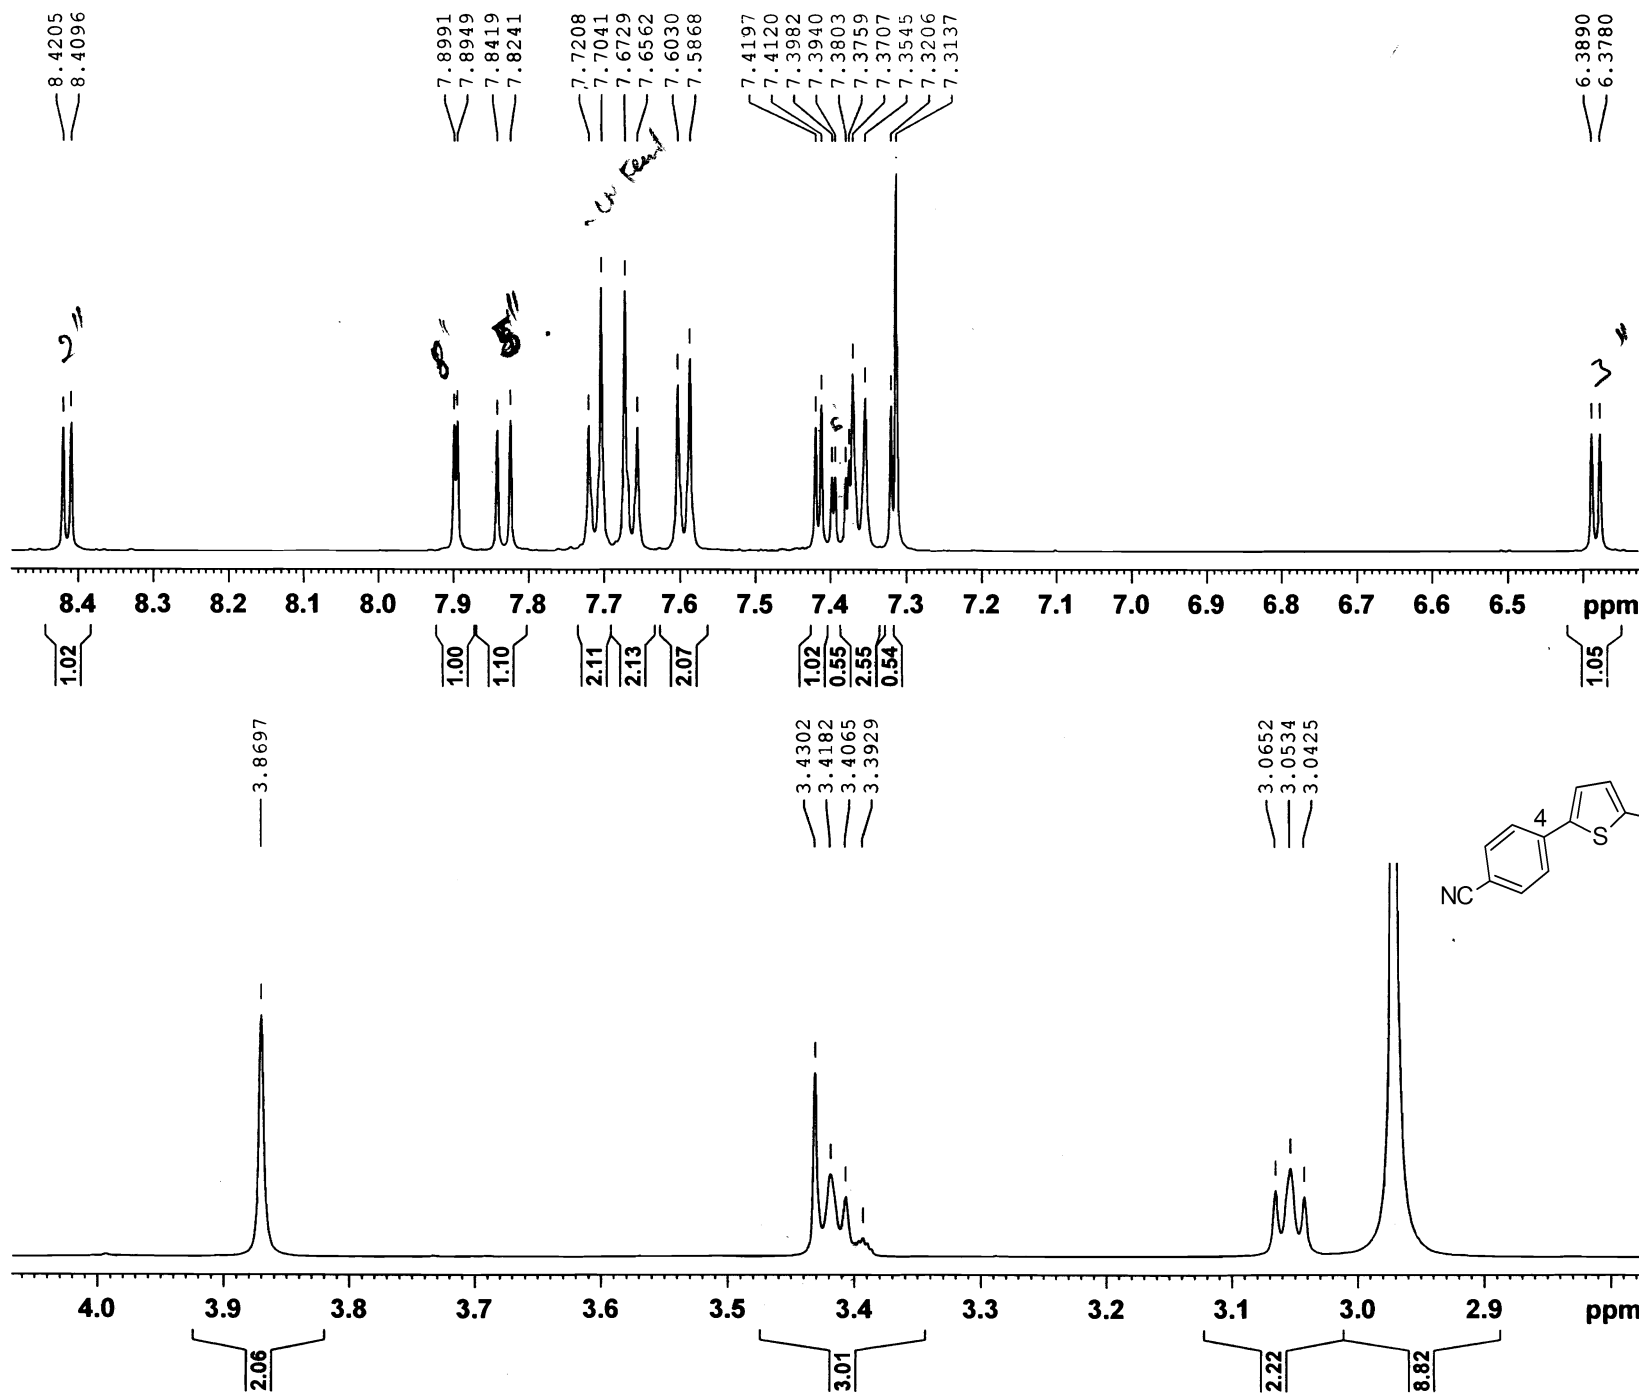

NAME MVAA181  
 EXPNO 1  
 PROCNO 1  
 Date\_ 20111216  
 Time 9.43  
 INSTRUM spect  
 PROBHD 5 mm BBO BB-1H  
 PULPROG zg30  
 TD 32768  
 SOLVENT CDCl3  
 NS 30  
 DS 0  
 SWH 5813.954 Hz  
 FIDRES 0.177428 Hz  
 AQ 2.8180981 sec  
 RG 575  
 DW 86.000 usec  
 DE 6.50 usec  
 TE 298.0 K  
 D1 2.00000000 sec  
 TDO 1

===== CHANNEL f1 =====  
 NUC1 1H  
 P1 9.35 usec  
 PL1 0.00 dB  
 PL1W 27.37956238 W  
 SFO1 500.2625923 MHz  
 SI 16384  
 SF 500.2599881 MHz  
 WDW EM  
 SSB 0  
 LB 0.30 Hz  
 GB 0  
 PC 1.00

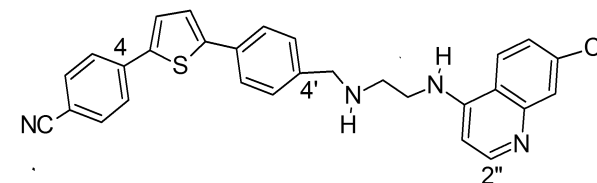

4-{5-[4-[(2-[(7-chloroquinolin-4-yl)amino]ethyl)amino)methyl]phenyl]-2-thienyl}benzonitrile (37)

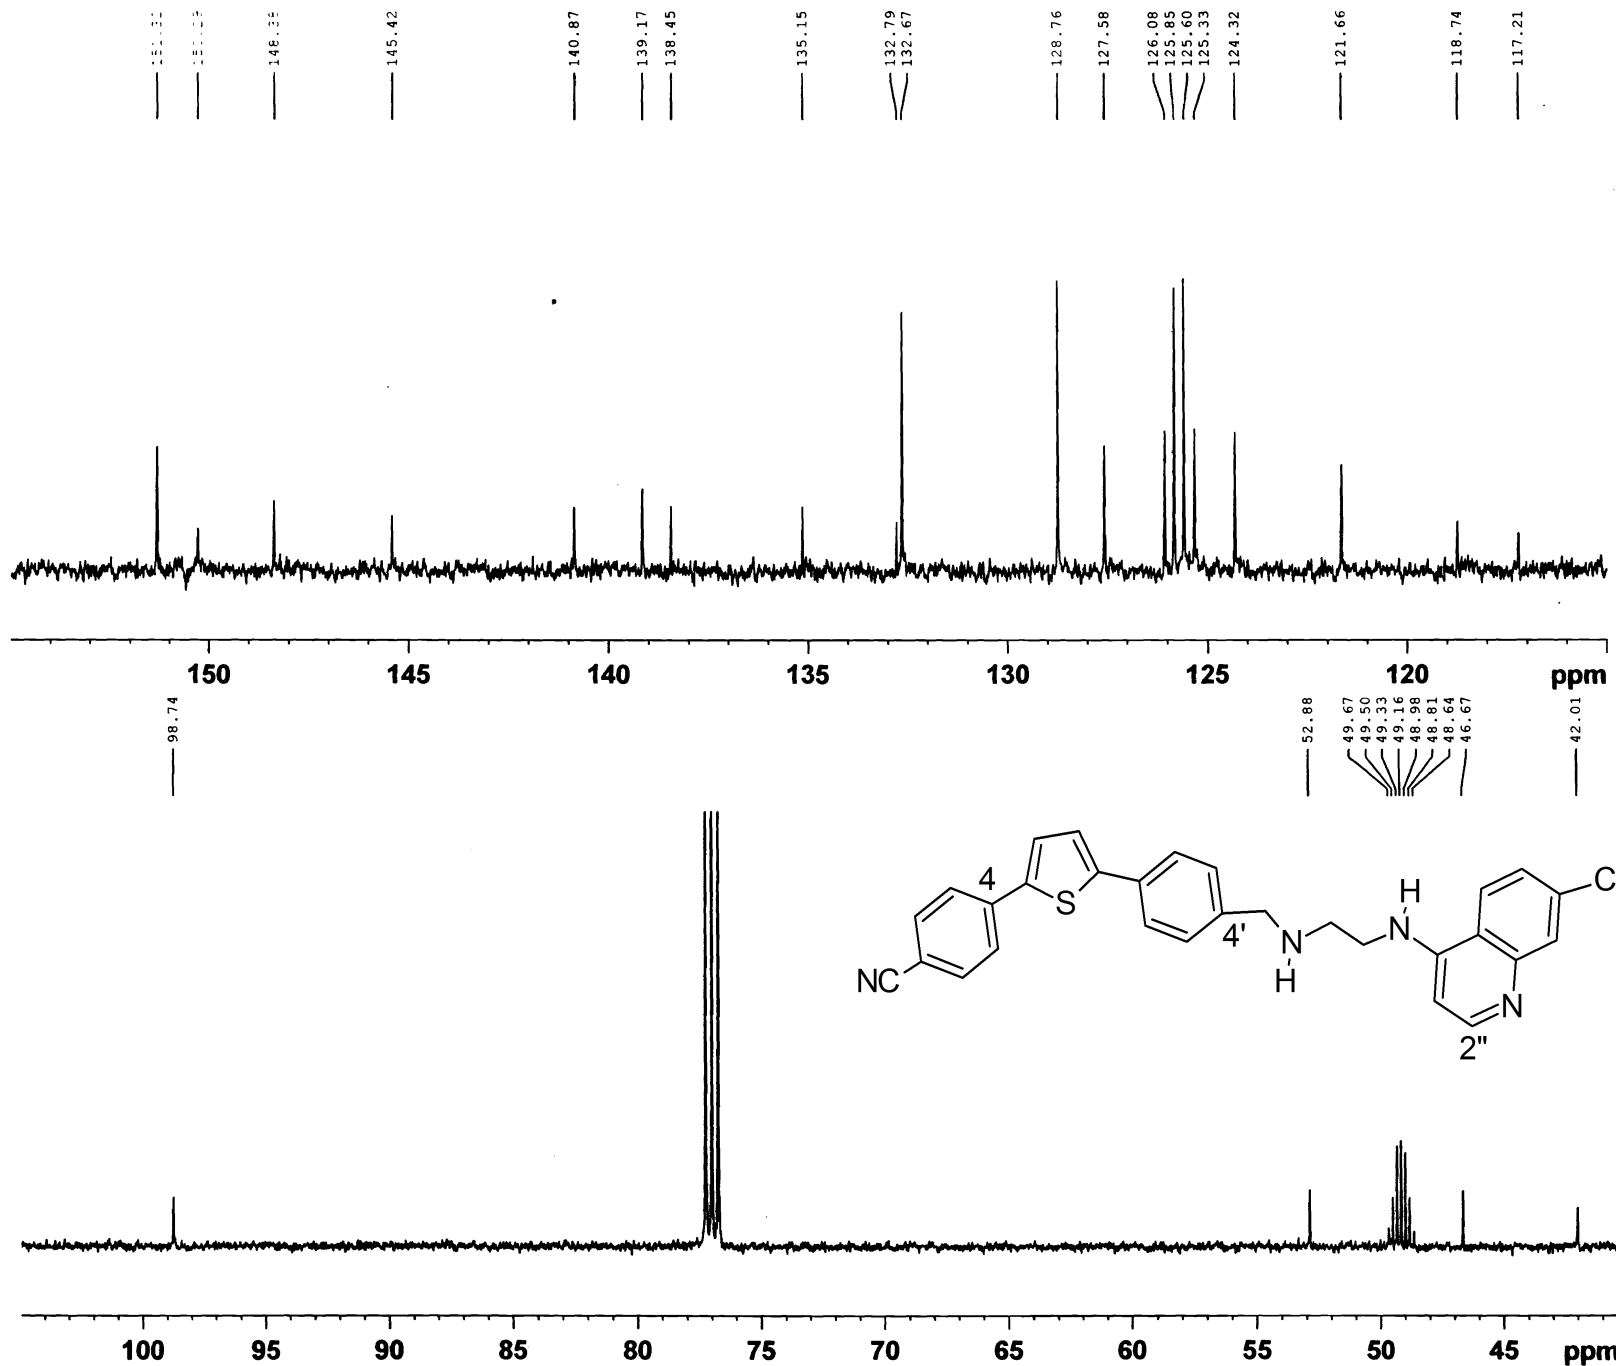

NAME MVAAL181  
 EXPNO 2  
 PROCNO 1  
 Date\_ 20111216  
 Time\_ 9.48  
 INSTRUM spect  
 PROBHD 5 mm BBO BB-1H  
 PULPROG zgpg30  
 TD 32768  
 SOLVENT CDC13  
 NS 625  
 DS 4  
 SWH 29761.904 Hz  
 FIDRES 0.908261 Hz  
 AQ 0.5505524 sec  
 RG 1290  
 DW 16.800 usec  
 DE 6.50 usec  
 TE 298.1 K  
 D1 2.00000000 sec  
 D11 0.03000000 sec  
 TD0 1

===== CHANNEL f1 =====  
 NUC1 13C  
 P1 11.50 usec  
 PL1 3.00 dB  
 PL1W 32.22848892 W  
 SFO1 125.8043140 MHz

===== CHANNEL f2 =====  
 CPDPRG2 waltz16  
 NUC2 1H  
 PCPD2 80.00 usec  
 PL2 1.20 dB  
 PL12 18.40 dB  
 PL13 18.40 dB  
 PL2W 20.76952171 W  
 PL12W 0.39575511 W  
 PL13W 0.39575511 W  
 SFO2 500.2620010 MHz  
 SI 32768  
 SF 125.7904878 MHz  
 WDW EM  
 SSB 0  
 LB 1.50 Hz  
 GB 0  
 PC 1.40

4-(5-{4-[[{3-[(7-chloroquinolin-4-yl)amino]propyl}amino)methyl]phenyl}-2-thienyl)benzonitrile (38)

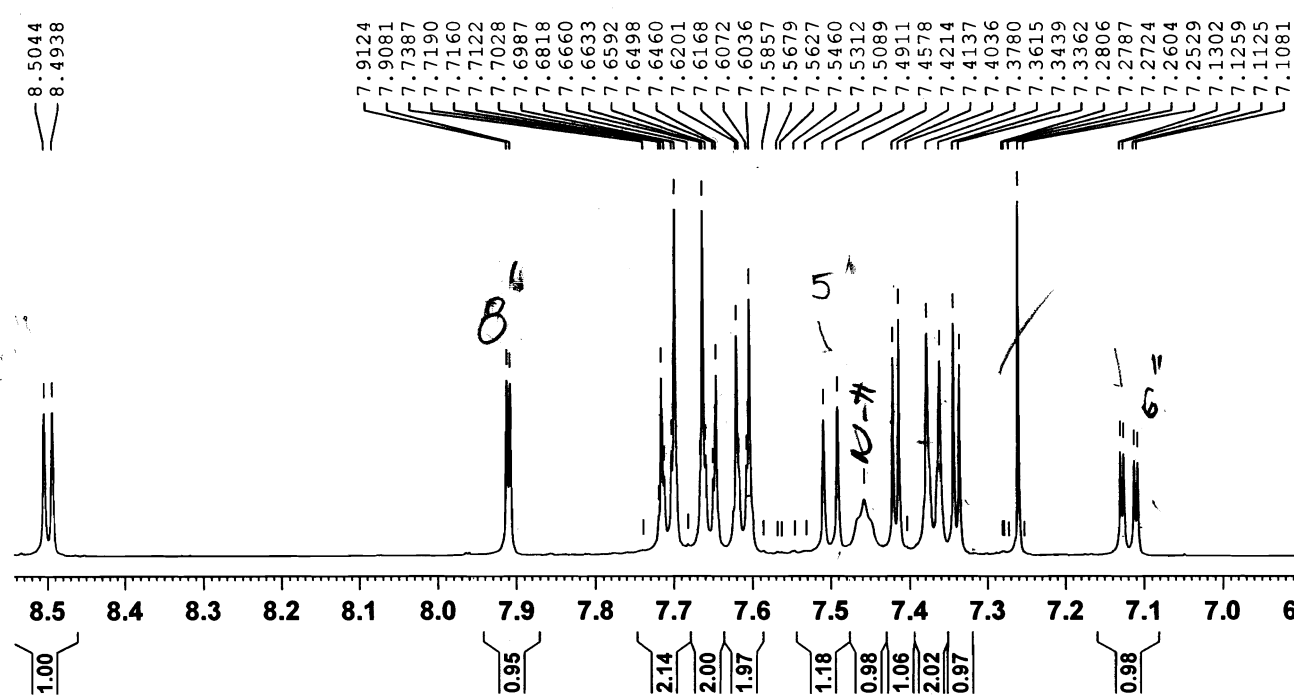

NAME MVAA210a  
 EXPNO 1  
 PROCNO 1  
 Date\_ 20120315  
 Time\_ 8.16  
 INSTRUM spect  
 PROBHD 5 mm BBO BB-1H  
 PULPROG zg30  
 TD 32768  
 SOLVENT CDCl3  
 NS 16  
 DS 0  
 SWH 6487.889 Hz  
 FIDRES 0.197995 Hz  
 AQ 2.5253706 sec  
 RG 322  
 DW 77.067 use  
 DE 6.50 use  
 TE 298.0 K  
 D1 2.00000000 sec  
 TD0 1

===== CHANNEL f1 =====  
 NUC1 1H  
 P1 9.35 use  
 PL1 0.00 dB  
 PL1W 27.37956238 W  
 SFO1 500.2627938 MHz  
 SI 32768  
 SF 500.2600143 MHz  
 WDW EM  
 SSB 0  
 LB 0.20 Hz  
 GB 0  
 PC 1.00

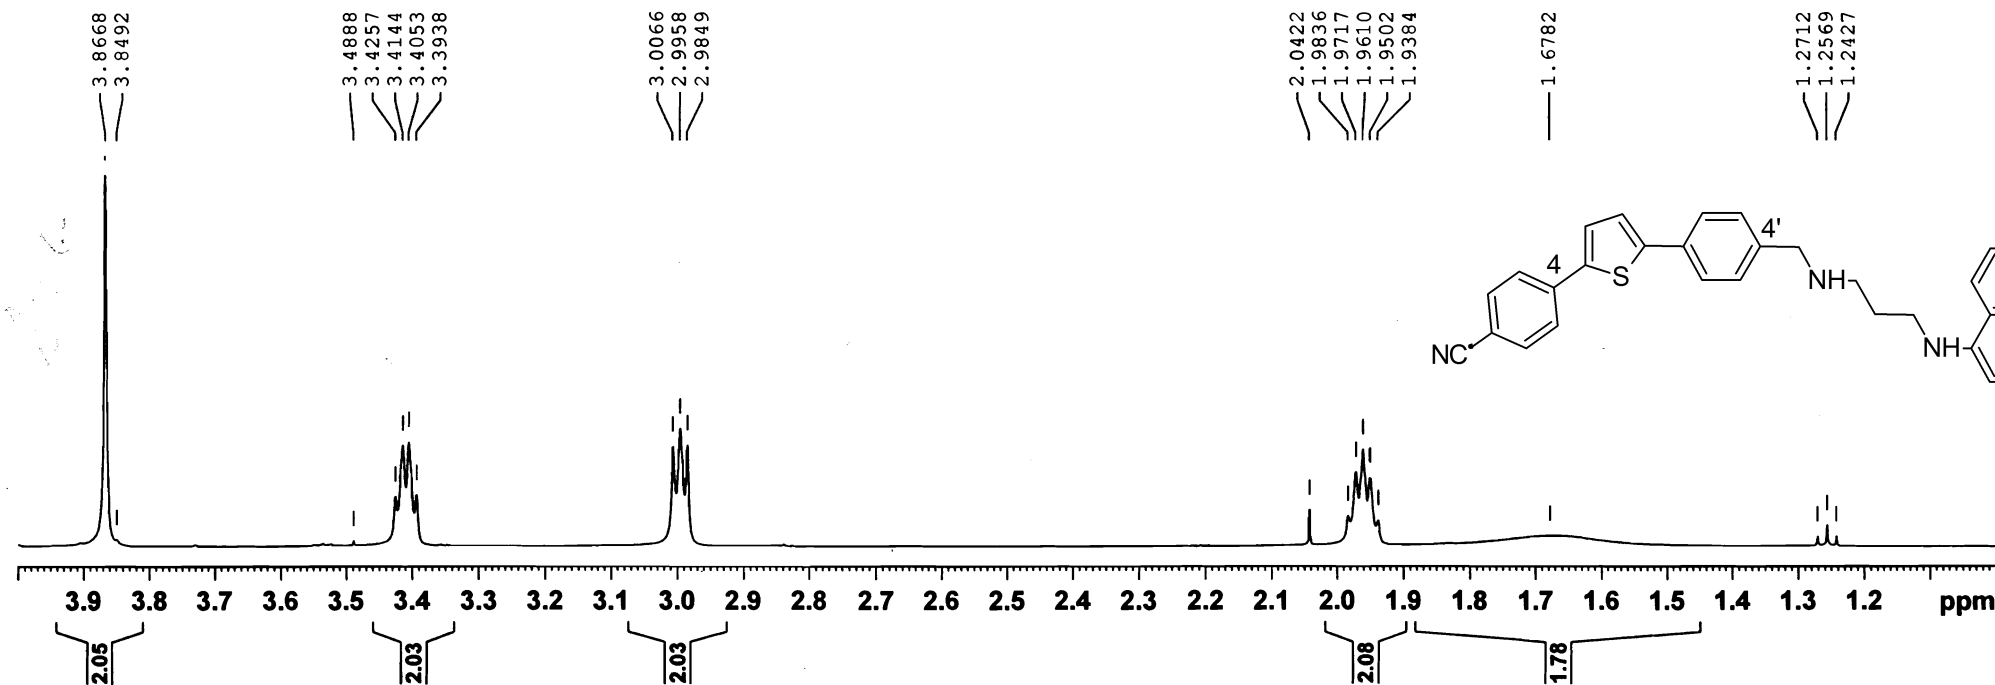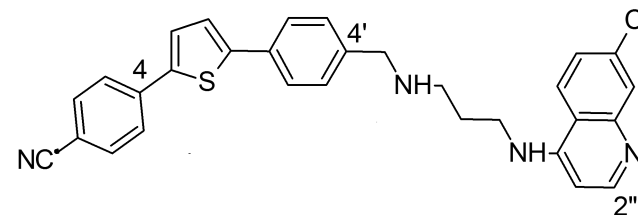

4-(5-{4-[(3-[(7-chloroquinolin-4-yl)amino]propyl)amino)methyl]phenyl}-2-thienyl)benzonitrile (38)

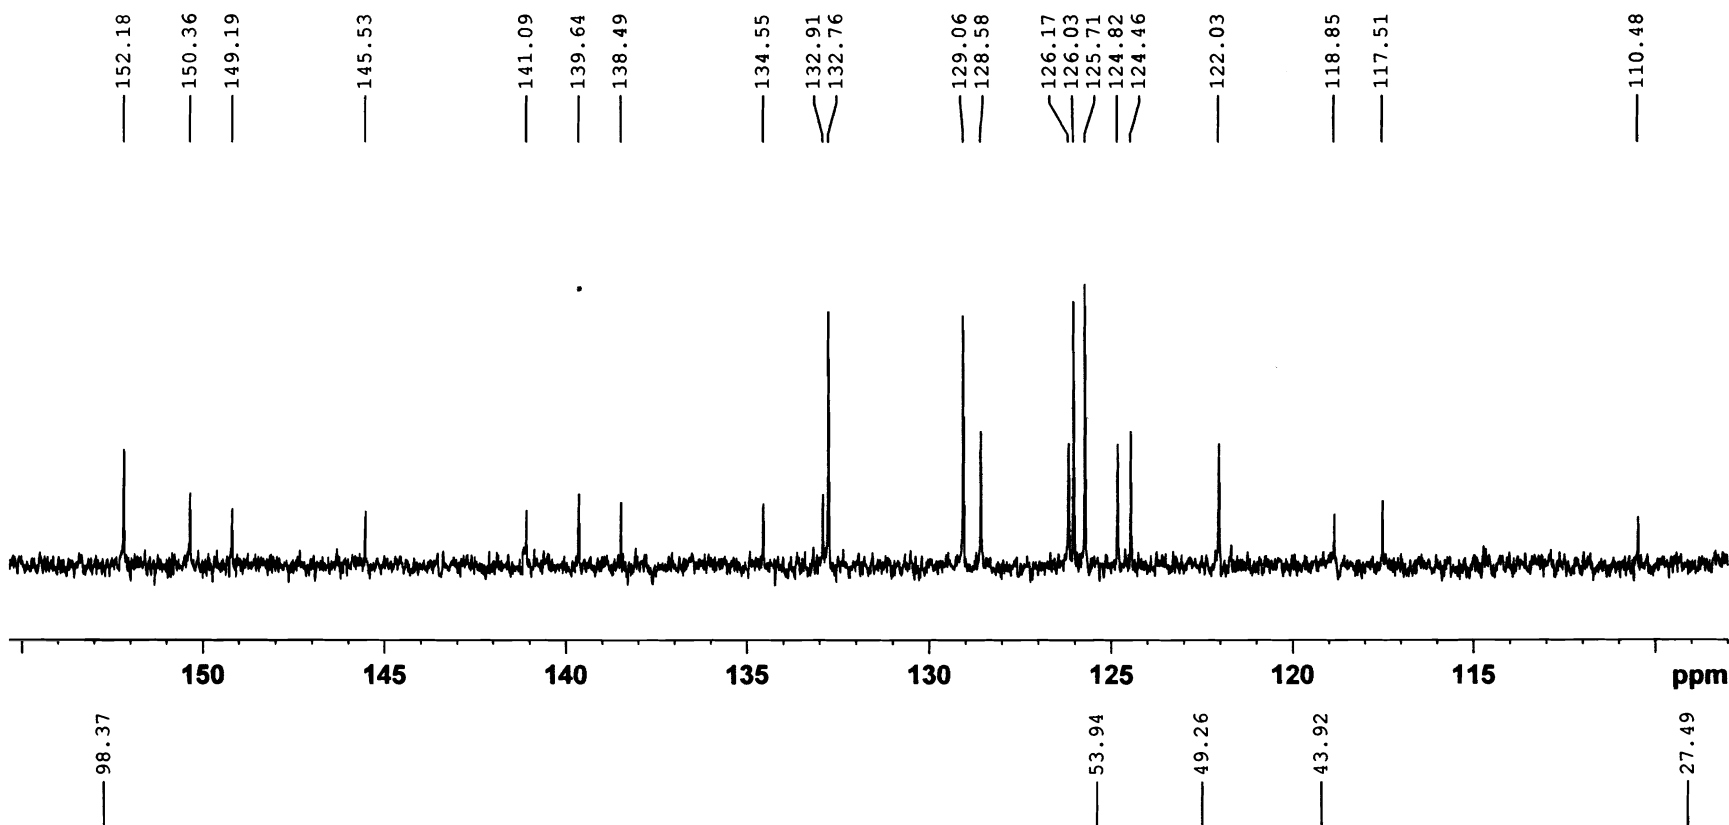

NAME MVAA210a  
EXPNO 2  
PROCNO 1  
Date\_ 20120315  
Time 8.23  
INSTRUM spect  
PROBHD 5 mm BBO BB-1H  
PULPROG zgpg30  
TD 32768  
SOLVENT CDCl3  
NS 148  
DS 4  
SWH 29761.904 Hz  
FIDRES 0.908261 Hz  
AQ 0.5505524 sec  
RG 1030  
DW 16.800 usec  
DE 6.50 usec  
TE 298.0 K  
D1 2.00000000 sec  
D11 0.03000000 sec  
TD0 1

===== CHANNEL f1 =====  
NUC1 13C  
P1 11.50 usec  
PL1 3.00 dB  
PL1W 32.22848892 W  
SFO1 125.8043140 MHz

===== CHANNEL f2 =====  
CPDPRG2 waltz16  
NUC2 1H  
PCPD2 80.00 usec  
PL2 1.20 dB  
PL12 18.40 dB  
PL13 18.40 dB  
PL2W 20.76952171 W  
PL12W 0.39575511 W  
PL13W 0.39575511 W  
SFO2 500.2621871 MHz  
SI 32768  
SF 125.7904800 MHz  
WDW EM  
SSB 0  
LB 1.50 Hz  
GB 0  
PC 1.40

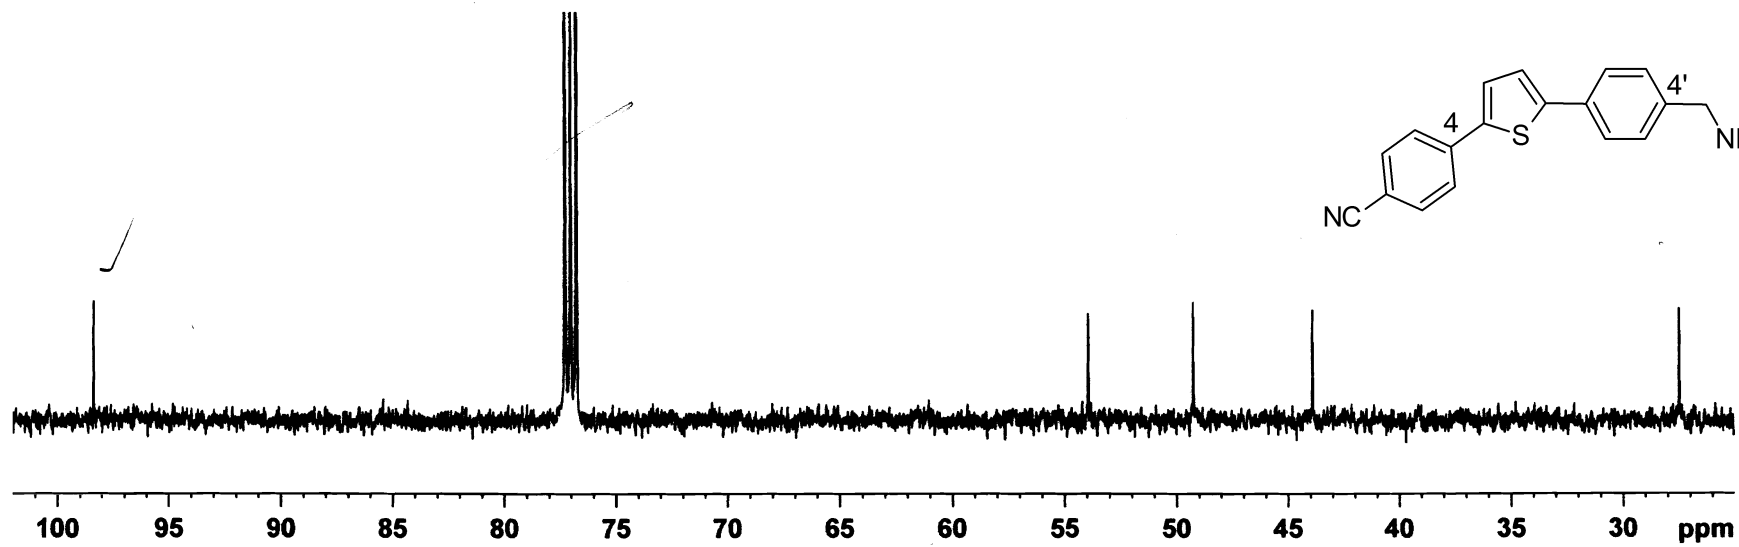

4-(5-{4-[[{4-[(7-chloroquinolin-4-yl)amino]butyl}amino)methyl]phenyl}-2-thienyl)benzonitrile (39)

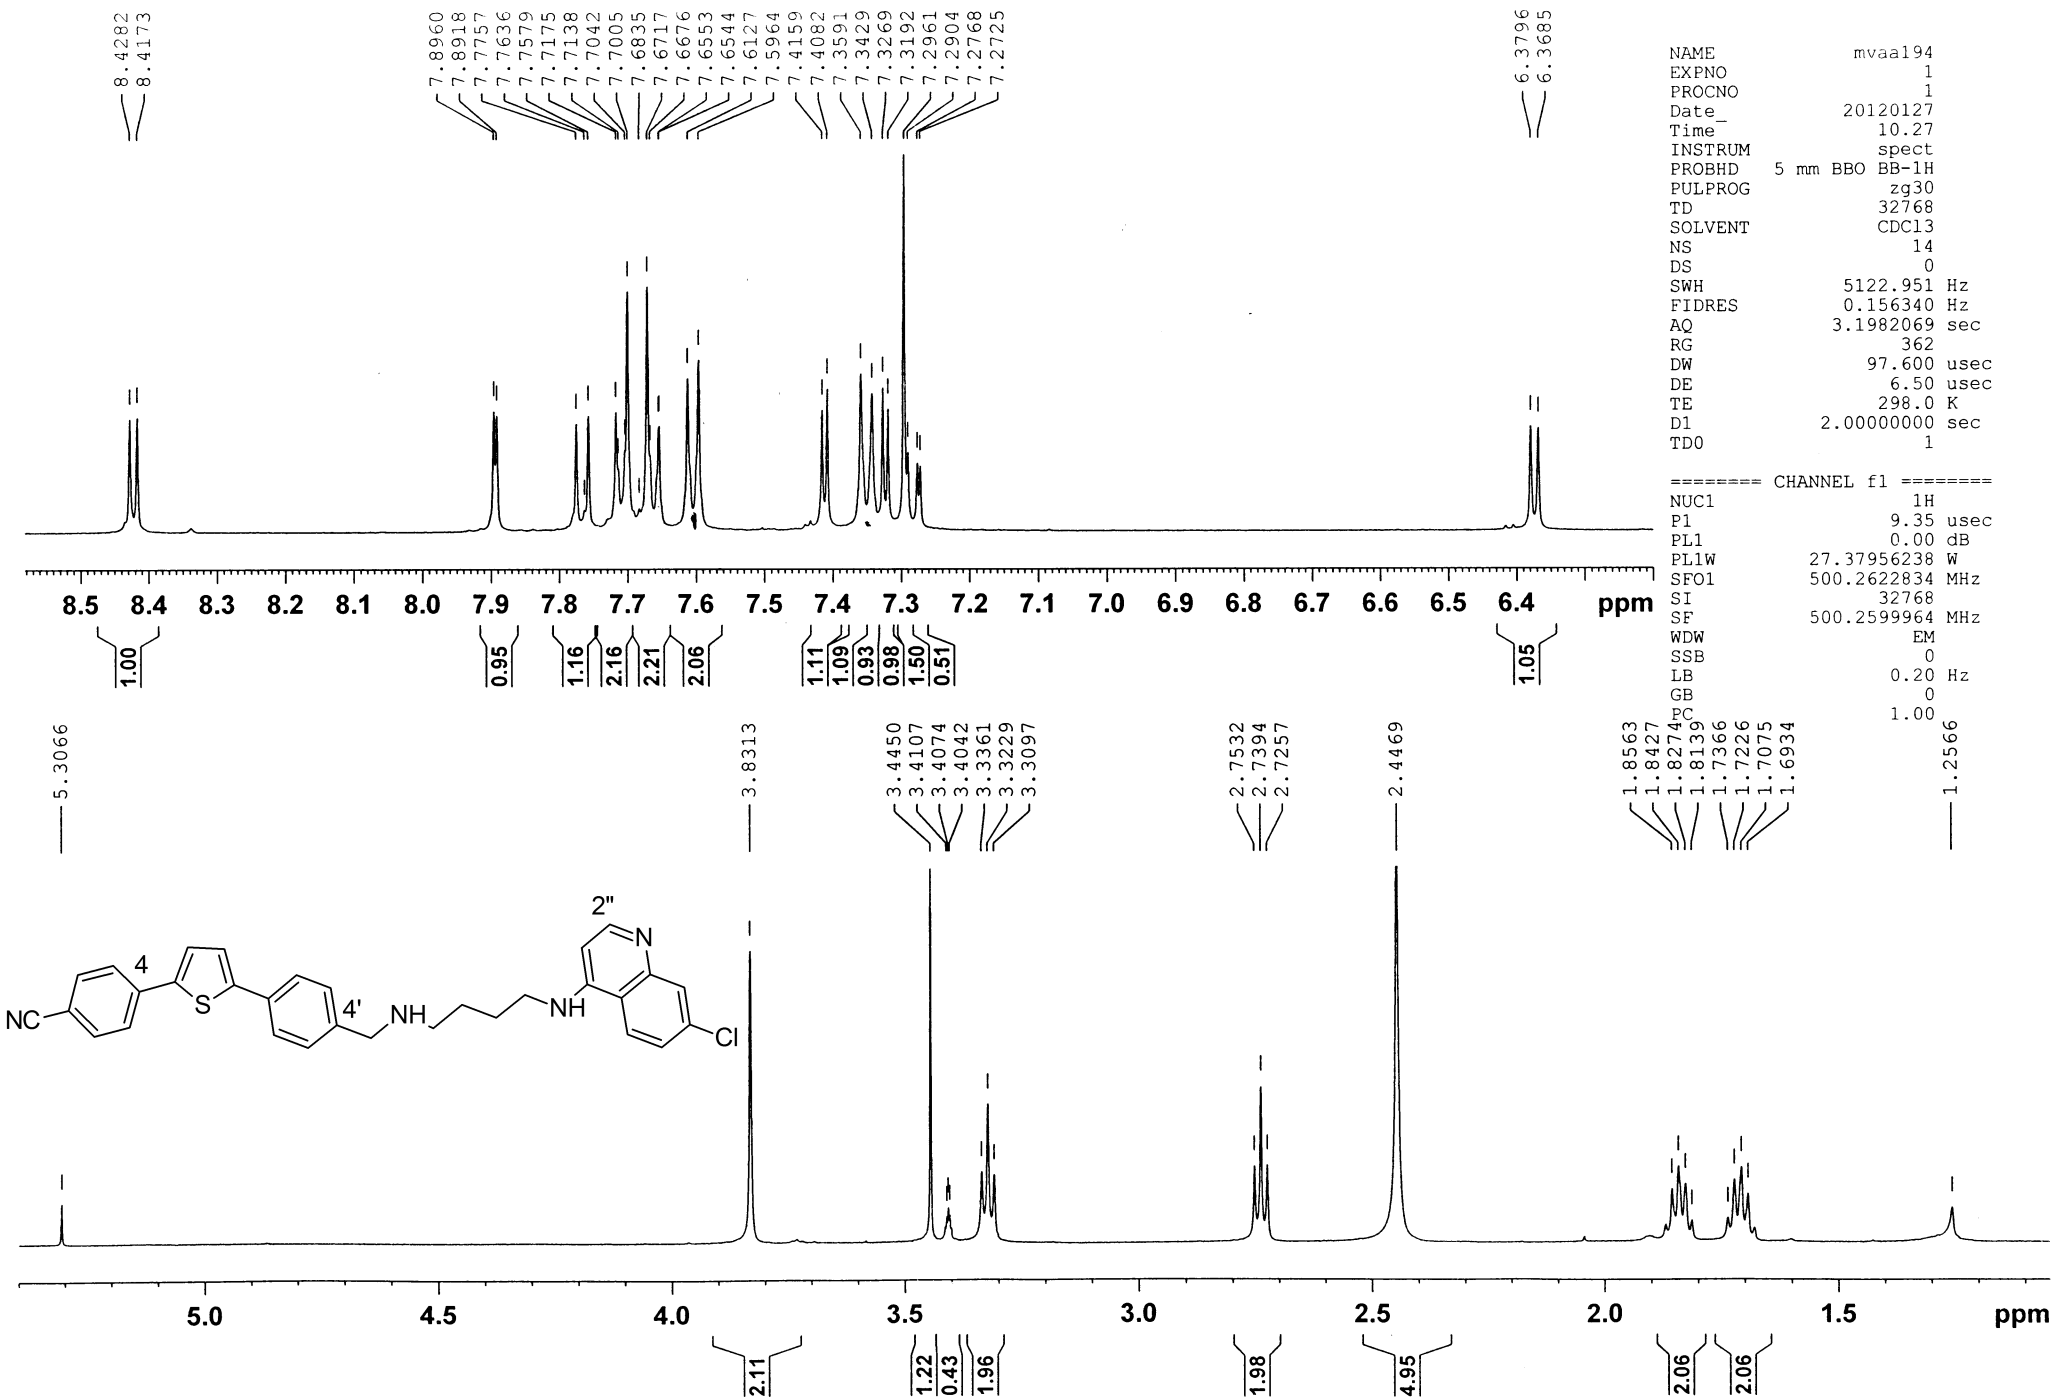

4-(5-{4-[(7-chloroquinolin-4-yl)amino]butyl}amino)methyl]phenyl)-2-thienyl)benzonitrile (39)

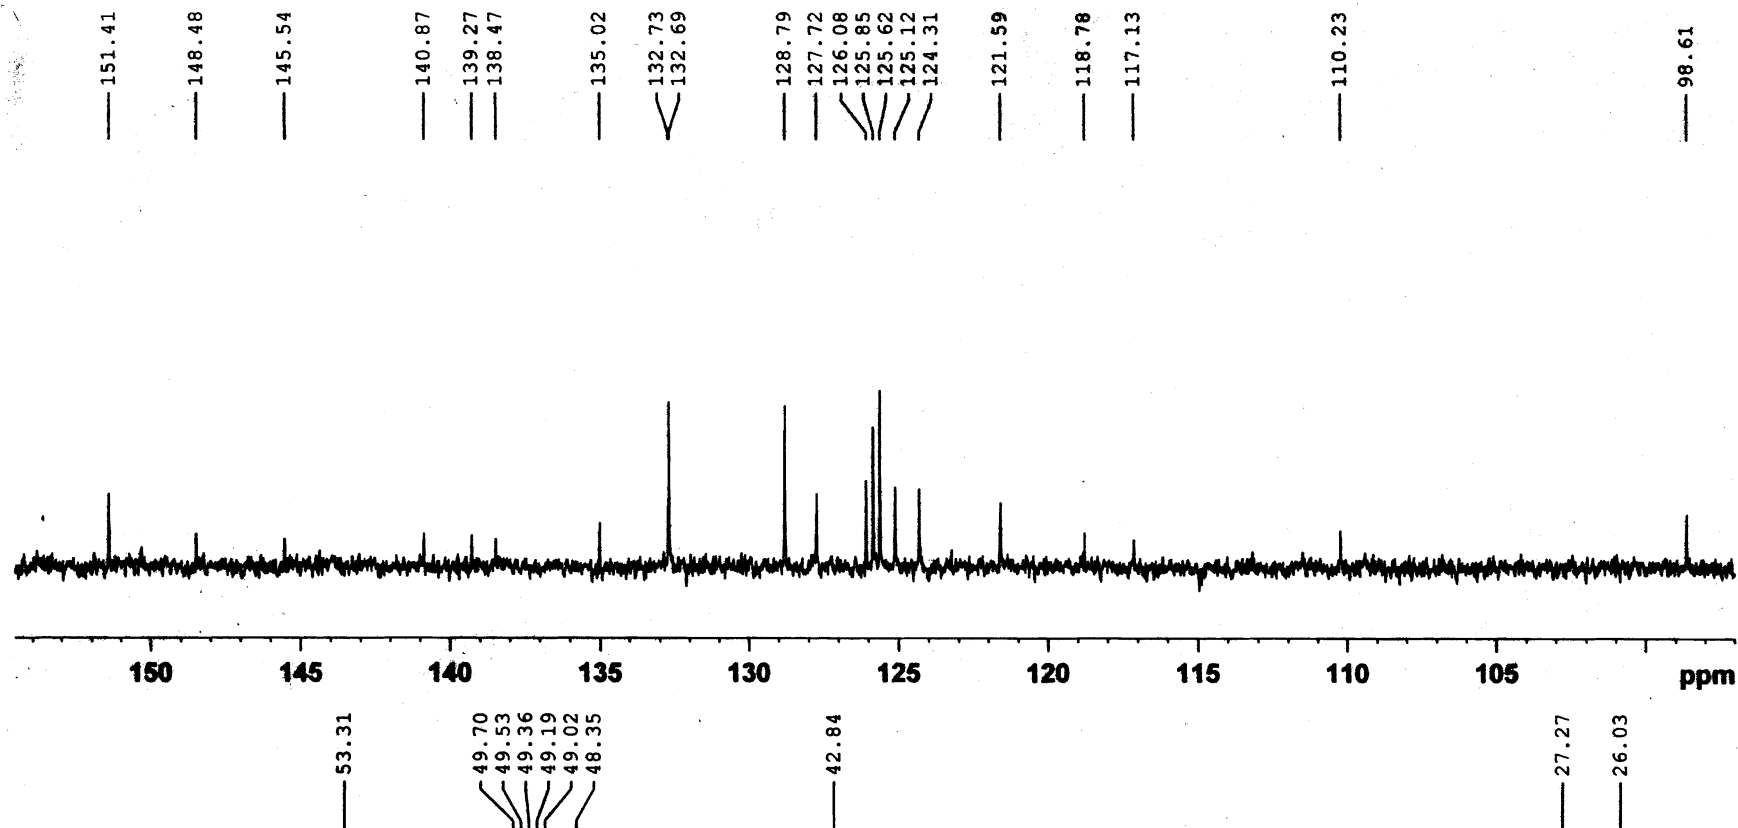

NAME mvaal194  
 EXPNO 6  
 PROCNO 1  
 Date\_ 20120127  
 Time\_ 10.35  
 INSTRUM spect  
 PROBHD 5 mm BBO BB-1H  
 PULPROG zgpg30  
 TD 32768  
 SOLVENT CDCl3  
 NS 221  
 DS 4  
 SWH 29761.904 Hz  
 FIDRES 0.908261 Hz  
 AQ 0.5505524 sec  
 RG 1030  
 DM 16.800 usec  
 DE 6.50 usec  
 TE 298.0 K  
 D1 2.00000000 sec  
 D11 0.03000000 sec  
 TD0 1

===== CHANNEL f1 =====  
 NUC1 13C  
 P1 11.50 usec  
 PL1 3.00 dB  
 PL1W 32.22848892 W  
 SFO1 125.8043140 MHz

===== CHANNEL f2 =====  
 CPDPRG2 waltz16  
 NUC2 1H  
 PCPD2 80.00 usec  
 PL2 1.20 dB  
 PL12 18.40 dB  
 PL13 18.40 dB  
 PL2W 20.76952171 W  
 PL12W 0.39575511 W  
 PL13W 0.39575511 W  
 SFO2 500.2619175 MHz  
 SI 32768  
 SF 125.7904862 MHz  
 WDW EM  
 SSB 0  
 LB 1.50 Hz  
 GB 0  
 PC 1.40

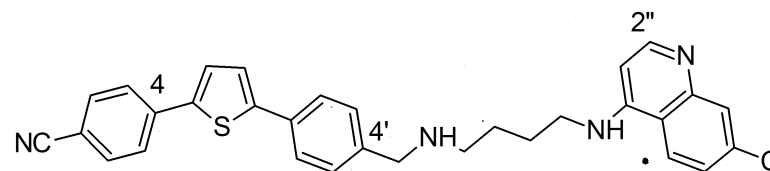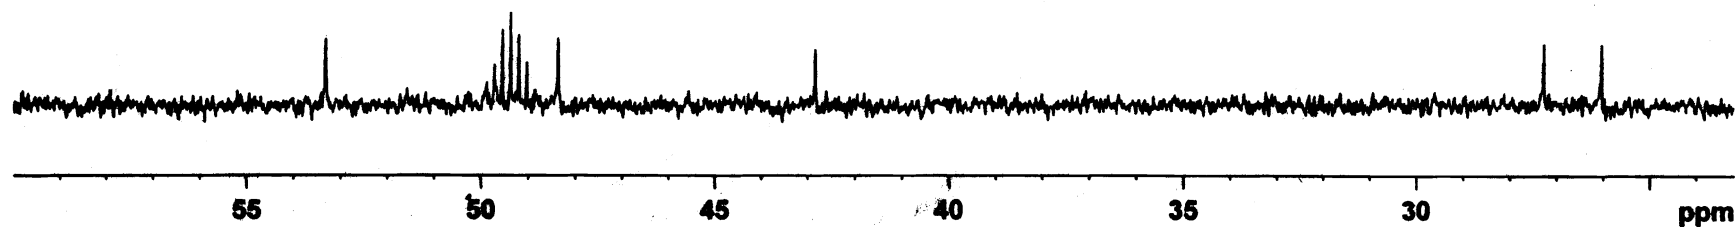

4-(5-[(7-chloroquinolin-4-yl)amino]pentyl)amino)methyl]phenyl)-2-thienyl)benzonitrile (40)

MVA151 SA AQS

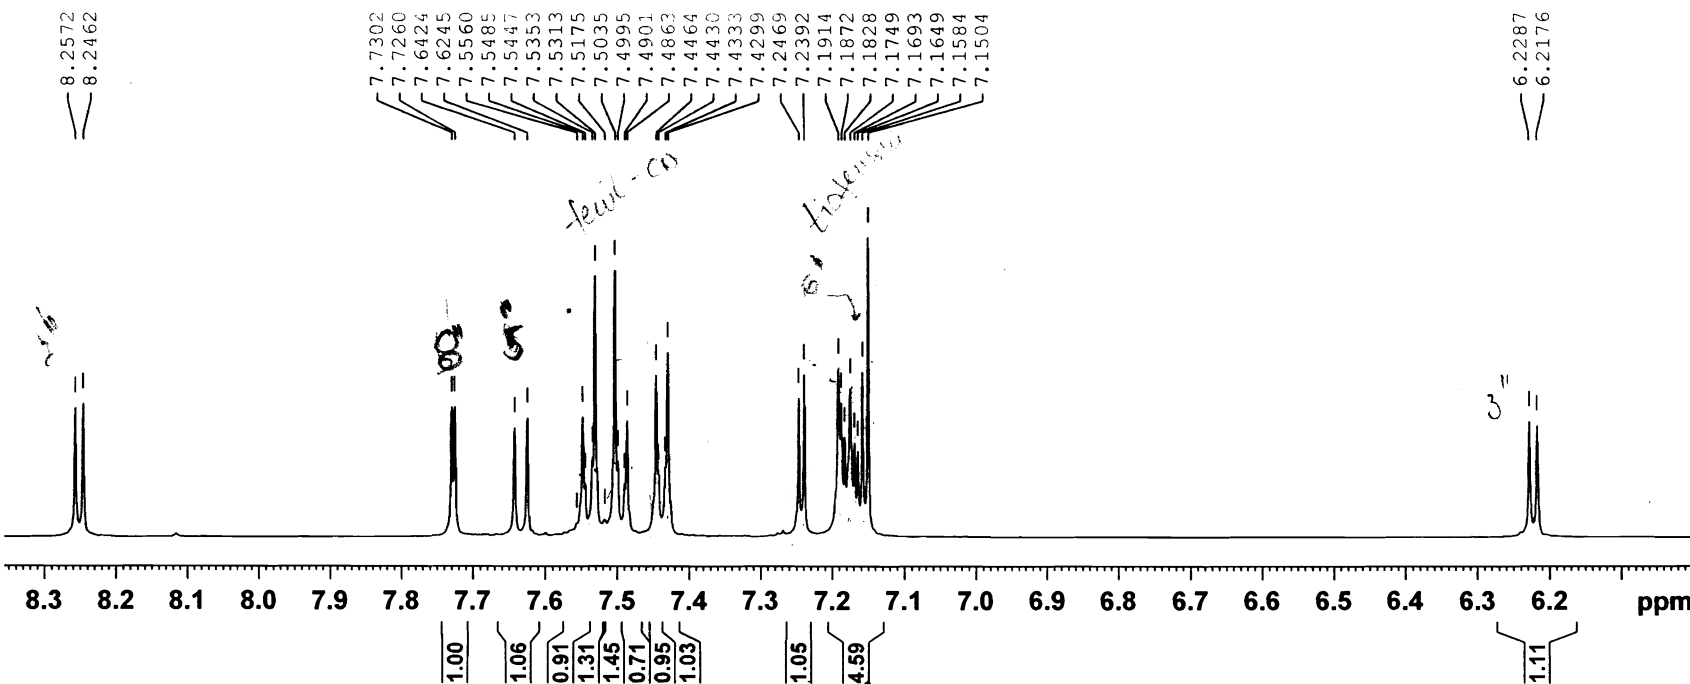

NAME MVA208  
EXPNO 1  
PROCNO 1  
Date 20120312  
Time 10.00  
INSTRUM spect  
PROBHD 5 mm BBO BB-1H  
PULPROG zg30  
TD 32768  
SOLVENT CDCl3  
NS 16  
DS 0  
SWH 5555.556 Hz  
FIDRES 0.169542 Hz  
AQ 2.9491701 sec  
RG 322  
DW 90.000 usec  
DE 6.50 usec  
TE 298.0 K  
D1 2.0000000 sec  
TD0 1

===== CHANNEL f1 =====  
NUC1 1H  
P1 9.35 usec  
PL1 0.00 dB  
PL1W 27.37956238 W  
SFO1 500.2623221 MHz  
SI 32768  
SF 500.2600689 MHz  
WDW EM  
SSB 0  
LB 0.20 Hz  
GB 0  
PC 1.00

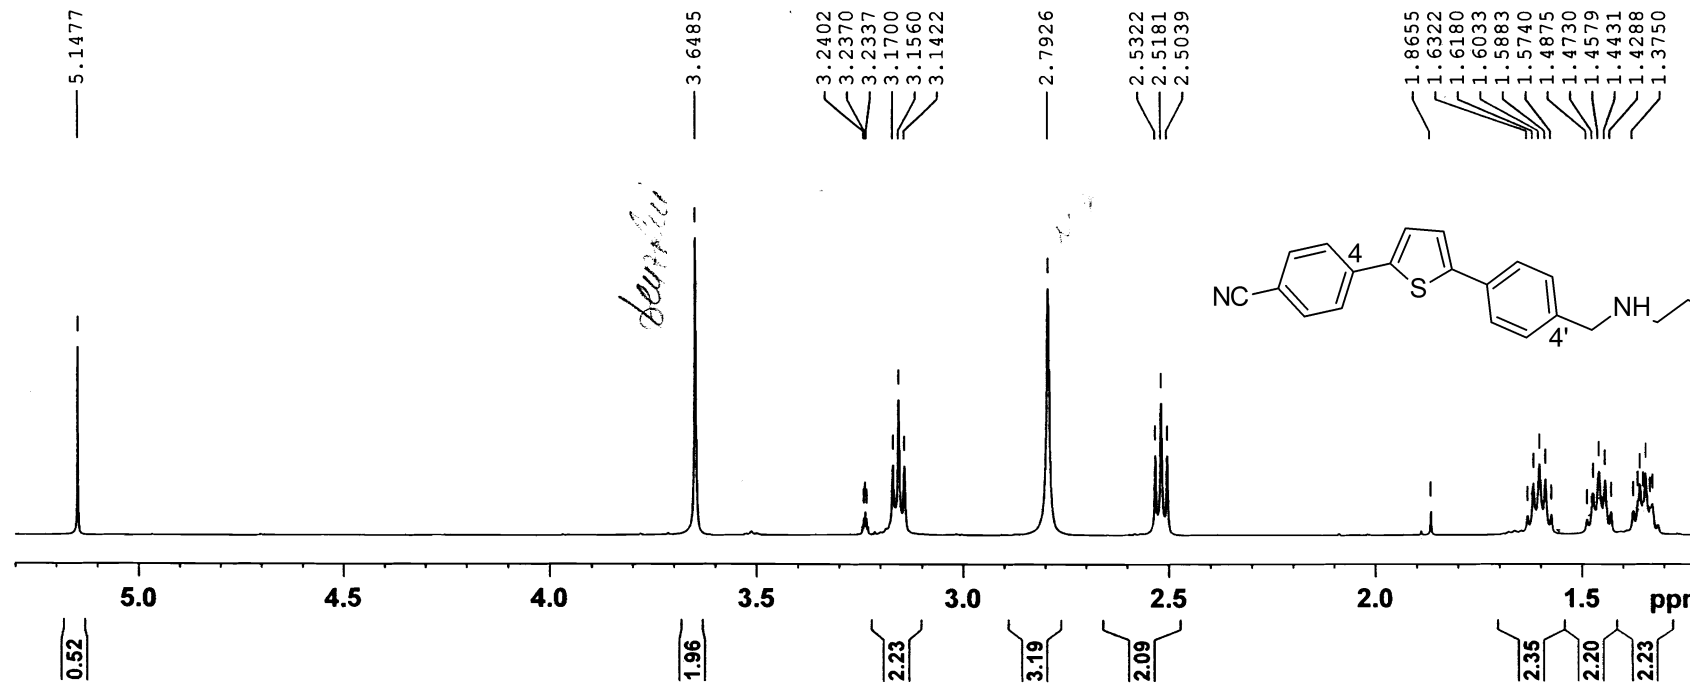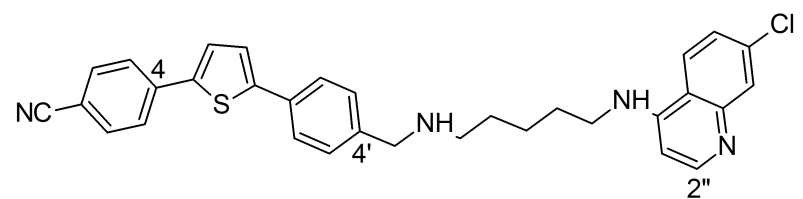

4-(5-[[4-[[[(7-chloroquinolin-4-yl)amino]pentyl]amino)methyl]phenyl]-2-thienyl)benzonitrile (40)

NAME MVAA208  
EXPNO 2  
PROCNO 1  
Date\_ 20120312  
Time 10.04  
INSTRUM spect  
PROBHD 5 mm BBO BB-1H  
PULPROG zgpg30  
TD 32768  
SOLVENT CDC13  
NS 100  
DS 4  
SWH 29761.904 Hz  
FIDRES 0.908261 Hz  
AQ 0.5505524 sec  
RG 1030  
DW 16.800 usec  
DE 6.50 usec  
TE 298.0 K  
D1 2.00000000 sec  
D11 0.03000000 sec  
TD0 1

===== CHANNEL f1 =====  
NUC1 13C  
P1 11.50 usec  
PL1 3.00 dB  
PL1W 32.22848892 W  
SFO1 125.8030560 MHz

===== CHANNEL f2 =====  
CPDPRG2 waltz16  
NUC2 1H  
PCPD2 80.00 usec  
PL2 1.20 dB  
PL12 18.40 dB  
PL13 18.40 dB  
PL2W 20.76952171 W  
PL12W 0.39575511 W  
PL13W 0.39575511 W  
SFO2 500.2621271 MHz  
SI 32768  
SF 125.7904891 MHz  
WDW EM  
SSB 0  
LB 1.50 Hz  
GB 0  
PC 1.40

151.22  
150.22  
148.32  
145.52  
140.76  
139.23  
138.45  
135.02  
132.64  
128.82  
127.58  
126.06  
125.76  
125.56  
125.13  
124.25  
121.49  
118.75  
117.03  
110.12  
98.60

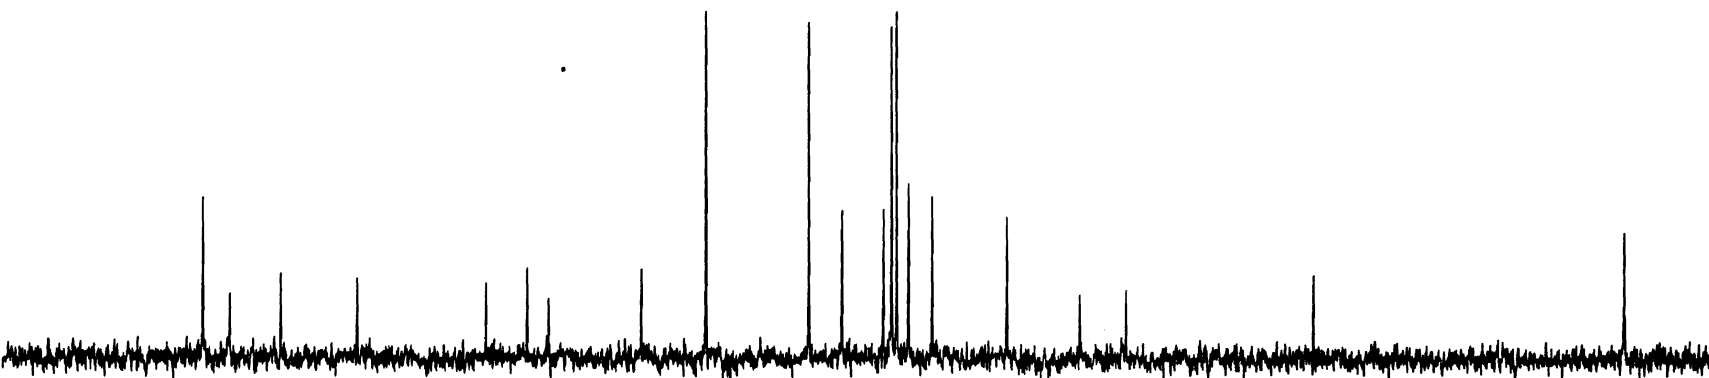

155 150 145 140 135 130 125 120 115 110 105 100 ppm

53.21  
49.50  
49.33  
49.16  
48.99  
48.82  
48.54  
42.73  
29.08  
28.09  
24.53

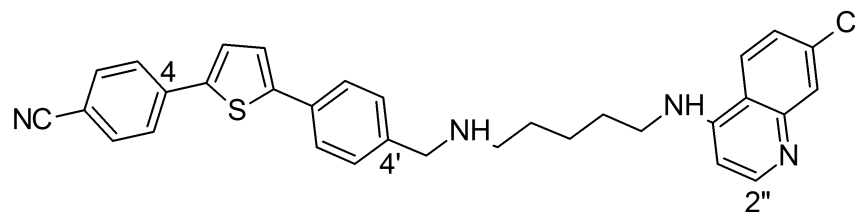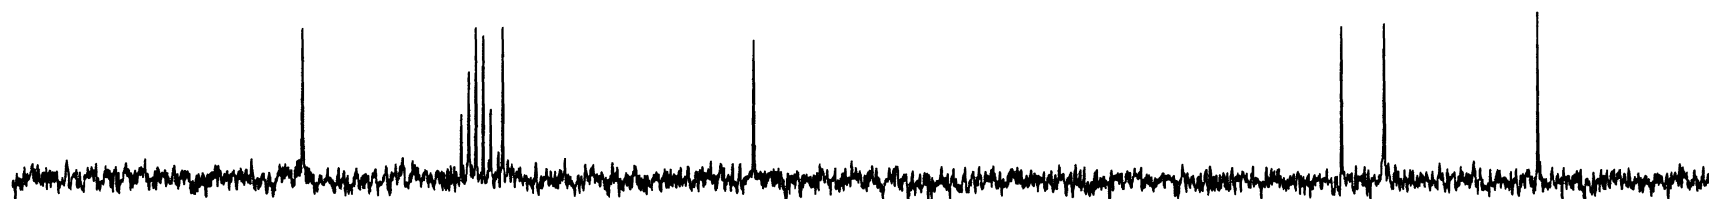

55 50 45 40 35 30 25 ppm



4-(5-{4-[(6-{(7-chloroquinolin-4-yl)amino)hexyl]amino)methyl]phenyl}-2-thienyl)benzonitrile (41)

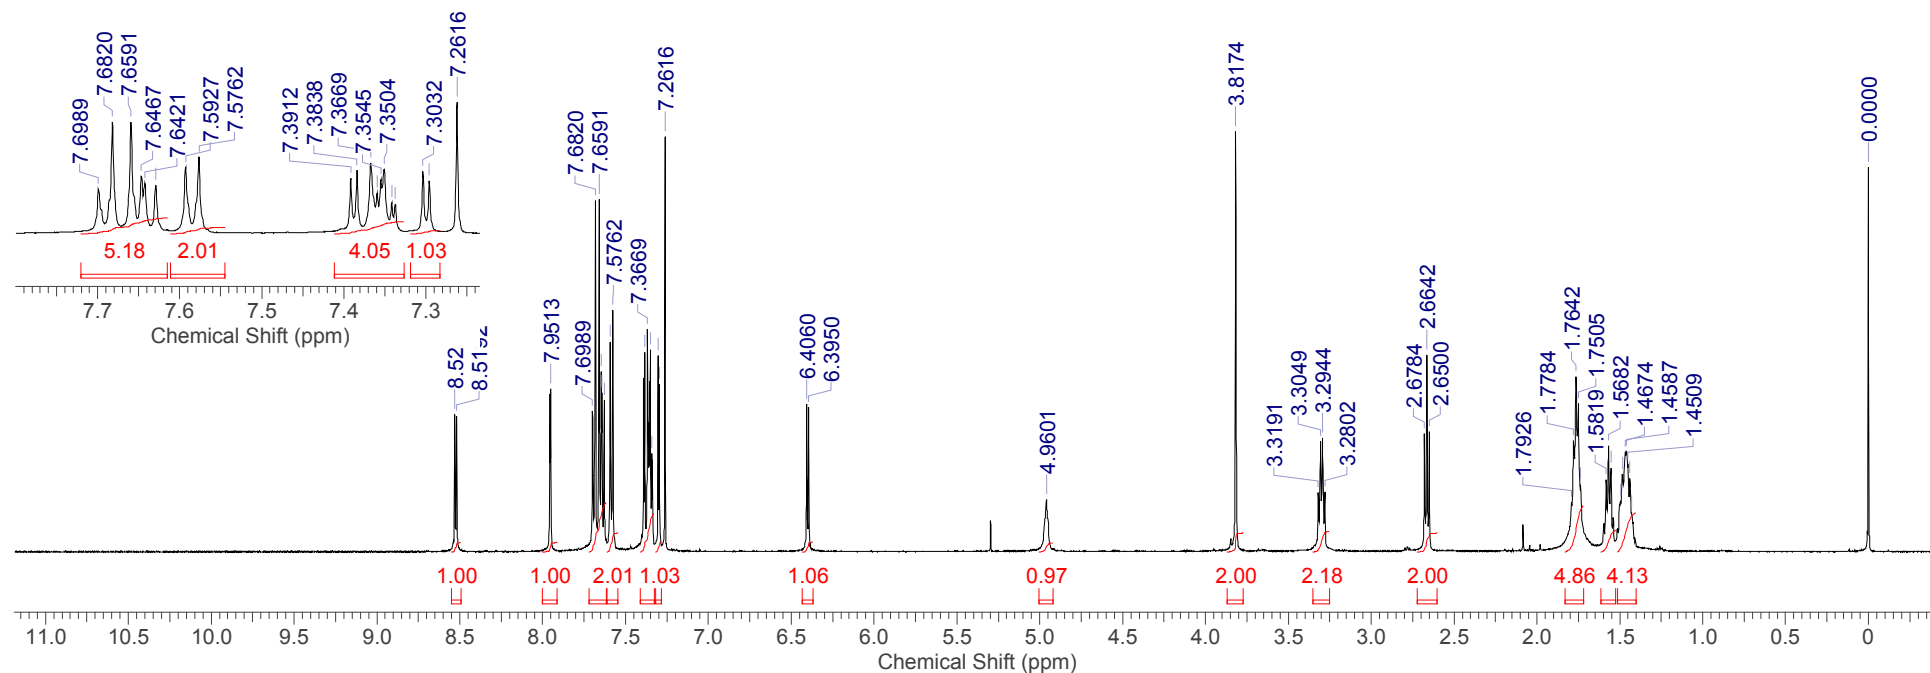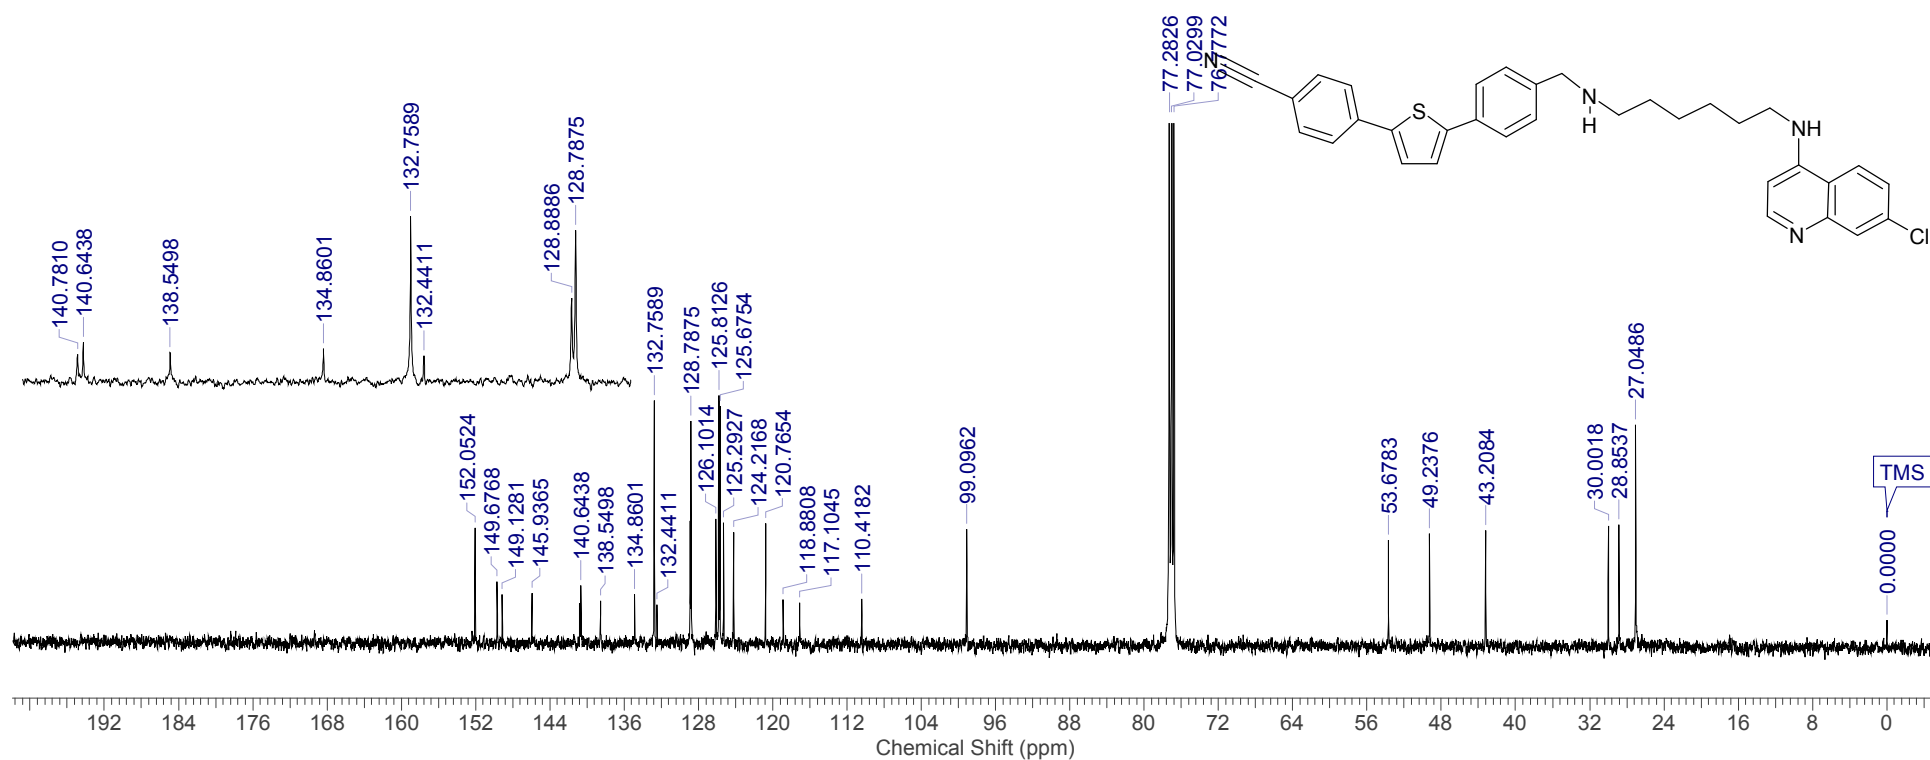

4-(5-{4-[(8-[(7-chloroquinolin-4-yl)amino]octyl)amino)methyl]phenyl}-2-thienyl)benzonitrile (42)

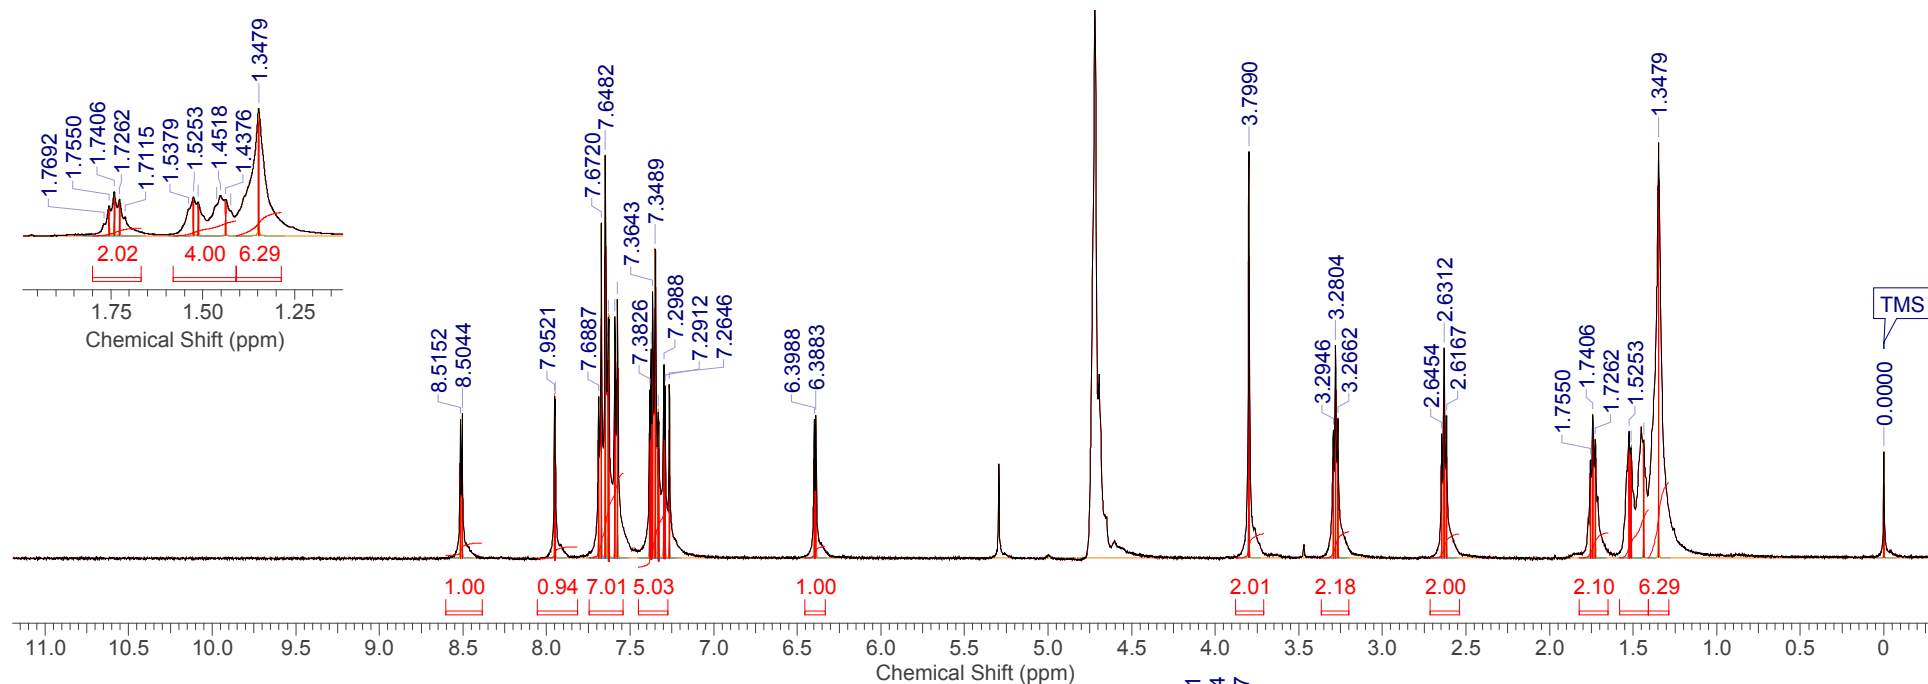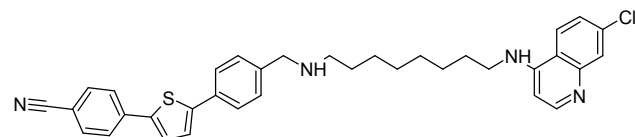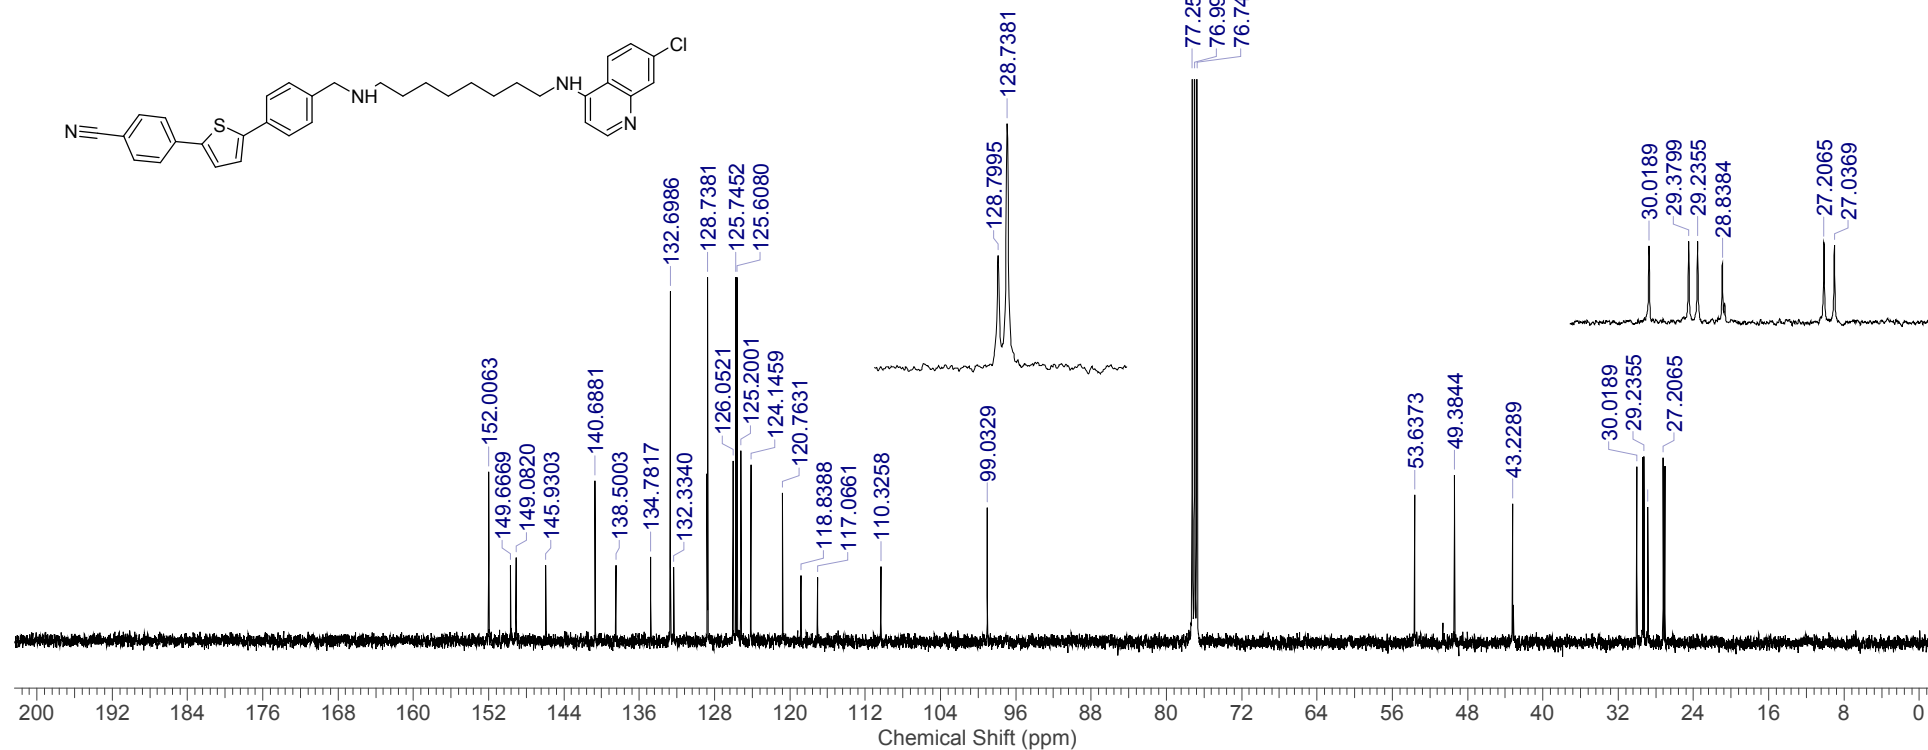

4-{5-[4-({[4-(quinolin-4-ylamino)butyl]amino}methyl)phenyl]-2-thienyl}benzonitrile (43)

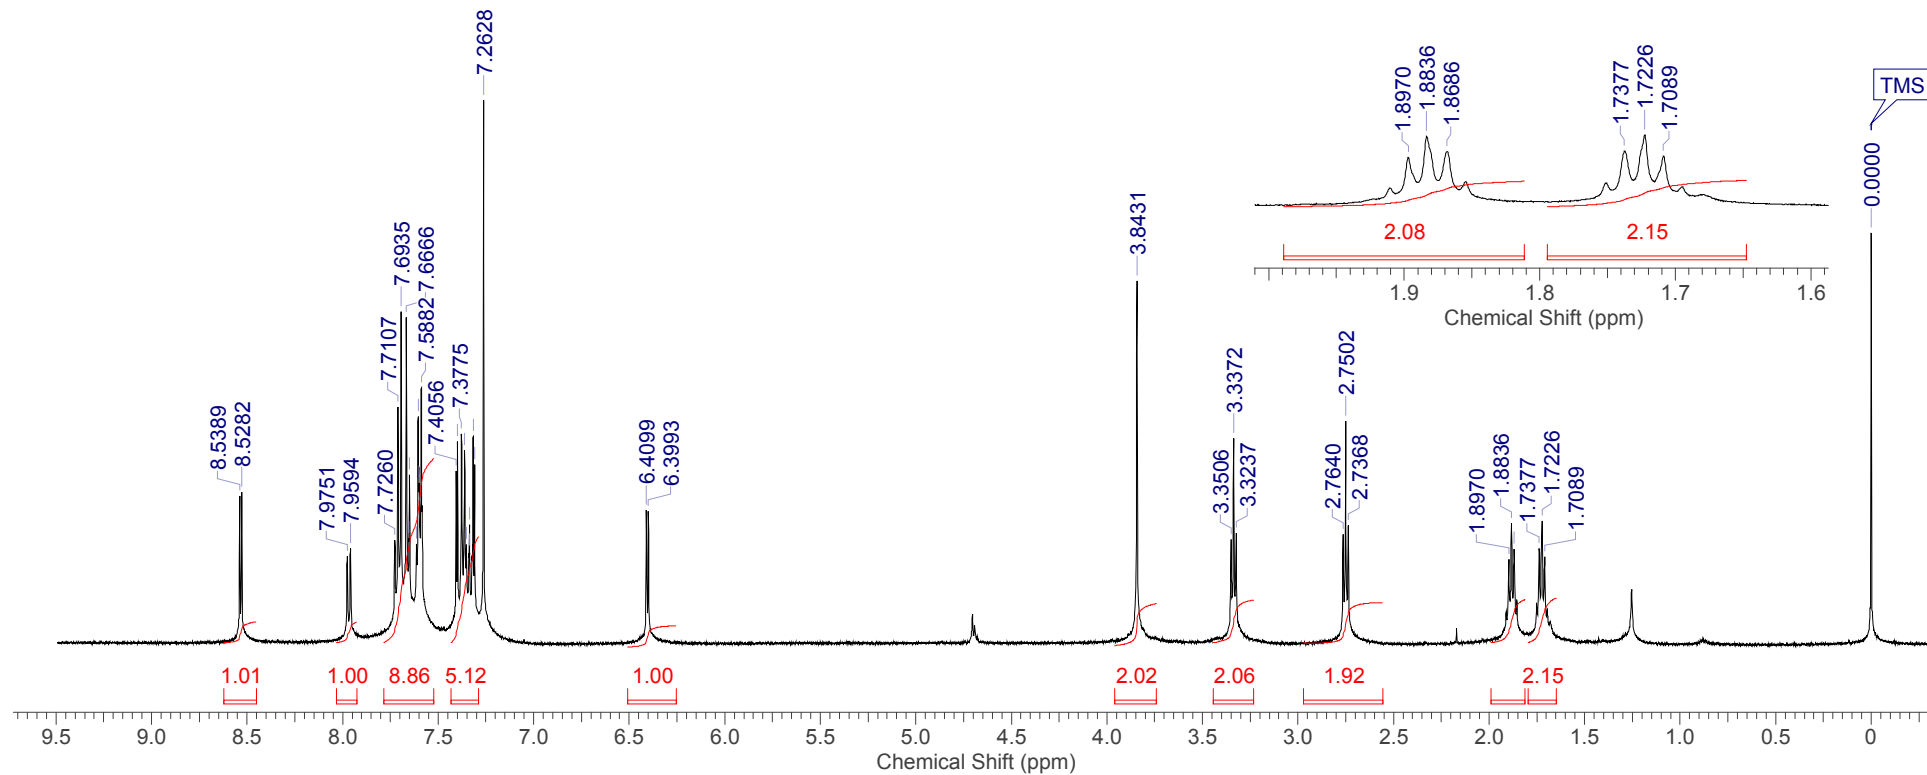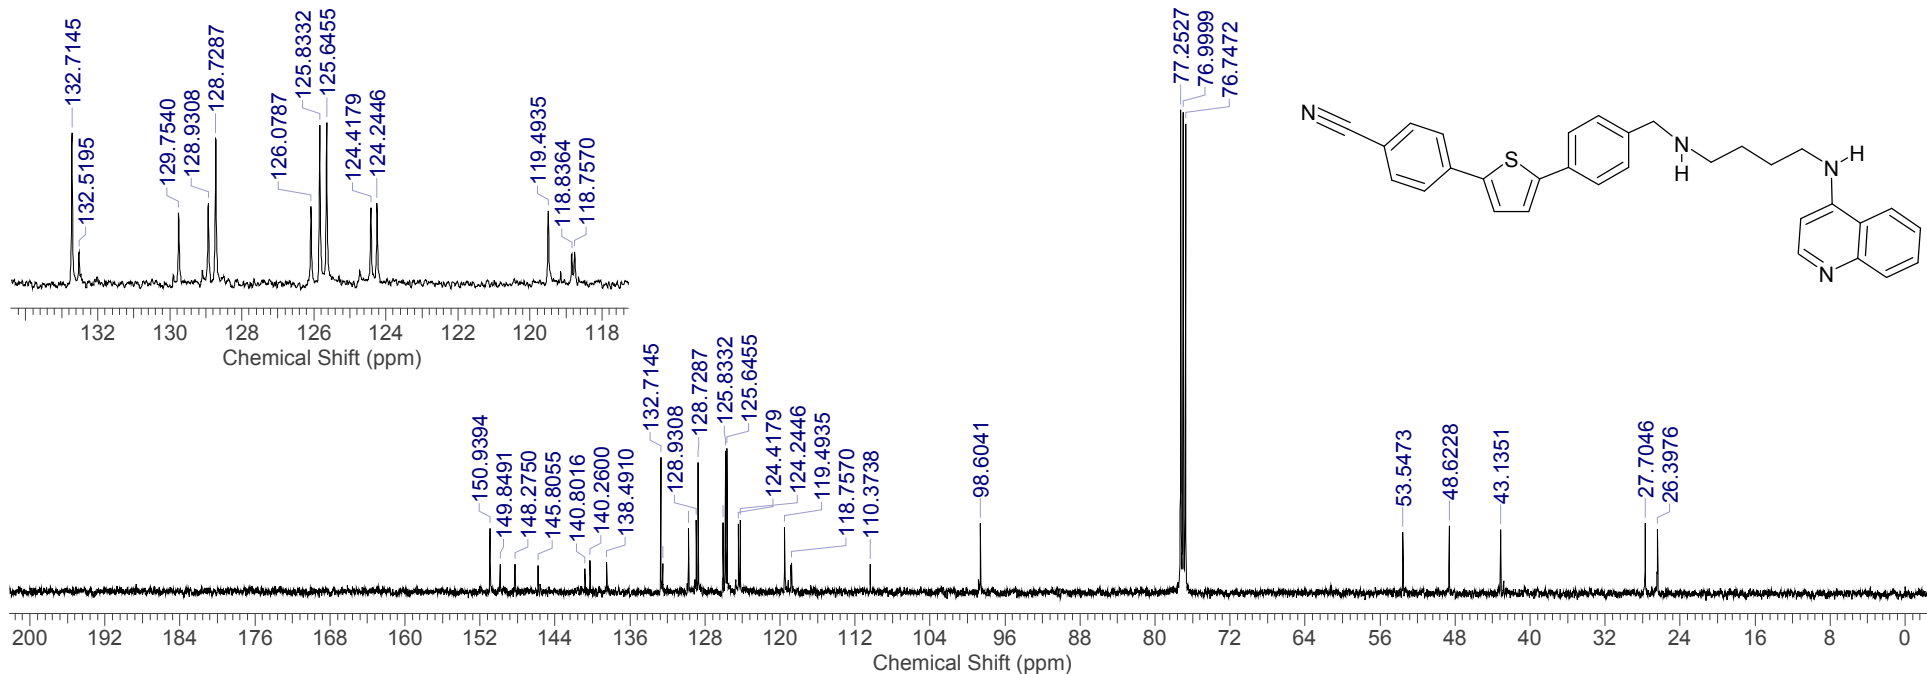

**4-{5-[4-({[6-(quinolin-4-ylamino)hexyl]amino)methyl}phenyl]-2-thienyl}benzonitrile (44)**

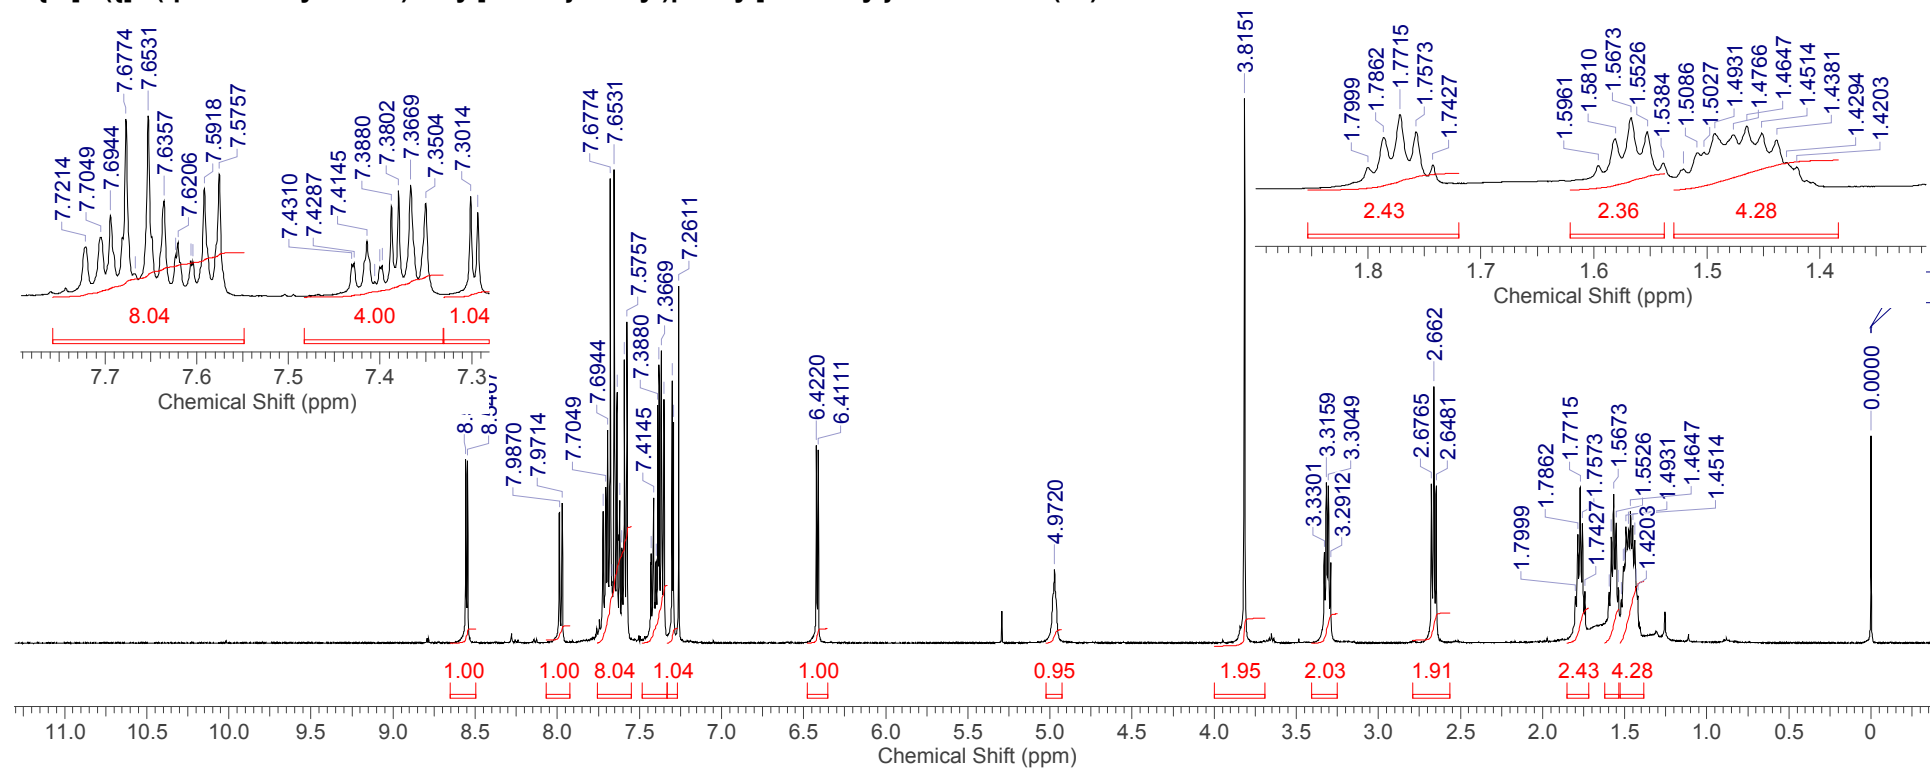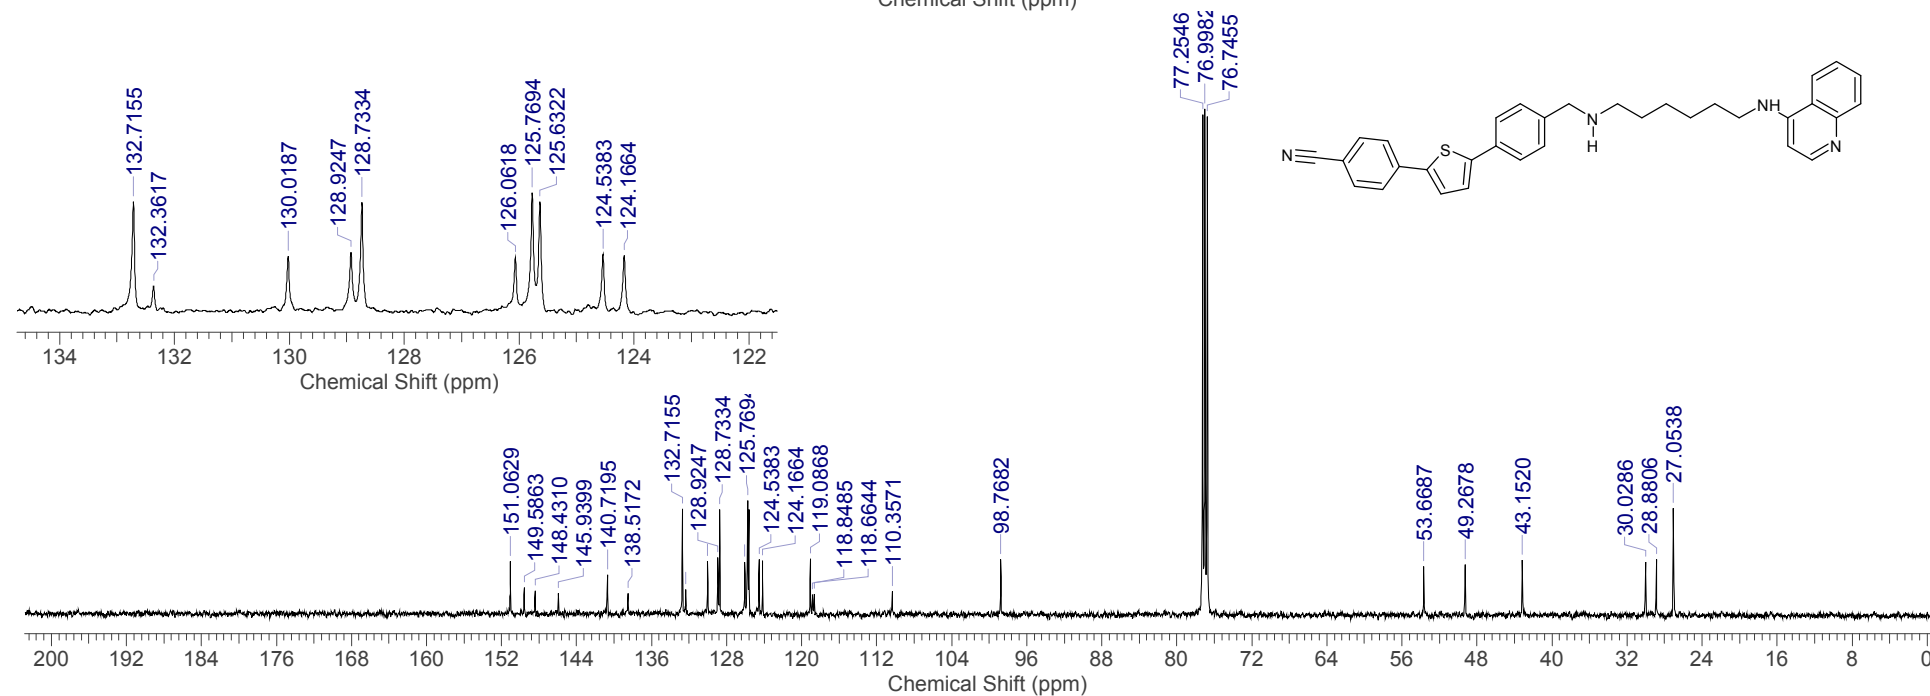

4-{5-[4-({methyl}[8-(quinolin-4-ylamino)octyl]amino)methyl]phenyl]-2-thienyl}benzonitrile (46)

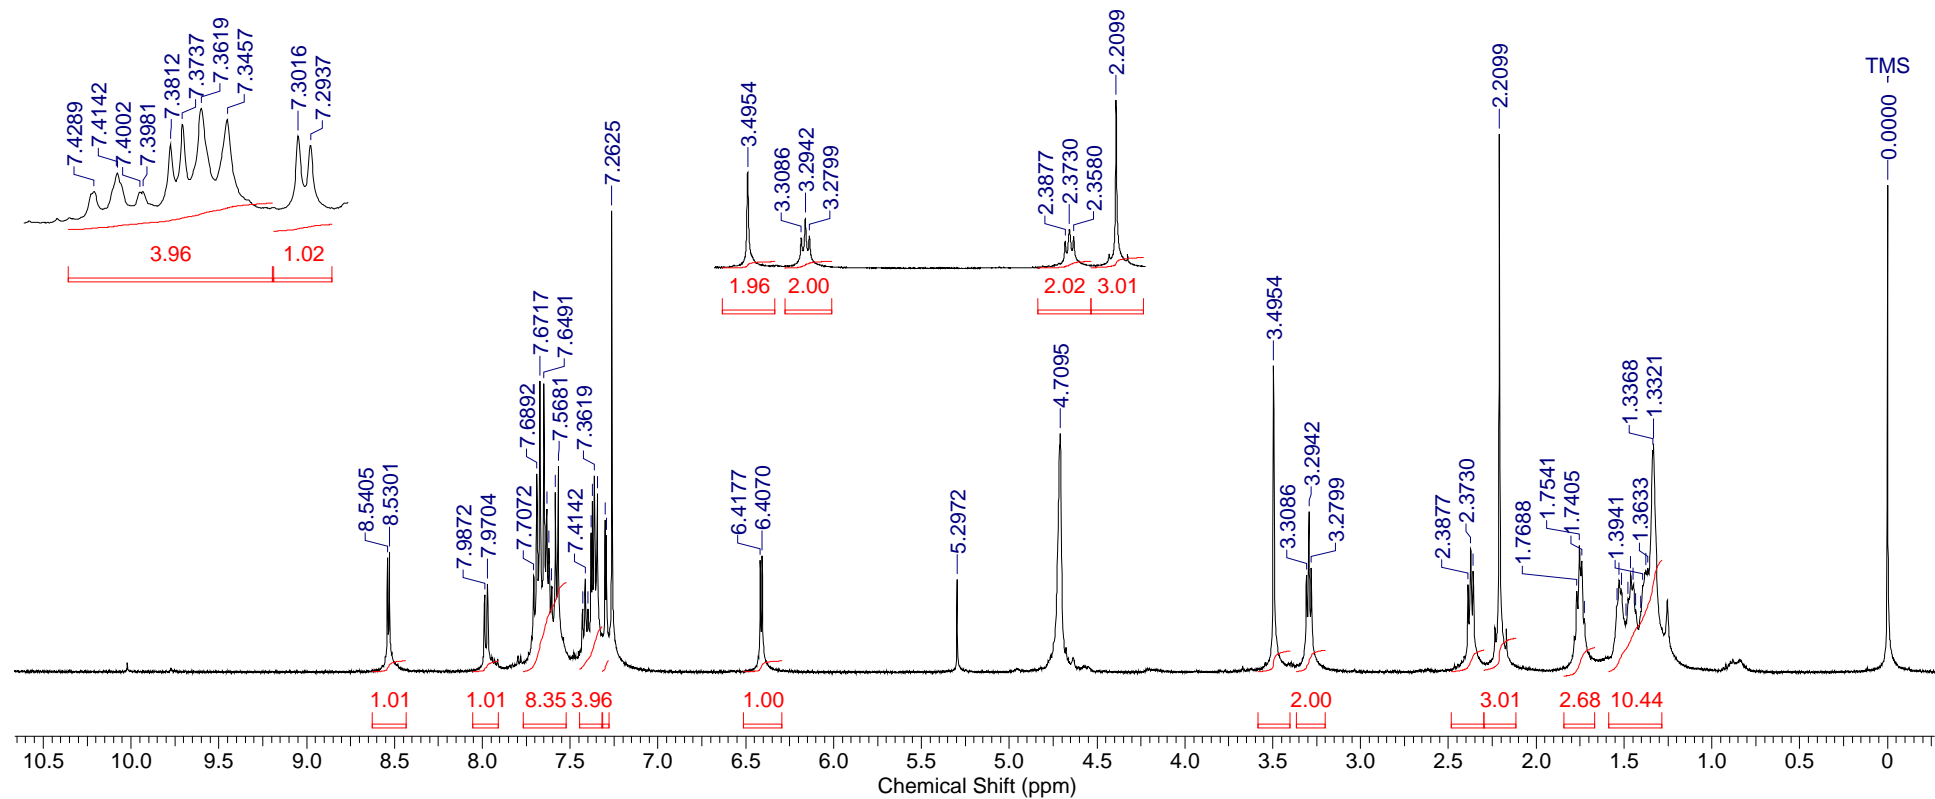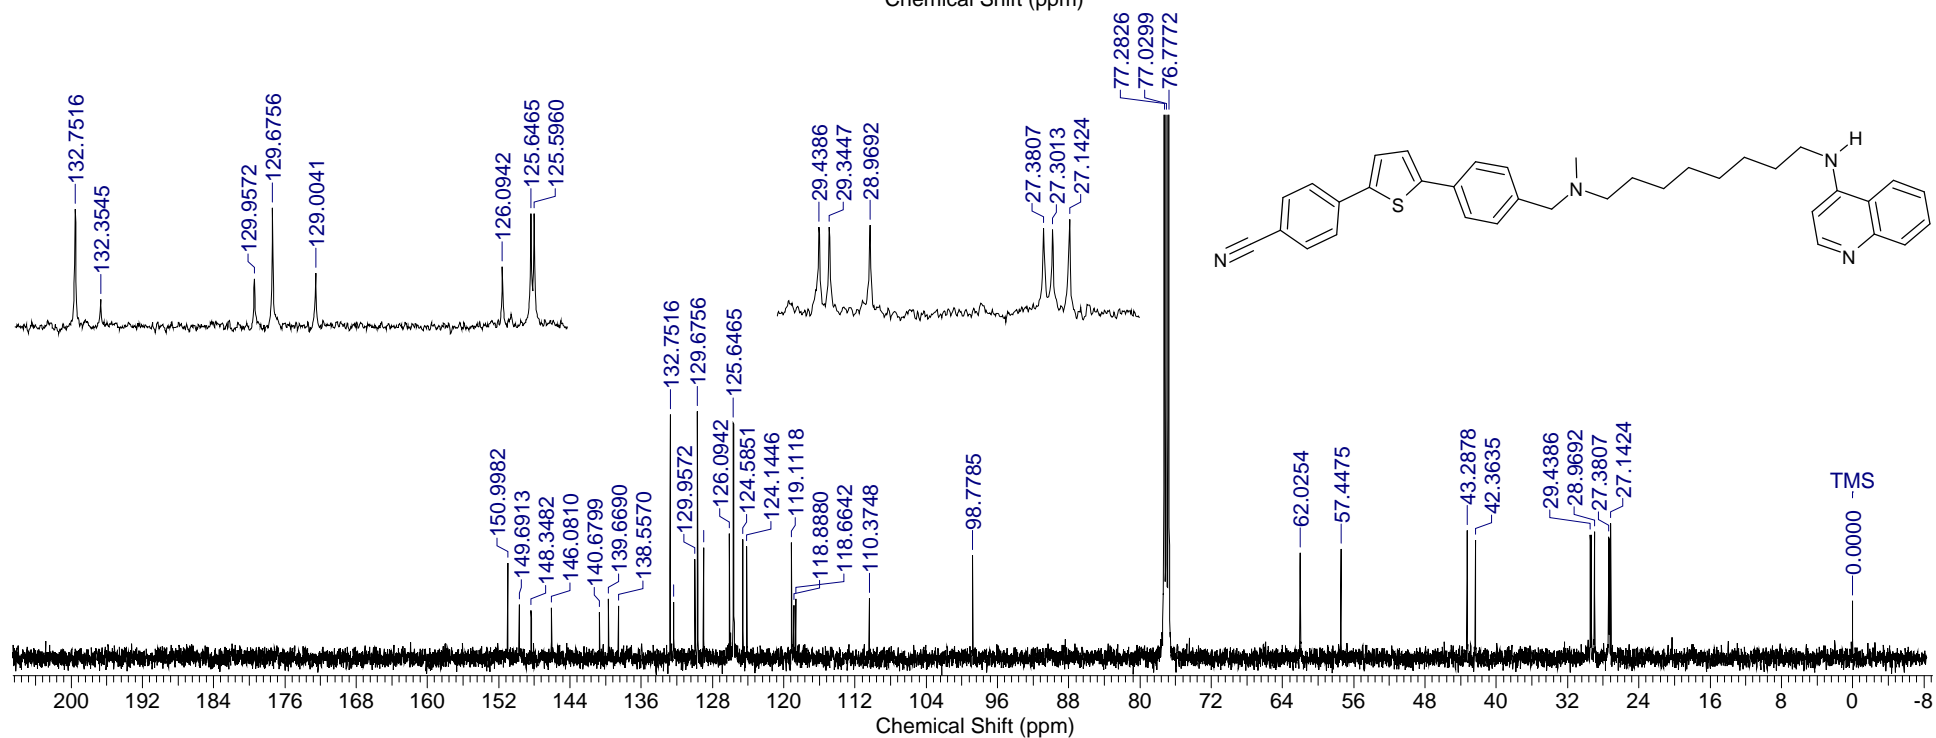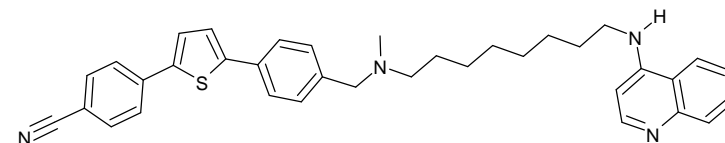

**N-{4-[5-(4-ethynylphenyl)-2-thienyl]benzyl}-N'-quinolin-4-yl-octane-1,8-diamine (52)**

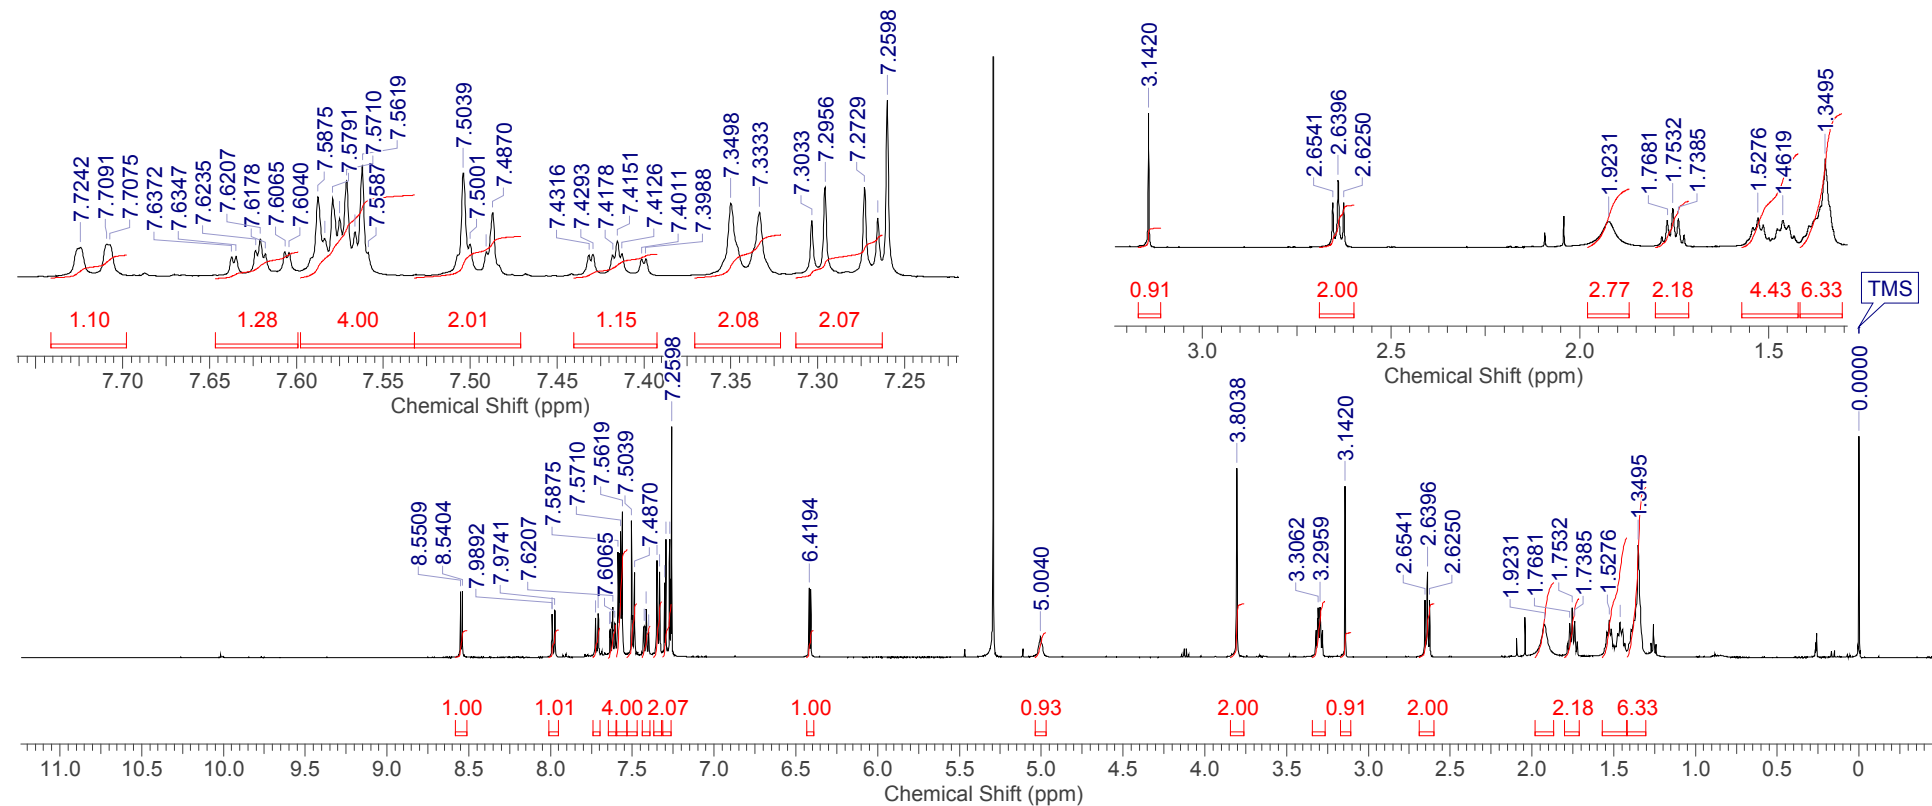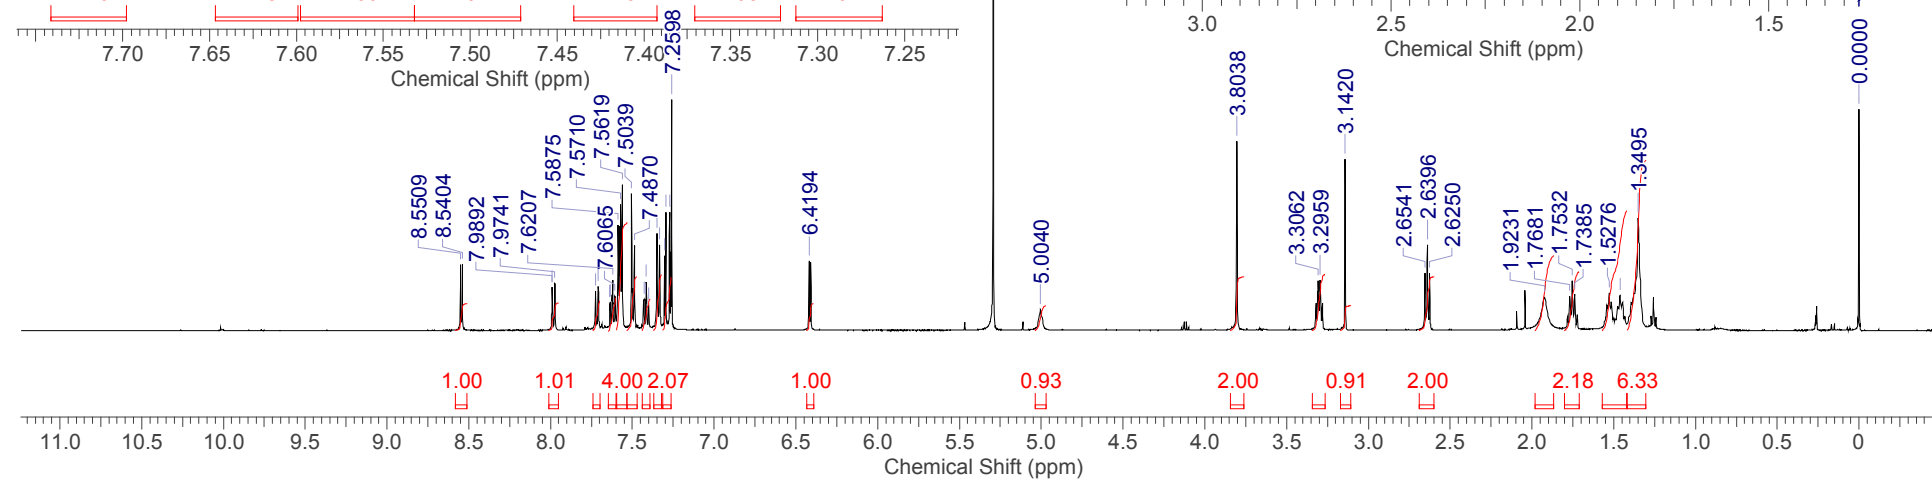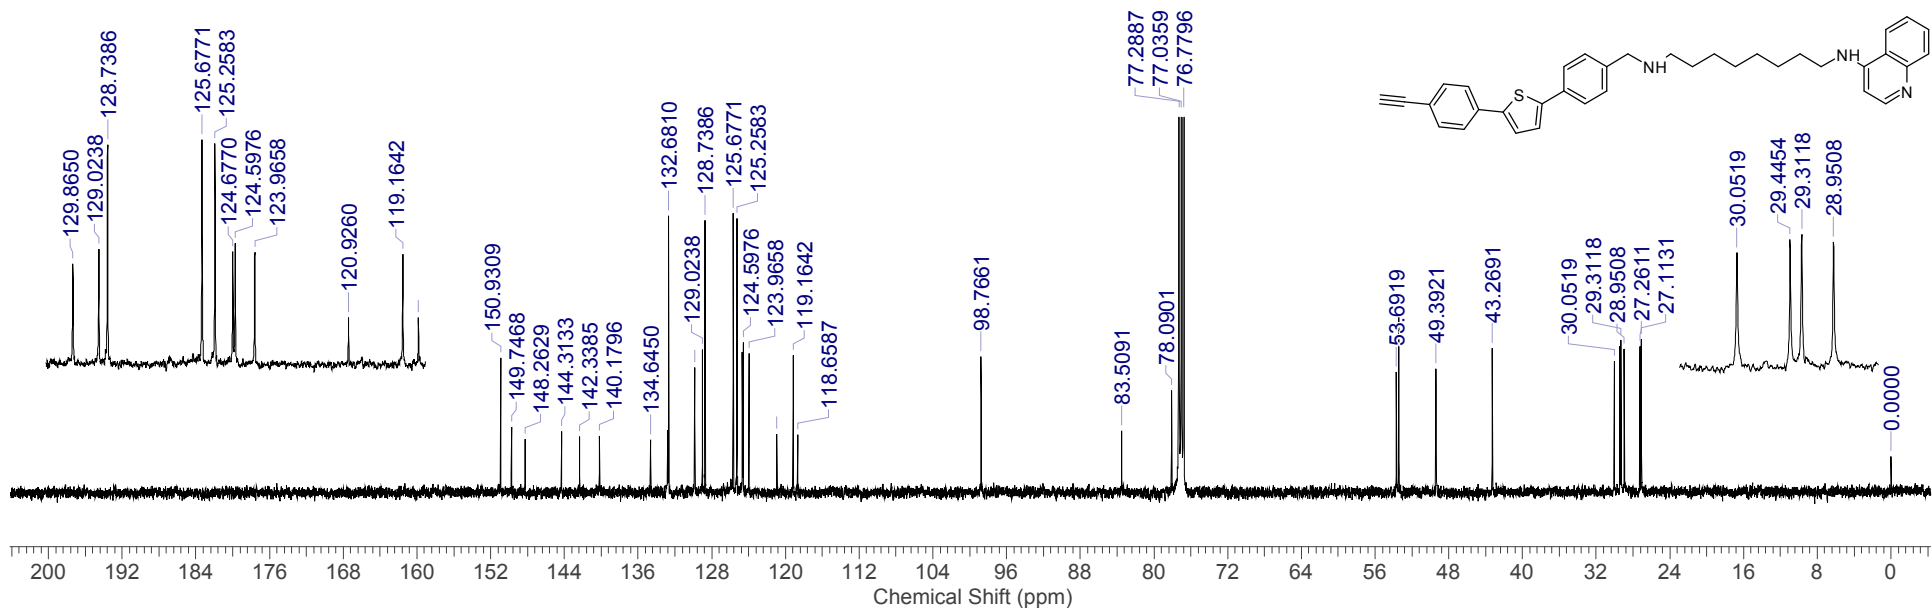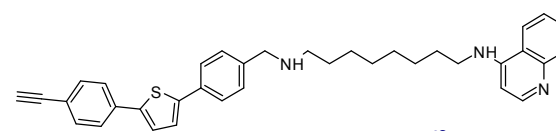

## Compound: 8

### Method A

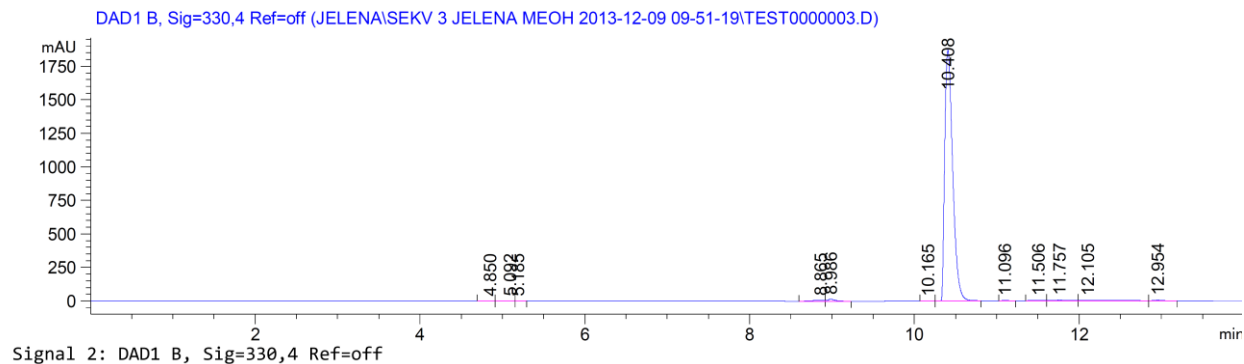

| Peak # | RetTime [min] | Type | Width [min] | Area [mAU*s] | Height [mAU] | Area %  |
|--------|---------------|------|-------------|--------------|--------------|---------|
| 1      | 4.850         | BV   | 0.1185      | 12.05899     | 1.20222      | 0.0931  |
| 2      | 5.092         | VV   | 0.1232      | 22.98553     | 2.21302      | 0.1774  |
| 3      | 5.185         | VB   | 0.0602      | 6.02563      | 1.29629      | 0.0465  |
| 4      | 8.865         | BV   | 0.1306      | 68.79704     | 6.28988      | 0.5310  |
| 5      | 8.986         | VB   | 0.0933      | 89.84259     | 14.59206     | 0.6934  |
| 6      | 10.165        | BV   | 0.0758      | 12.86007     | 2.44710      | 0.0992  |
| 7      | 10.408        | VV   | 0.1058      | 1.25434e4    | 1869.86841   | 96.8059 |
| 8      | 11.096        | BB   | 0.0682      | 6.48302      | 1.14317      | 0.0500  |
| 9      | 11.506        | BV   | 0.0907      | 28.83651     | 4.11794      | 0.2226  |
| 10     | 11.757        | VV   | 0.1681      | 64.71497     | 4.54664      | 0.4994  |
| 11     | 12.105        | VV   | 0.3068      | 72.90954     | 2.79494      | 0.5627  |
| 12     | 12.954        | VB   | 0.0869      | 28.35678     | 4.83394      | 0.2188  |

Totals : 1.29573e4 1915.34562

### Method B

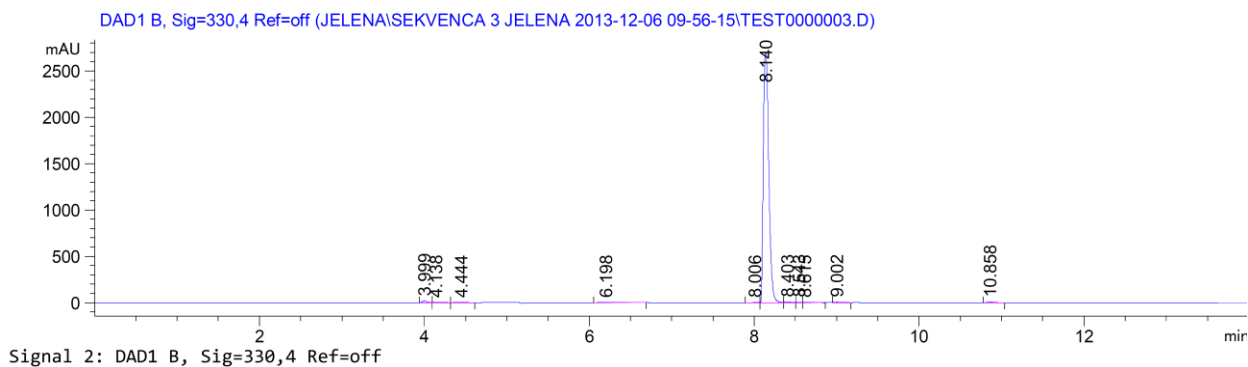

| Peak # | RetTime [min] | Type | Width [min] | Area [mAU*s] | Height [mAU] | Area %  |
|--------|---------------|------|-------------|--------------|--------------|---------|
| 1      | 3.999         | BV   | 0.0671      | 94.15331     | 21.30407     | 0.7341  |
| 2      | 4.138         | VV   | 0.1166      | 43.08921     | 4.46536      | 0.3359  |
| 3      | 4.444         | VB   | 0.1275      | 31.27032     | 2.96527      | 0.2438  |
| 4      | 6.198         | BB   | 0.1530      | 58.01780     | 4.58770      | 0.4523  |
| 5      | 8.006         | BV   | 0.0632      | 27.83480     | 6.21669      | 0.2170  |
| 6      | 8.140         | VV   | 0.0724      | 1.23704e4    | 2704.55054   | 96.4456 |
| 7      | 8.403         | VV   | 0.0893      | 71.28415     | 11.26316     | 0.5558  |
| 8      | 8.543         | VV   | 0.0624      | 30.18333     | 6.91841      | 0.2353  |
| 9      | 8.615         | VB   | 0.0775      | 33.58511     | 5.59406      | 0.2618  |
| 10     | 9.002         | VV   | 0.0662      | 28.54764     | 6.14638      | 0.2226  |
| 11     | 10.858        | BB   | 0.0665      | 37.93799     | 8.85370      | 0.2958  |

Totals : 1.28263e4 2782.86534

## Compound: 9

### Method A

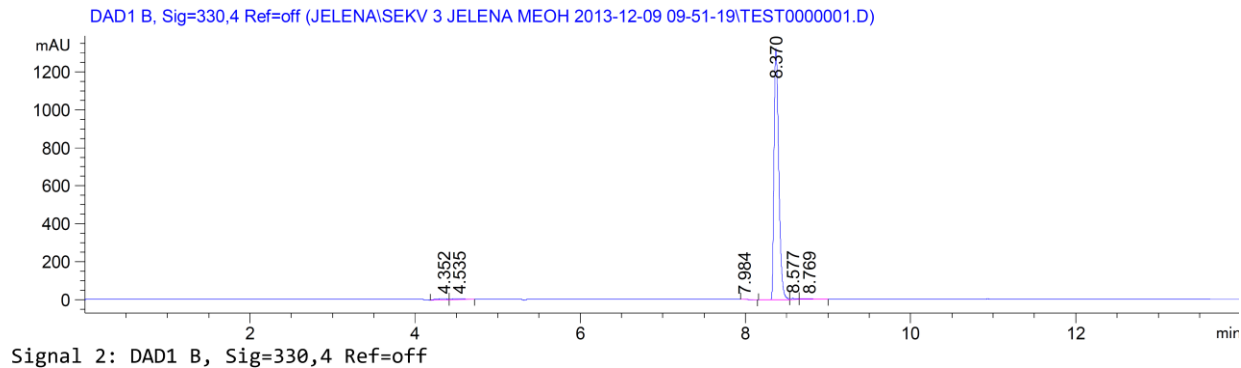

| Peak # | RetTime [min] | Type | Width [min] | Area [mAU*s] | Height [mAU] | Area %  |
|--------|---------------|------|-------------|--------------|--------------|---------|
| 1      | 4.352         | BV   | 0.1243      | 57.48040     | 5.46058      | 1.0512  |
| 2      | 4.535         | VB   | 0.1316      | 52.48553     | 4.72408      | 0.9598  |
| 3      | 7.984         | BB   | 0.0690      | 8.03986      | 1.61602      | 0.1470  |
| 4      | 8.370         | BV   | 0.0616      | 5289.68652   | 1325.03345   | 96.7339 |
| 5      | 8.577         | VV   | 0.0726      | 30.47131     | 5.58997      | 0.5572  |
| 6      | 8.769         | VB   | 0.1543      | 30.12488     | 2.33077      | 0.5509  |

Totals : 5468.28849 1344.75486

### Method B

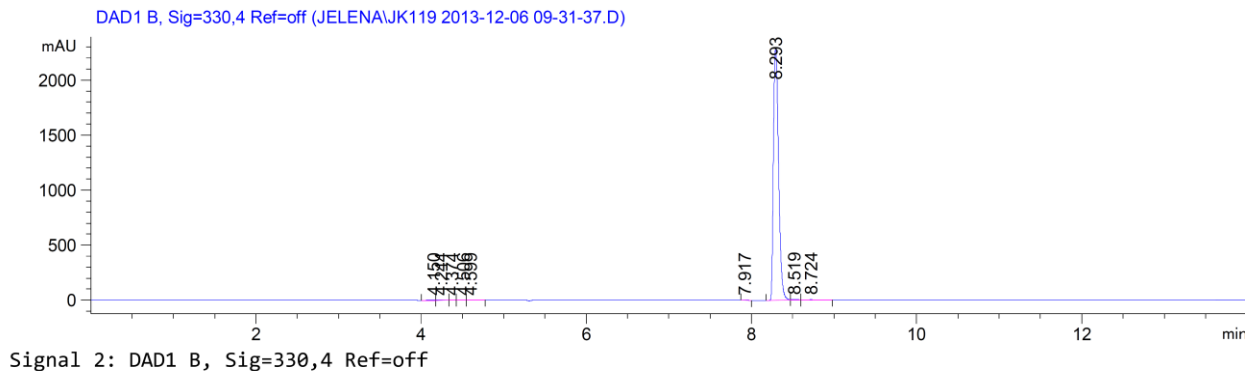

| Peak # | RetTime [min] | Type | Width [min] | Area [mAU*s] | Height [mAU] | Area %  |
|--------|---------------|------|-------------|--------------|--------------|---------|
| 1      | 4.150         | BV   | 0.0873      | 45.32769     | 6.16115      | 0.4460  |
| 2      | 4.244         | VV   | 0.0958      | 43.91695     | 5.61102      | 0.4321  |
| 3      | 4.374         | VB   | 0.0496      | 7.37839      | 2.04480      | 0.0726  |
| 4      | 4.506         | BV   | 0.0527      | 6.91900      | 1.57619      | 0.0681  |
| 5      | 4.599         | VB   | 0.0947      | 14.64486     | 1.99405      | 0.1441  |
| 6      | 7.917         | BB   | 0.0474      | 10.53126     | 3.41979      | 0.1036  |
| 7      | 8.293         | BV   | 0.0683      | 9942.72656   | 2281.36108   | 97.8319 |
| 8      | 8.519         | VV   | 0.0791      | 49.58509     | 9.02305      | 0.4879  |
| 9      | 8.724         | VB   | 0.1409      | 42.04624     | 3.62201      | 0.4137  |

Totals : 1.01631e4 2314.81313



## Compound: 12

### Method A

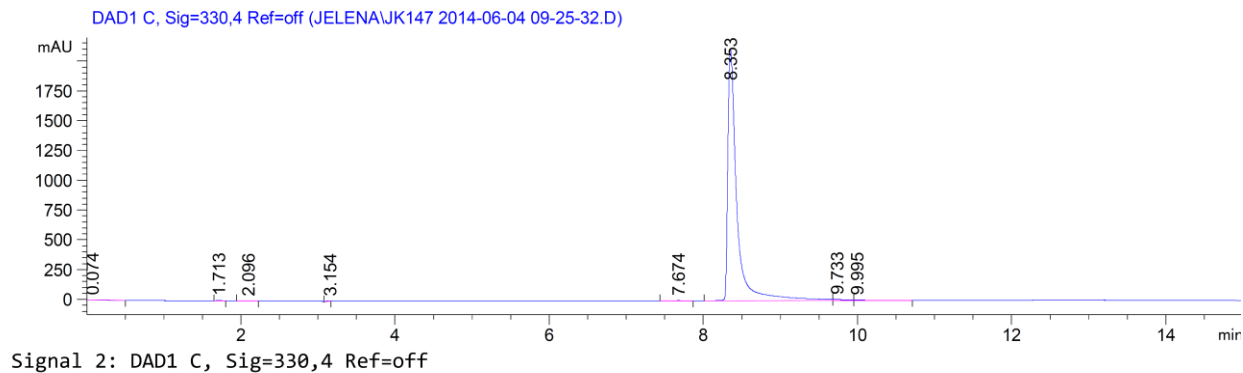

### Method B

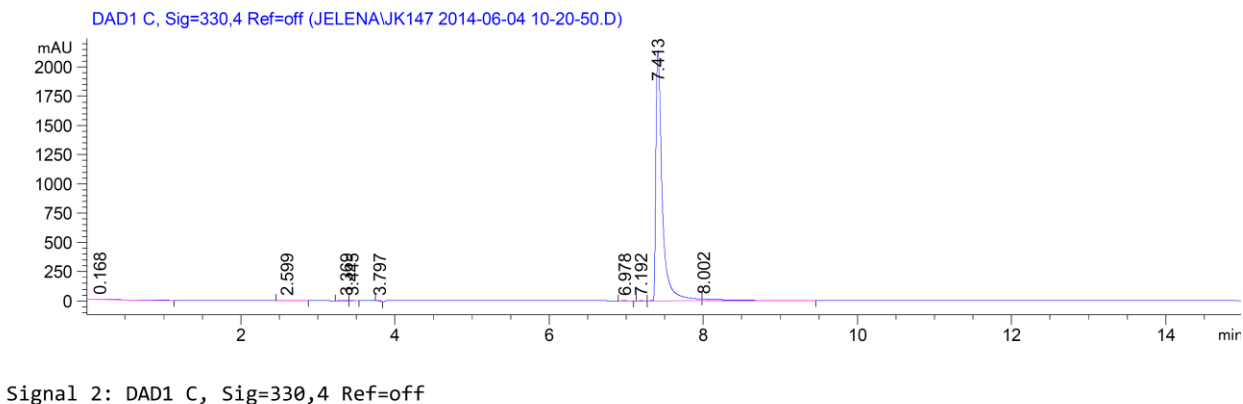

## Compound: 13

### Method A

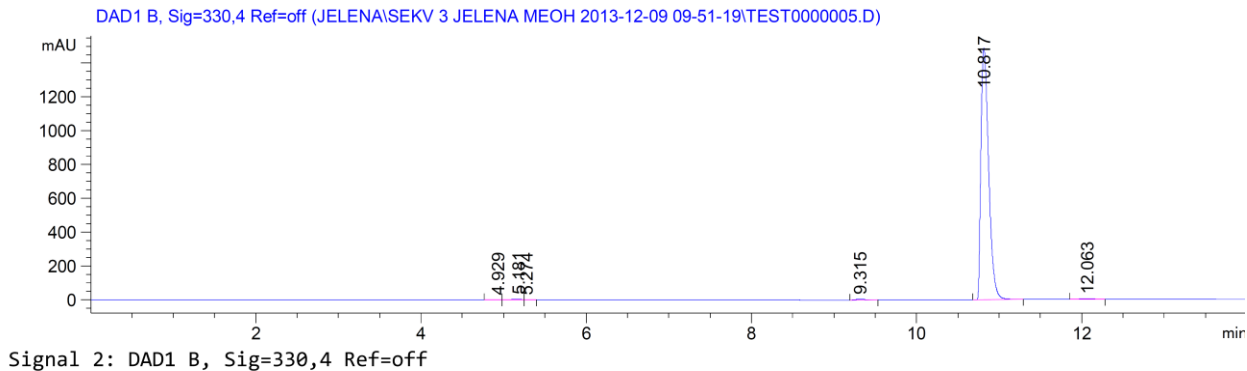

### Method B

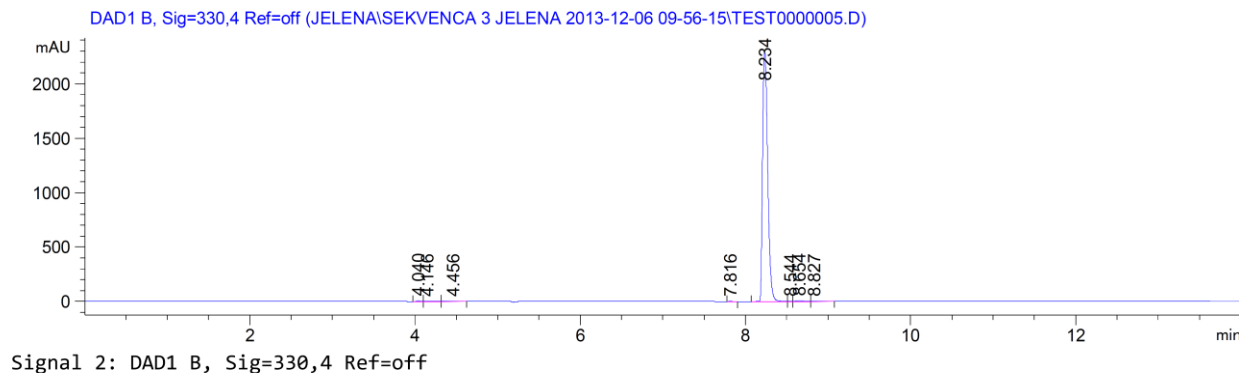

## Compound: 23

### Method A

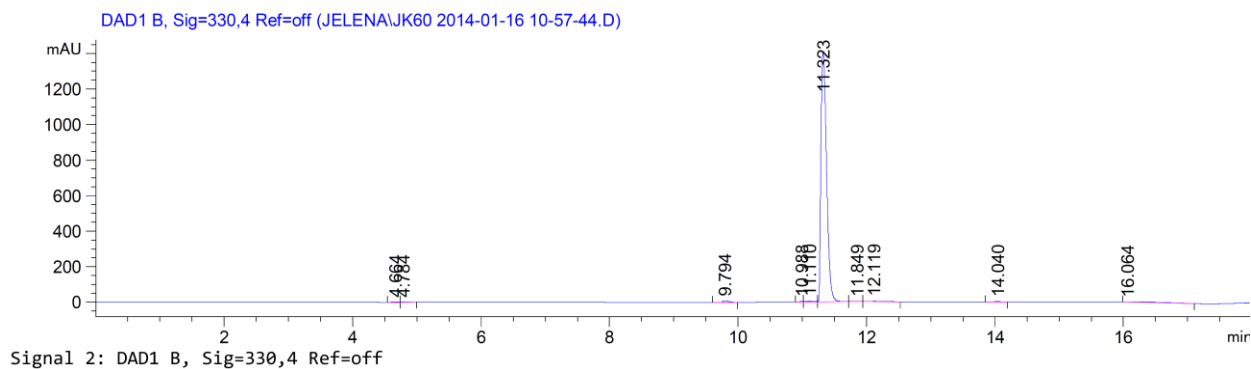

### Method B

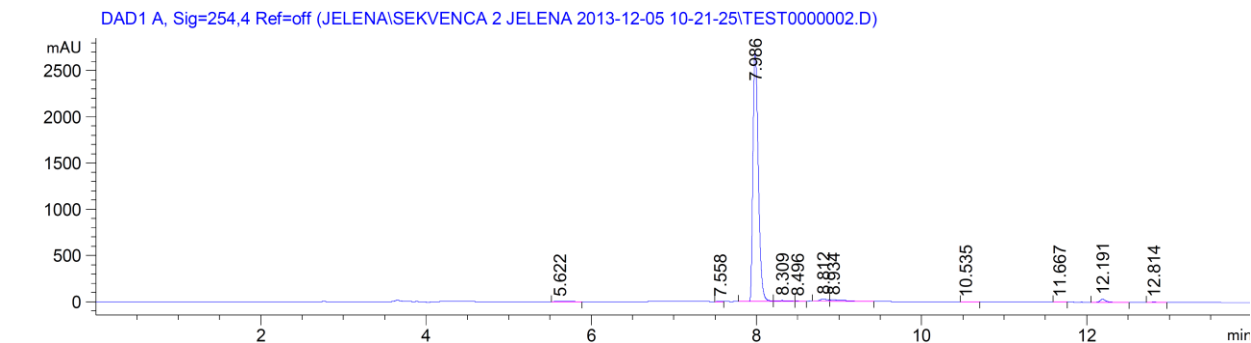

## Compound: 24

### Method A

DAD1 B, Sig=330,4 Ref=off (JELENA\SEKV 7 JELENA MEOH 2014-01-15 13-34-19\TEST0000001.D)

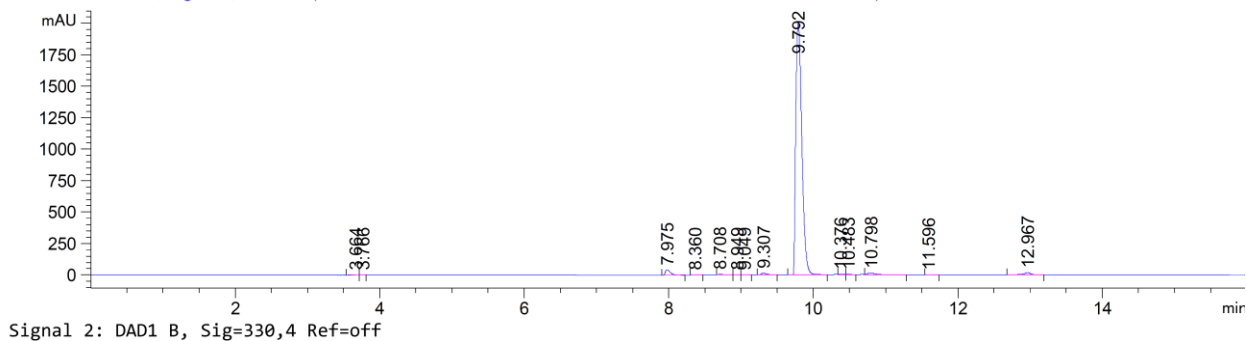

### Method B

DAD1 B, Sig=330,4 Ref=off (JELENA\SEKVENCA 3 JELENA 2013-12-06 09-56-15\TEST0000006.D)

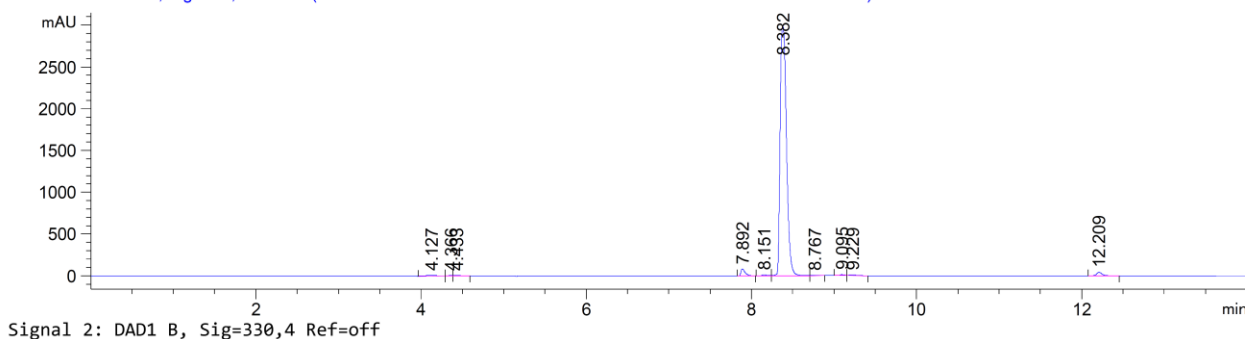

## Compound: 25

### Method A

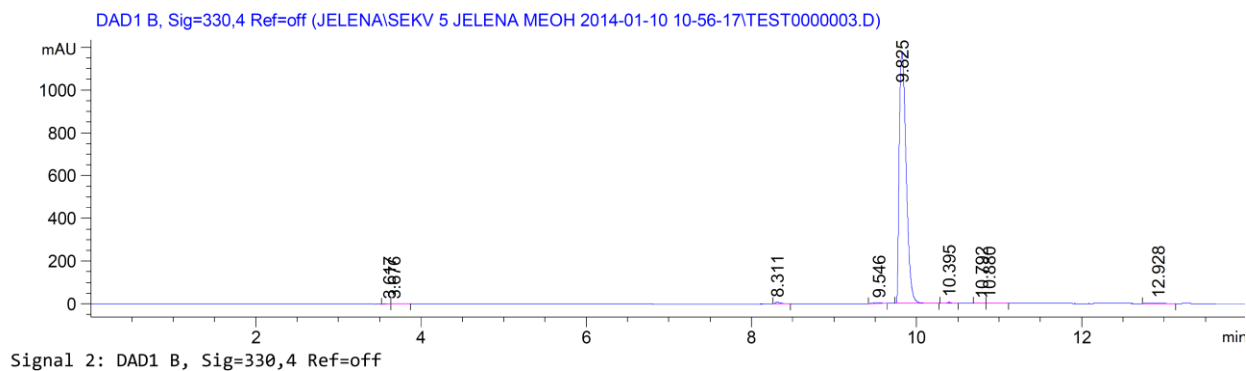

| Peak # | RetTime [min] | Type | Width [min] | Area [mAU*s] | Height [mAU] | Area %  |
|--------|---------------|------|-------------|--------------|--------------|---------|
| 1      | 3.617         | BV   | 0.0505      | 9.37448      | 2.25364      | 0.1340  |
| 2      | 3.676         | VB   | 0.0847      | 14.90127     | 2.23736      | 0.2131  |
| 3      | 8.311         | VB   | 0.0742      | 39.13313     | 8.04708      | 0.5596  |
| 4      | 9.546         | BB   | 0.0928      | 29.24839     | 4.00034      | 0.4182  |
| 5      | 9.825         | BB   | 0.0931      | 6851.14600   | 1174.38684   | 97.9665 |
| 6      | 10.395        | BB   | 0.0227      | 13.68492     | 7.53647      | 0.1957  |
| 7      | 10.792        | VV   | 0.0836      | 9.87055      | 1.40295      | 0.1411  |
| 8      | 10.880        | VB   | 0.0773      | 9.74870      | 1.57217      | 0.1394  |
| 9      | 12.928        | BB   | 0.0831      | 16.24894     | 2.61204      | 0.2323  |

Totals : 6993.35639 1204.04889

### Method B

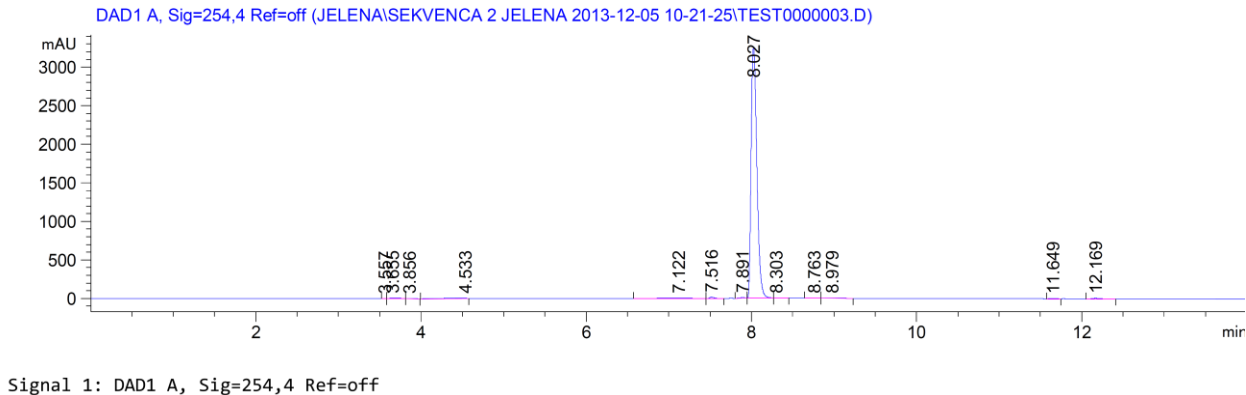

| Peak # | RetTime [min] | Type | Width [min] | Area [mAU*s] | Height [mAU] | Area %  |
|--------|---------------|------|-------------|--------------|--------------|---------|
| 1      | 3.557         | BV   | 0.0368      | 7.45170      | 3.07264      | 0.0453  |
| 2      | 3.655         | VV   | 0.1398      | 77.40693     | 7.00958      | 0.4704  |
| 3      | 3.856         | VB   | 0.0833      | 31.95885     | 5.22805      | 0.1942  |
| 4      | 4.533         | BB   | 0.3180      | 214.98785    | 8.12900      | 1.3066  |
| 5      | 7.122         | BB   | 0.2686      | 92.61446     | 4.06795      | 0.5629  |
| 6      | 7.516         | BB   | 0.0513      | 54.86071     | 16.51079     | 0.3334  |
| 7      | 7.891         | BV   | 0.0584      | 36.18497     | 9.19101      | 0.2199  |
| 8      | 8.027         | VV   | 0.0676      | 1.58162e4    | 3257.52295   | 96.1242 |
| 9      | 8.303         | VB   | 0.0713      | 26.08952     | 5.17310      | 0.1586  |
| 10     | 8.763         | BV   | 0.0728      | 9.52312      | 1.67680      | 0.0579  |
| 11     | 8.979         | VB   | 0.1424      | 40.52629     | 3.51855      | 0.2463  |
| 12     | 11.649        | BV   | 0.0633      | 9.24310      | 2.14548      | 0.0562  |
| 13     | 12.169        | BB   | 0.0674      | 36.87713     | 8.28553      | 0.2241  |

Totals : 1.64539e4 3331.53142

## Compound: 26

### Method A

DAD1 B, Sig=330,4 Ref=off (JELENA\SEKV 3 JELENA MEOH 2013-12-09 09-51-19\TEST0000002.D)

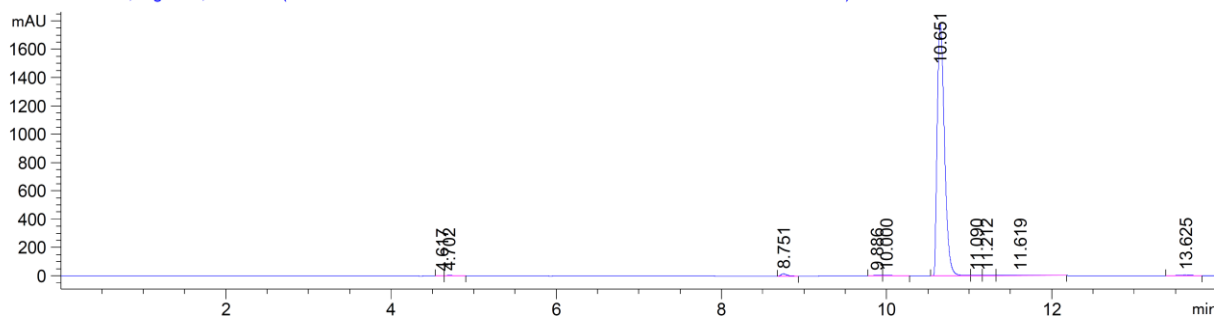

Signal 2: DAD1 B, Sig=330,4 Ref=off

| Peak # | RetTime [min] | Type | Width [min] | Area [mAU*s] | Height [mAU] | Area %  |
|--------|---------------|------|-------------|--------------|--------------|---------|
| 1      | 4.617         | BV   | 0.0554      | 7.51402      | 1.87047      | 0.0675  |
| 2      | 4.702         | VB   | 0.0986      | 21.65252     | 2.60144      | 0.1946  |
| 3      | 8.751         | BB   | 0.0759      | 79.05142     | 15.65897     | 0.7105  |
| 4      | 9.886         | BV   | 0.0829      | 29.91393     | 5.21826      | 0.2689  |
| 5      | 10.000        | VB   | 0.0964      | 30.30073     | 4.18722      | 0.2723  |
| 6      | 10.651        | BV   | 0.0972      | 1.08238e4    | 1774.77820   | 97.2785 |
| 7      | 11.090        | VV   | 0.0813      | 17.35509     | 2.58638      | 0.1560  |
| 8      | 11.212        | VV   | 0.0998      | 16.42139     | 1.95930      | 0.1476  |
| 9      | 11.619        | VB   | 0.2318      | 64.19098     | 3.25205      | 0.5769  |
| 10     | 13.625        | BB   | 0.0865      | 36.40666     | 5.98266      | 0.3272  |

Totals : 1.11266e4 1818.09495

### Method B

DAD1 B, Sig=330,4 Ref=off (JELENA\SEKVENCA 3 JELENA 2013-12-06 09-56-15\TEST0000002.D)

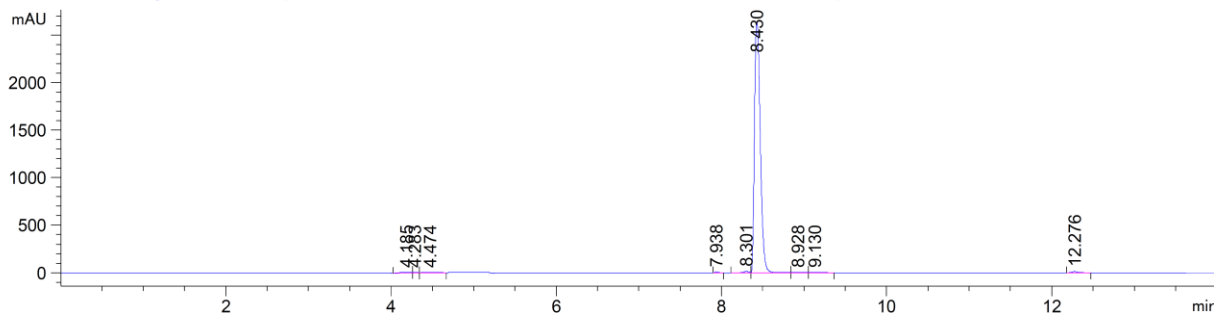

Signal 2: DAD1 B, Sig=330,4 Ref=off

| Peak # | RetTime [min] | Type | Width [min] | Area [mAU*s] | Height [mAU] | Area %  |
|--------|---------------|------|-------------|--------------|--------------|---------|
| 1      | 4.185         | BV   | 0.1262      | 72.88445     | 6.92958      | 0.5492  |
| 2      | 4.283         | VV   | 0.0562      | 23.05473     | 5.05257      | 0.1737  |
| 3      | 4.474         | VB   | 0.1468      | 55.43713     | 4.48294      | 0.4177  |
| 4      | 7.938         | BV   | 0.0474      | 39.08035     | 12.89380     | 0.2945  |
| 5      | 8.301         | BV   | 0.0724      | 81.92766     | 16.95385     | 0.6173  |
| 6      | 8.430         | VV   | 0.0770      | 1.28938e4    | 2638.54663   | 97.1565 |
| 7      | 8.928         | VV   | 0.1118      | 24.42923     | 2.61844      | 0.1841  |
| 8      | 9.130         | VB   | 0.0905      | 25.61717     | 3.66795      | 0.1930  |
| 9      | 12.276        | BB   | 0.0679      | 54.92933     | 12.23009     | 0.4139  |

Totals : 1.32711e4 2703.37585

## Compound: 27

### Method A

DAD1 C, Sig=330,4 Ref=off (JELENA\JK149 2014-07-21 16-44-33.D)

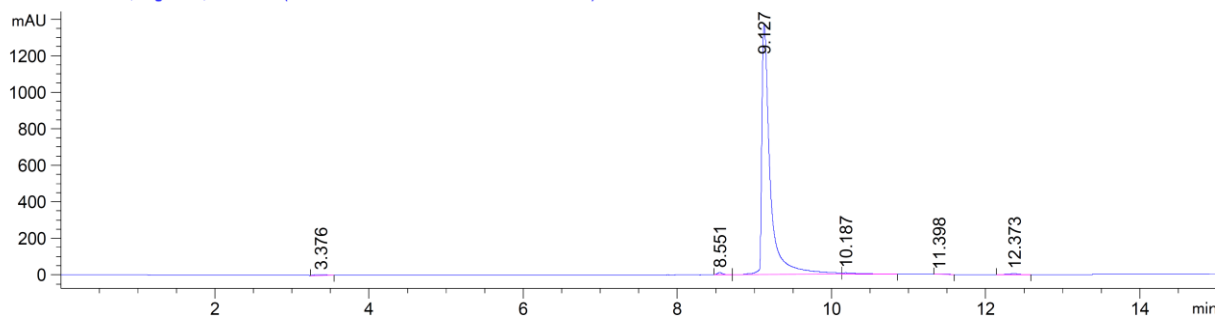

Signal 2: DAD1 C, Sig=330,4 Ref=off

| Peak # | RetTime [min] | Type | Width [min] | Area [mAU*s] | Height [mAU] | Area %  |
|--------|---------------|------|-------------|--------------|--------------|---------|
| 1      | 3.376         | BB   | 0.1286      | 37.46206     | 3.46634      | 0.3481  |
| 2      | 8.551         | VB   | 0.0662      | 58.72265     | 12.74624     | 0.5457  |
| 3      | 9.127         | BV   | 0.1110      | 1.04794e4    | 1373.59509   | 97.3772 |
| 4      | 10.187        | VB   | 0.2017      | 143.71709    | 8.41833      | 1.3355  |
| 5      | 11.398        | BB   | 0.0582      | 5.11887      | 1.07167      | 0.0476  |
| 6      | 12.373        | BB   | 0.0892      | 37.23857     | 5.66381      | 0.3460  |

Totals : 1.07616e4 1404.96148

### Method B

DAD1 C, Sig=330,4 Ref=off (JELENA\JK149 2014-07-21 17-19-34.D)

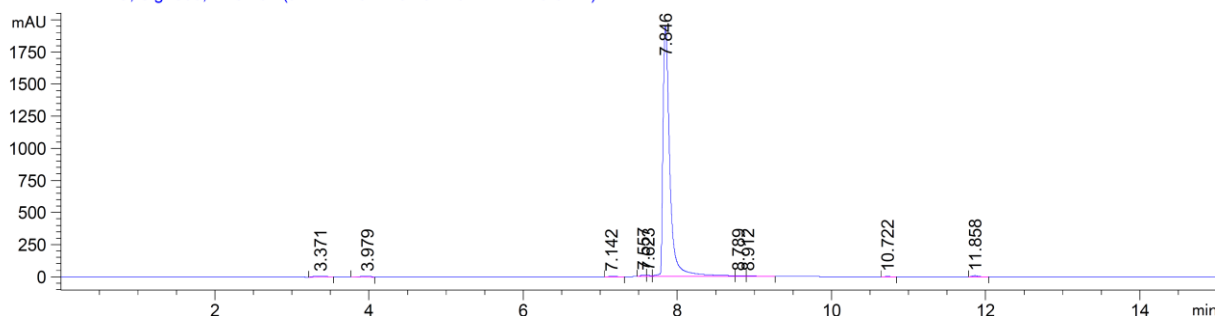

Signal 2: DAD1 C, Sig=330,4 Ref=off

| Peak # | RetTime [min] | Type | Width [min] | Area [mAU*s] | Height [mAU] | Area %  |
|--------|---------------|------|-------------|--------------|--------------|---------|
| 1      | 3.371         | BB   | 0.1493      | 54.54555     | 4.33396      | 0.4380  |
| 2      | 3.979         | BB   | 0.1362      | 43.53336     | 3.76921      | 0.3496  |
| 3      | 7.142         | BB   | 0.0835      | 33.94343     | 5.61969      | 0.2726  |
| 4      | 7.557         | BV   | 0.0688      | 53.47674     | 12.15959     | 0.4294  |
| 5      | 7.623         | VV   | 0.0534      | 34.94339     | 8.98462      | 0.2806  |
| 6      | 7.846         | VV   | 0.0937      | 1.21029e4    | 1956.65942   | 97.1804 |
| 7      | 8.789         | VV   | 0.0937      | 44.77769     | 6.28099      | 0.3595  |
| 8      | 8.912         | VB   | 0.1204      | 41.32400     | 4.14327      | 0.3318  |
| 9      | 10.722        | BB   | 0.0551      | 5.33902      | 1.28228      | 0.0429  |
| 10     | 11.858        | VB   | 0.0663      | 39.26548     | 8.93423      | 0.3153  |

Totals : 1.24540e4 2012.16725

## Compound: 28

### Method A

DAD1 C, Sig=330,4 Ref=off (JELENA\KB11 2014-05-14 16-33-57.D)

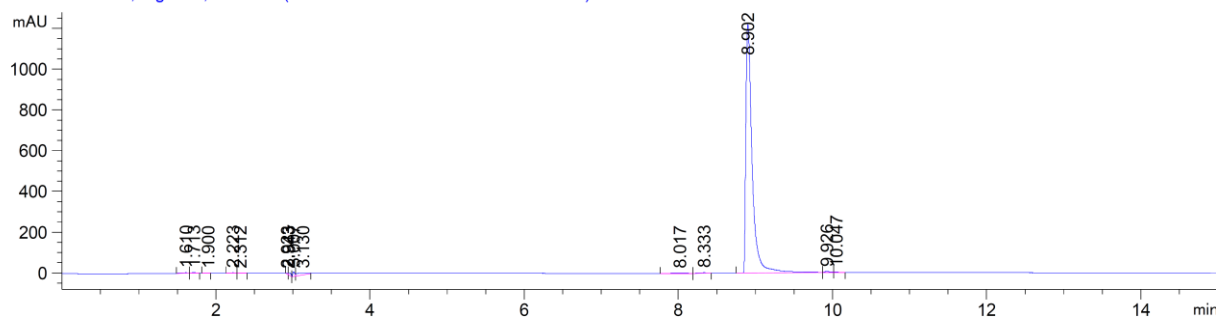

Signal 2: DAD1 C, Sig=330,4 Ref=off

| Peak # | RetTime [min] | Type | Width [min] | Area [mAU*s] | Height [mAU] | Area %  |
|--------|---------------|------|-------------|--------------|--------------|---------|
| 1      | 1.610         | BB   | 0.0779      | 15.70328     | 2.58483      | 0.2156  |
| 2      | 1.713         | BV   | 0.0513      | 12.59033     | 3.04276      | 0.1729  |
| 3      | 1.900         | VV   | 0.0643      | 9.27365      | 1.76377      | 0.1274  |
| 4      | 2.223         | VV   | 0.0677      | 10.39338     | 1.99806      | 0.1427  |
| 5      | 2.312         | VV   | 0.0659      | 6.52515      | 1.27125      | 0.0896  |
| 6      | 2.923         | BV   | 0.0229      | 5.54642      | 3.41748      | 0.0762  |
| 7      | 2.943         | VB   | 0.0422      | 26.24262     | 7.53159      | 0.3604  |
| 8      | 3.007         | BV   | 0.0277      | 38.72638     | 21.87623     | 0.5318  |
| 9      | 3.130         | VV   | 0.1229      | 91.16618     | 8.79532      | 1.2520  |
| 10     | 8.017         | VB   | 0.1427      | 16.69414     | 1.37970      | 0.2293  |
| 11     | 8.333         | BB   | 0.0752      | 16.95468     | 2.87798      | 0.2328  |
| 12     | 8.902         | BV   | 0.0855      | 6996.87158   | 1219.09692   | 96.0861 |
| 13     | 9.926         | VV   | 0.0699      | 27.38257     | 5.37854      | 0.3760  |
| 14     | 10.047        | VV   | 0.0694      | 7.80772      | 1.44832      | 0.1072  |

Totals : 7281.87809 1282.46276

### Method B

DAD1 B, Sig=254,4 Ref=off (JELENA\KB11 2014-05-16 13-31-27.D)

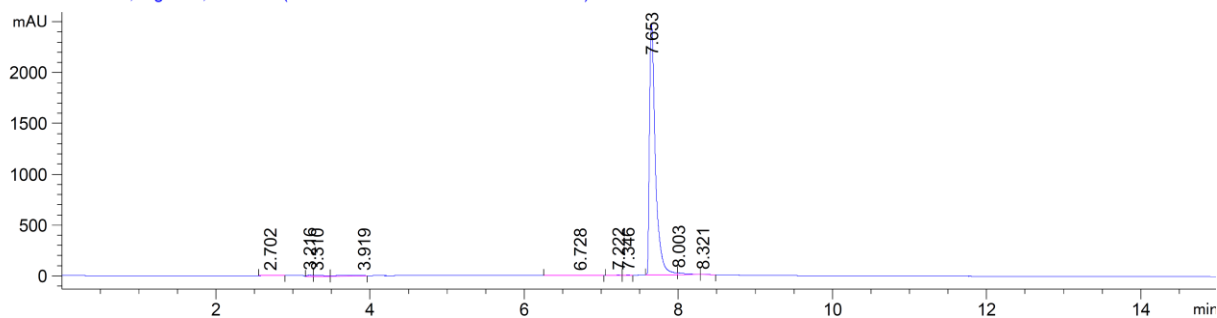

Signal 1: DAD1 B, Sig=254,4 Ref=off

| Peak # | RetTime [min] | Type | Width [min] | Area [mAU*s] | Height [mAU] | Area %  |
|--------|---------------|------|-------------|--------------|--------------|---------|
| 1      | 2.702         | BB   | 0.1061      | 9.49930      | 1.05988      | 0.0688  |
| 2      | 3.216         | BV   | 0.0634      | 49.92383     | 12.14818     | 0.3614  |
| 3      | 3.310         | VV   | 0.1107      | 77.92776     | 8.47815      | 0.5642  |
| 4      | 3.919         | VB   | 0.2681      | 172.10172    | 7.76571      | 1.2460  |
| 5      | 6.728         | BB   | 0.2594      | 59.97980     | 2.72341      | 0.4342  |
| 6      | 7.222         | BV   | 0.0990      | 23.79228     | 3.05056      | 0.1722  |
| 7      | 7.346         | VB   | 0.0686      | 10.72035     | 1.96540      | 0.0776  |
| 8      | 7.653         | BV   | 0.0813      | 1.32674e4    | 2464.38770   | 96.0514 |
| 9      | 8.003         | VB   | 0.1029      | 128.24153    | 16.54515     | 0.9284  |
| 10     | 8.321         | BB   | 0.0638      | 13.22463     | 2.89726      | 0.0957  |

Totals : 1.38128e4 2521.02139



# Compound: 29

## Method A

DAD1 B, Sig=330,4 Ref=off (JELENA\KB09 2014-05-06 15-21-55.D)

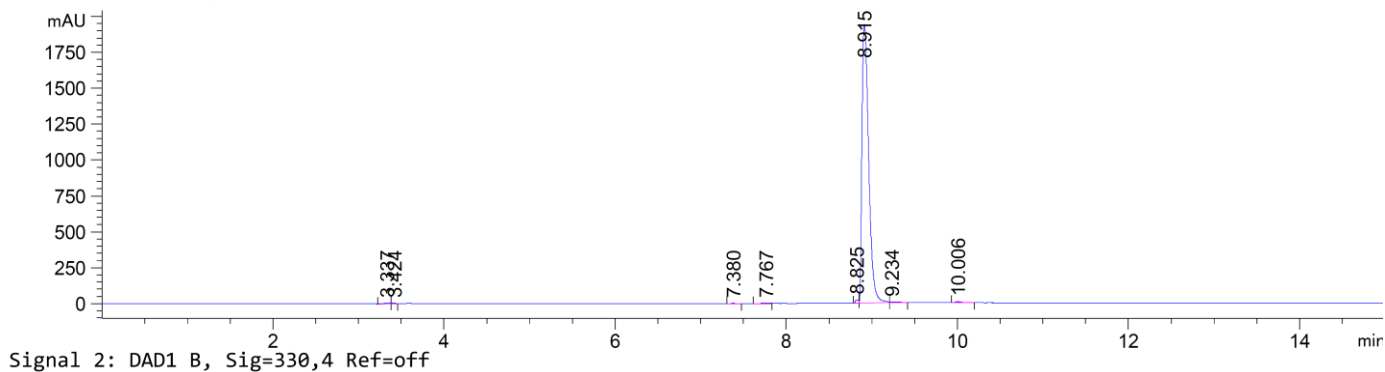

| Peak # | RetTime [min] | Type | Width [min] | Area [mAU*s] | Height [mAU] | Area %  |
|--------|---------------|------|-------------|--------------|--------------|---------|
| 1      | 3.337         | BV   | 0.0872      | 25.04193     | 3.62127      | 0.2336  |
| 2      | 3.424         | VB   | 0.0548      | 5.00681      | 1.12849      | 0.0467  |
| 3      | 7.380         | BB   | 0.0482      | 5.18607      | 1.32440      | 0.0484  |
| 4      | 7.767         | BV   | 0.0729      | 10.99308     | 1.82142      | 0.1026  |
| 5      | 8.825         | BV   | 0.0401      | 59.87083     | 23.63365     | 0.5586  |
| 6      | 8.915         | VV   | 0.0853      | 1.05243e4    | 1941.10217   | 98.1950 |
| 7      | 9.234         | VB   | 0.0827      | 45.85837     | 6.83856      | 0.4279  |
| 8      | 10.006        | VB   | 0.0749      | 41.49577     | 8.01592      | 0.3872  |

Totals : 1.07178e4 1987.48589

## Method B

DAD1 B, Sig=254,4 Ref=off (JELENA\KB09 2014-05-16 12-52-58.D)

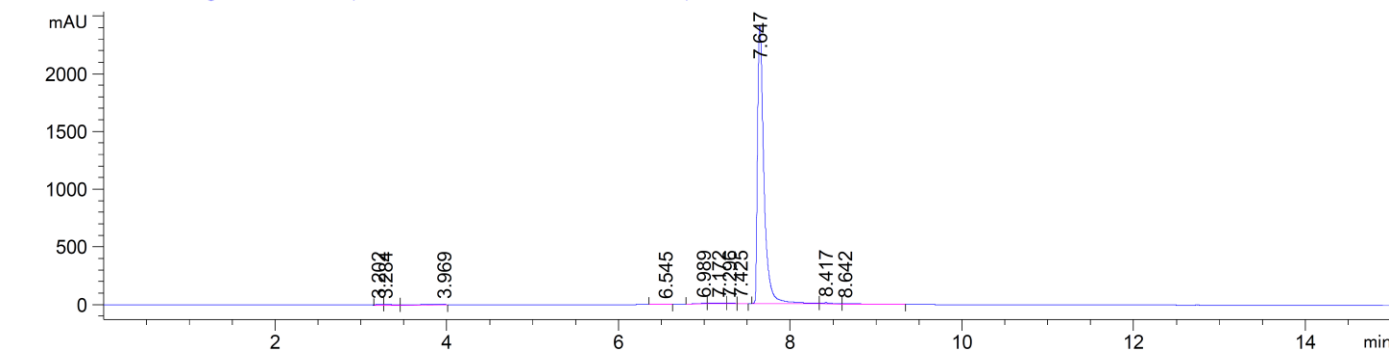

Signal 1: DAD1 B, Sig=254,4 Ref=off

| Peak # | RetTime [min] | Type | Width [min] | Area [mAU*s] | Height [mAU] | Area %  |
|--------|---------------|------|-------------|--------------|--------------|---------|
| 1      | 3.202         | BV   | 0.0764      | 52.98580     | 10.40431     | 0.4002  |
| 2      | 3.284         | VV   | 0.0877      | 55.00214     | 7.53007      | 0.4154  |
| 3      | 3.969         | VB   | 0.2957      | 170.33707    | 6.94471      | 1.2864  |
| 4      | 6.545         | BB   | 0.0887      | 11.36586     | 1.54739      | 0.0858  |
| 5      | 6.989         | BV   | 0.0933      | 48.44630     | 6.94798      | 0.3659  |
| 6      | 7.172         | VV   | 0.1366      | 101.32356    | 9.08473      | 0.7652  |
| 7      | 7.296         | VV   | 0.0696      | 33.77491     | 6.14939      | 0.2551  |
| 8      | 7.425         | VB   | 0.0690      | 13.18127     | 2.36600      | 0.0995  |
| 9      | 7.647         | BV   | 0.0795      | 1.25998e4    | 2410.41748   | 95.1541 |
| 10     | 8.417         | VV   | 0.1227      | 99.51318     | 10.87686     | 0.7515  |
| 11     | 8.642         | VB   | 0.1922      | 55.73877     | 3.40944      | 0.4209  |

Totals : 1.32414e4 2475.67835

## Compound: 30

### Method A

DAD1 C, Sig=330,4 Ref=off (JELENA\KB10 2014-05-14 15-58-23.D)

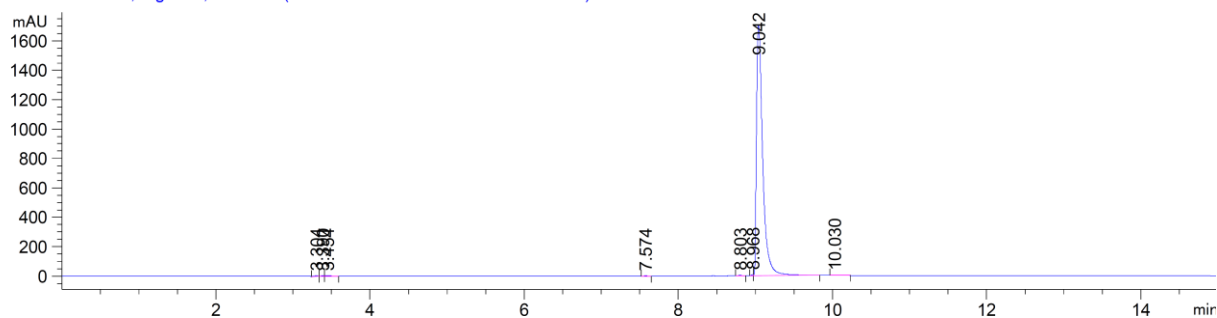

Signal 2: DAD1 C, Sig=330,4 Ref=off

| Peak # | RetTime [min] | Type | Width [min] | Area [mAU*s] | Height [mAU] | Area %  |
|--------|---------------|------|-------------|--------------|--------------|---------|
| 1      | 3.304         | BV   | 0.0493      | 16.06239     | 4.23136      | 0.1669  |
| 2      | 3.390         | VV   | 0.0467      | 11.89283     | 3.13706      | 0.1236  |
| 3      | 3.454         | VB   | 0.0773      | 18.19798     | 2.84010      | 0.1891  |
| 4      | 7.574         | BV   | 0.0485      | 7.66518      | 2.35465      | 0.0796  |
| 5      | 8.803         | BV   | 0.0545      | 13.79927     | 3.88356      | 0.1434  |
| 6      | 8.968         | BV   | 0.0280      | 11.70945     | 6.65575      | 0.1217  |
| 7      | 9.042         | VV   | 0.0842      | 9537.06250   | 1706.78528   | 99.0906 |
| 8      | 10.030        | BB   | 0.0879      | 8.19428      | 1.11260      | 0.0851  |

Totals : 9624.58387 1731.00036

### Method B

DAD1 B, Sig=254,4 Ref=off (JELENA\KB10 2014-05-16 13-13-48.D)

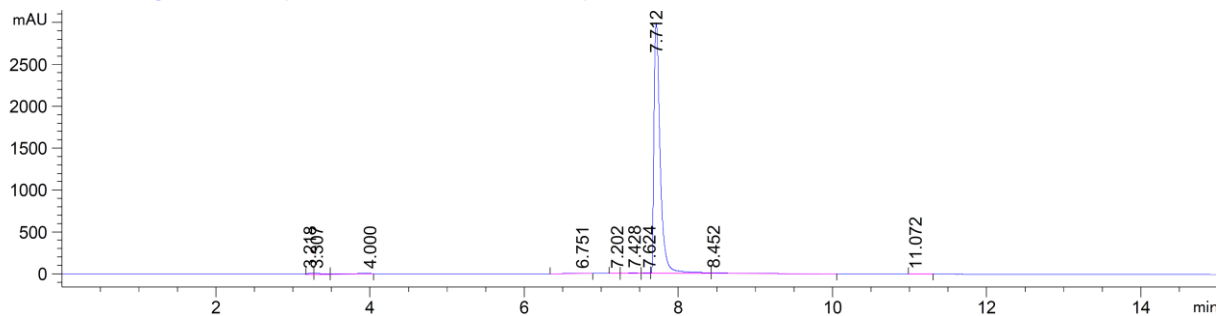

Signal 1: DAD1 B, Sig=254,4 Ref=off

| Peak # | RetTime [min] | Type | Width [min] | Area [mAU*s] | Height [mAU] | Area %  |
|--------|---------------|------|-------------|--------------|--------------|---------|
| 1      | 3.218         | BV   | 0.0672      | 52.70157     | 11.89874     | 0.3043  |
| 2      | 3.307         | VV   | 0.0993      | 67.16257     | 8.21857      | 0.3879  |
| 3      | 4.000         | VB   | 0.3056      | 162.46524    | 6.37006      | 0.9382  |
| 4      | 6.751         | BV   | 0.2007      | 23.72937     | 1.38993      | 0.1370  |
| 5      | 7.202         | BV   | 0.0586      | 6.79644      | 1.42566      | 0.0392  |
| 6      | 7.428         | VB   | 0.1261      | 28.87228     | 2.75825      | 0.1667  |
| 7      | 7.624         | BV   | 0.0659      | 21.37490     | 4.42103      | 0.1234  |
| 8      | 7.712         | VV   | 0.0848      | 1.67501e4    | 2992.34570   | 96.7285 |
| 9      | 8.452         | VB   | 0.2838      | 192.19623    | 8.02754      | 1.1099  |
| 10     | 11.072        | BV   | 0.0648      | 11.21800     | 2.41173      | 0.0648  |

Totals : 1.73166e4 3039.26721

# Compound: 31

## Method A

DAD1 C, Sig=330,4 Ref=off (JELENA\KB18 2014-12-19 11-59-28.D)

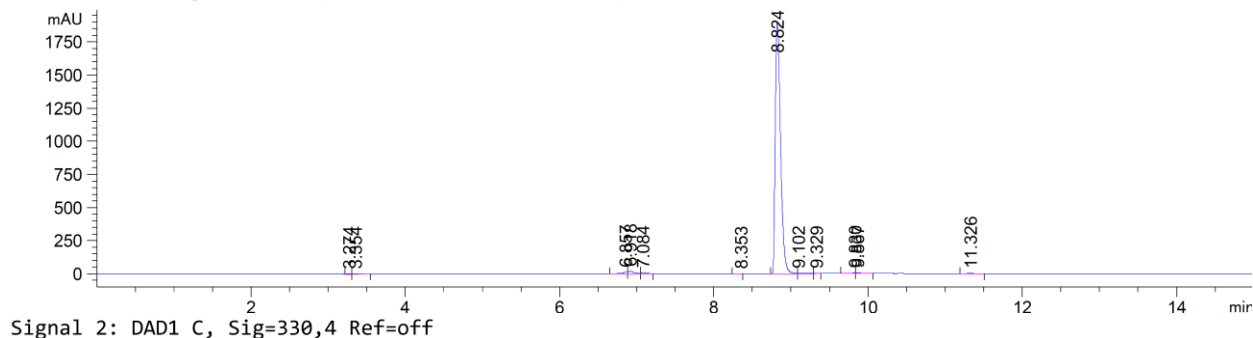

| Peak # | RetTime [min] | Type | Width [min] | Area [mAU*s] | Height [mAU] | Area %  |
|--------|---------------|------|-------------|--------------|--------------|---------|
| 1      | 3.274         | BV   | 0.0493      | 10.80486     | 2.91279      | 0.1149  |
| 2      | 3.354         | VB   | 0.0990      | 24.59103     | 2.94322      | 0.2615  |
| 3      | 6.857         | BV   | 0.0663      | 60.44729     | 12.41429     | 0.6428  |
| 4      | 6.918         | VV   | 0.0740      | 97.95042     | 18.87545     | 1.0416  |
| 5      | 7.084         | VB   | 0.0541      | 30.88347     | 8.35320      | 0.3284  |
| 6      | 8.353         | BV   | 0.0611      | 5.07837      | 1.01095      | 0.0540  |
| 7      | 8.824         | BV   | 0.0744      | 9083.40430   | 1897.02832   | 96.5961 |
| 8      | 9.102         | VV   | 0.0853      | 18.90624     | 2.69666      | 0.2011  |
| 9      | 9.329         | VV   | 0.0601      | 5.40396      | 1.09434      | 0.0575  |
| 10     | 9.830         | BV   | 0.0487      | 21.79220     | 6.03165      | 0.2317  |
| 11     | 9.867         | VB   | 0.0637      | 30.03695     | 6.71436      | 0.3194  |
| 12     | 11.326        | BB   | 0.0685      | 14.19316     | 2.73837      | 0.1509  |

Totals : 9403.49227 1962.81359

## Method B

DAD1 C, Sig=330,4 Ref=off (JELENA\KB18 2014-12-19 13-30-42.D)

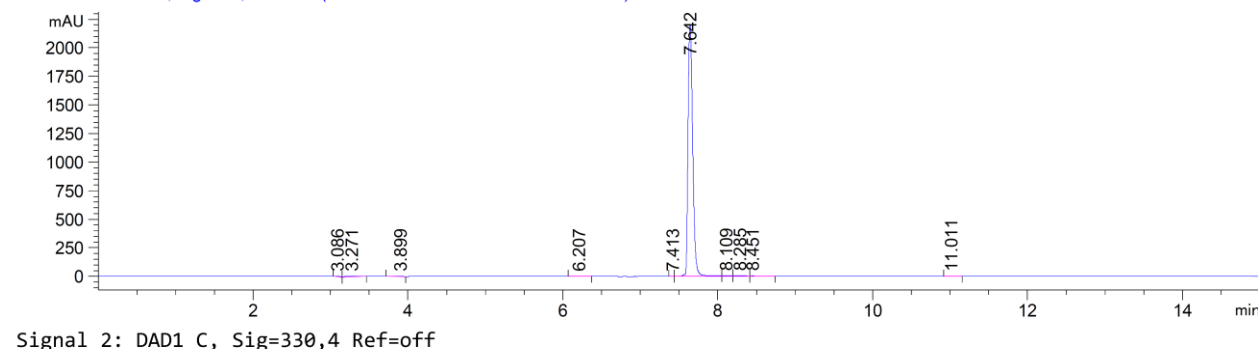

| Peak # | RetTime [min] | Type | Width [min] | Area [mAU*s] | Height [mAU] | Area %  |
|--------|---------------|------|-------------|--------------|--------------|---------|
| 1      | 3.086         | BB   | 0.0644      | 15.37207     | 2.87526      | 0.1604  |
| 2      | 3.271         | BB   | 0.1461      | 71.78635     | 5.91384      | 0.7489  |
| 3      | 3.899         | BB   | 0.1071      | 35.31371     | 3.90318      | 0.3684  |
| 4      | 6.207         | BB   | 0.0936      | 11.34405     | 1.45344      | 0.1183  |
| 5      | 7.413         | BV   | 0.0405      | 5.69019      | 2.01068      | 0.0594  |
| 6      | 7.642         | VV   | 0.0663      | 9308.26074   | 2204.40454   | 97.1037 |
| 7      | 8.109         | VV   | 0.0847      | 43.05571     | 7.00236      | 0.4492  |
| 8      | 8.285         | VV   | 0.1146      | 58.04589     | 6.35468      | 0.6055  |
| 9      | 8.451         | VB   | 0.0865      | 22.64468     | 3.36756      | 0.2362  |
| 10     | 11.011        | VV   | 0.0601      | 14.38130     | 3.56447      | 0.1500  |

Totals : 9585.89468 2240.85000

## Compound: 32

### Method A

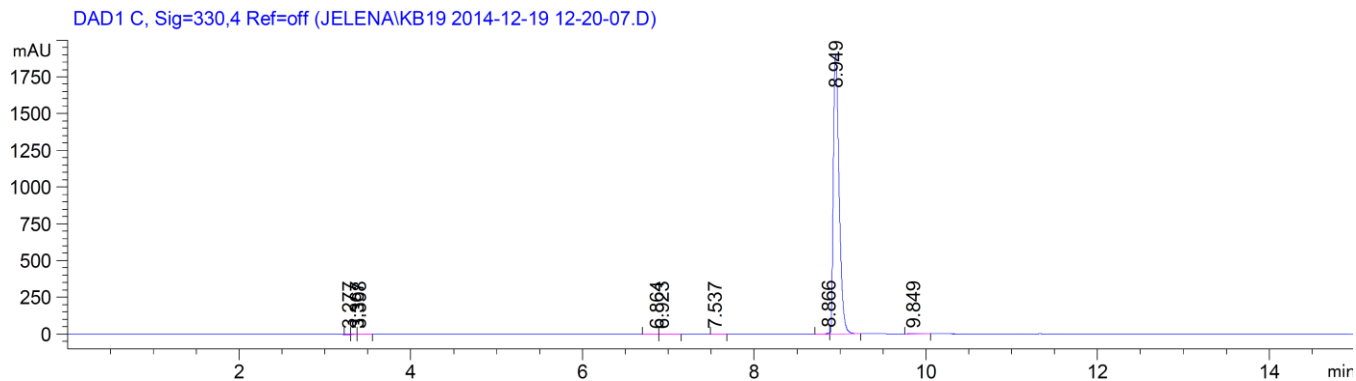

Signal 2: DAD1 C, Sig=330,4 Ref=off

| Peak # | RetTime [min] | Type | Width [min] | Area [mAU*s] | Height [mAU] | Area %  |
|--------|---------------|------|-------------|--------------|--------------|---------|
| 1      | 3.277         | BV   | 0.0440      | 11.43471     | 3.17432      | 0.1267  |
| 2      | 3.367         | VV   | 0.0518      | 11.68167     | 2.71204      | 0.1294  |
| 3      | 3.398         | VB   | 0.0707      | 14.61853     | 2.46387      | 0.1619  |
| 4      | 6.864         | BV   | 0.0727      | 9.55289      | 1.58673      | 0.1058  |
| 5      | 6.923         | VV   | 0.0863      | 12.87940     | 1.95542      | 0.1427  |
| 6      | 7.537         | BB   | 0.0501      | 8.28078      | 2.40734      | 0.0917  |
| 7      | 8.866         | BV   | 0.0401      | 17.60524     | 7.04945      | 0.1950  |
| 8      | 8.949         | VV   | 0.0727      | 8931.37207   | 1904.48181   | 98.9348 |
| 9      | 9.849         | BB   | 0.0682      | 10.10827     | 1.92651      | 0.1120  |

Totals : 9027.53357 1927.75751

### Method B

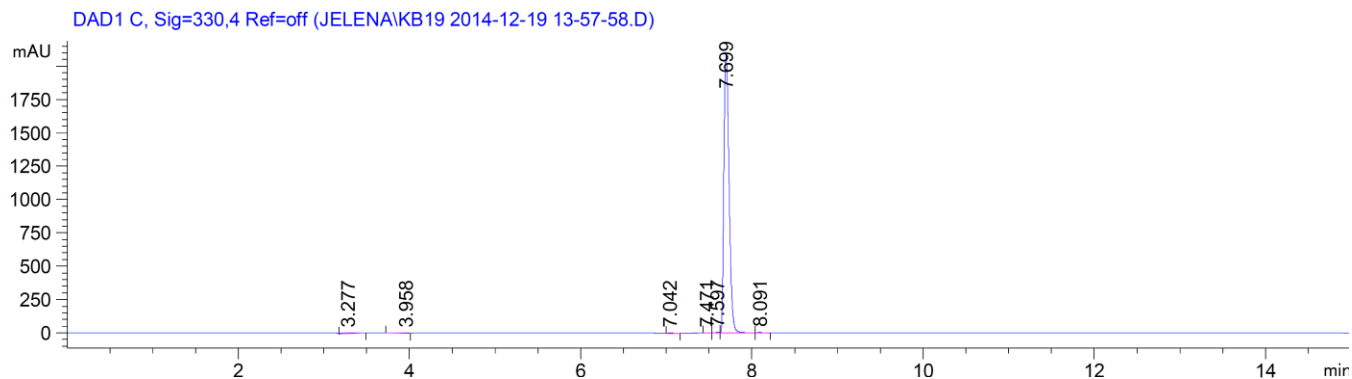

Signal 2: DAD1 C, Sig=330,4 Ref=off

| Peak # | RetTime [min] | Type | Width [min] | Area [mAU*s] | Height [mAU] | Area %  |
|--------|---------------|------|-------------|--------------|--------------|---------|
| 1      | 3.277         | BB   | 0.1383      | 77.06673     | 6.57384      | 0.8579  |
| 2      | 3.958         | VB   | 0.1217      | 37.16552     | 3.65288      | 0.4137  |
| 3      | 7.042         | BB   | 0.0436      | 7.98812      | 2.69098      | 0.0889  |
| 4      | 7.471         | VB   | 0.0455      | 5.80909      | 1.90782      | 0.0647  |
| 5      | 7.597         | BV   | 0.0583      | 14.32890     | 3.57426      | 0.1595  |
| 6      | 7.699         | VV   | 0.0669      | 8829.40625   | 2084.87109   | 98.2832 |
| 7      | 8.091         | VB   | 0.0631      | 11.87412     | 2.53636      | 0.1322  |

Totals : 8983.63873 2105.80724

Compound: 37

## Method E

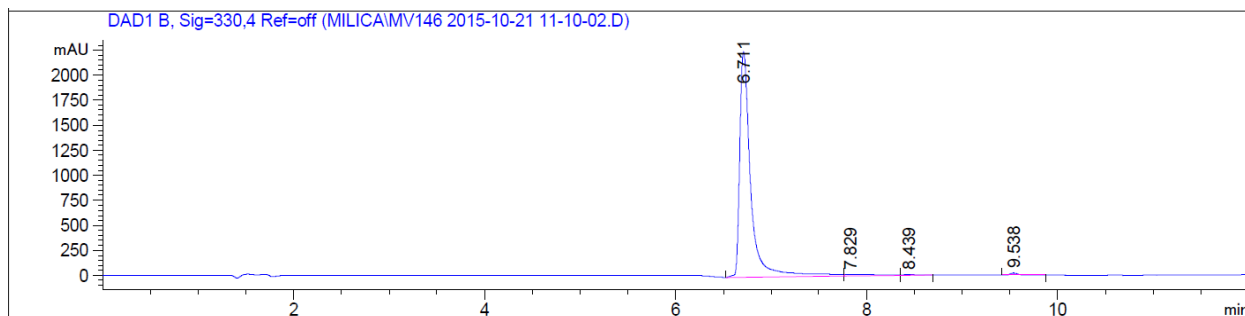

| Peak # | RetTime [min] | Type | Width [min] | Area [mAU*s] | Height [mAU] | Area %  |
|--------|---------------|------|-------------|--------------|--------------|---------|
| 1      | 6.711         | BV   | 0.1195      | 1.82389e4    | 2252.57471   | 96.6559 |
| 2      | 7.829         | VV   | 0.2625      | 397.60565    | 17.98081     | 2.1071  |
| 3      | 8.439         | VB   | 0.1208      | 99.11401     | 11.24984     | 0.5252  |
| 4      | 9.538         | BB   | 0.0940      | 134.30275    | 20.89571     | 0.7117  |

Totals : 1.88699e4 2302.70107

## Method F

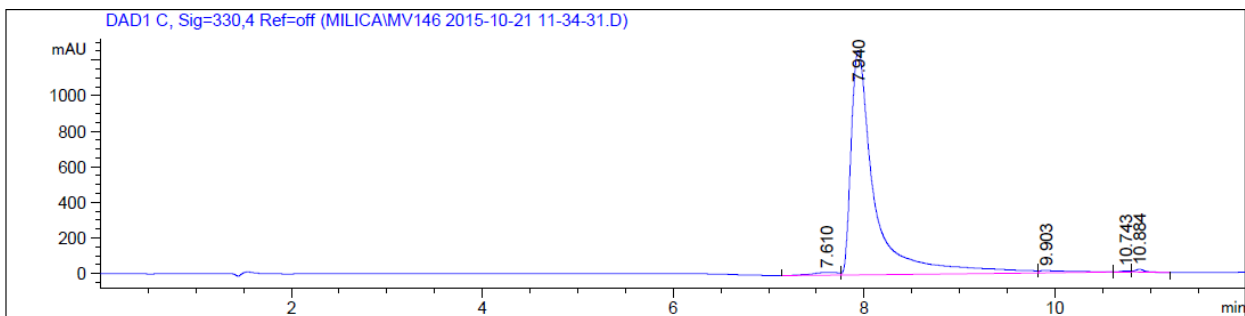

| Peak # | RetTime [min] | Type | Width [min] | Area [mAU*s] | Height [mAU] | Area %  |
|--------|---------------|------|-------------|--------------|--------------|---------|
| 1      | 7.610         | BV   | 0.2310      | 294.36676    | 14.99576     | 1.3172  |
| 2      | 7.940         | VV   | 0.2484      | 2.16302e4    | 1259.08069   | 96.7885 |
| 3      | 9.903         | VB   | 0.2489      | 268.31442    | 12.70510     | 1.2006  |
| 4      | 10.743        | BV   | 0.0781      | 43.19379     | 6.75414      | 0.1933  |
| 5      | 10.884        | VB   | 0.1038      | 111.83592    | 15.94952     | 0.5004  |

Totals : 2.23479e4 1309.48521

Compound: 38

### Method C

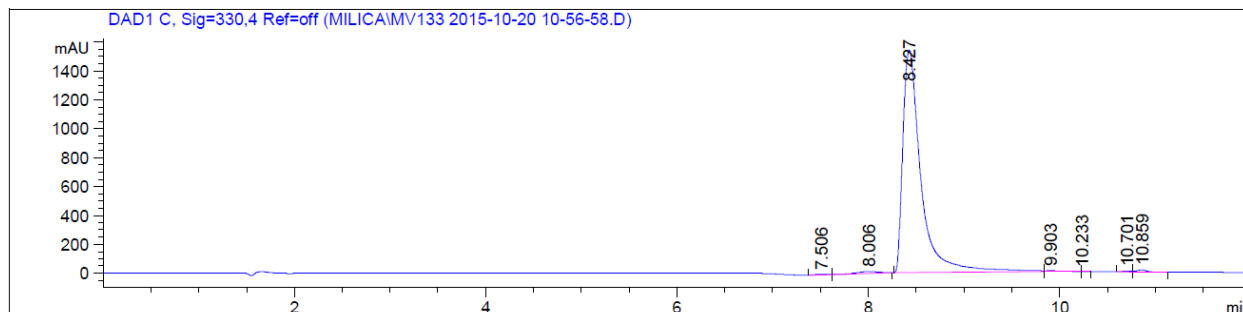

| Peak # | RetTime [min] | Type | Width [min] | Area [mAU*s] | Height [mAU] | Area %   |
|--------|---------------|------|-------------|--------------|--------------|----------|
| 1      | 7.506         | BV   | 0.1035      | 50.68055     | 5.88504      | 0.2439   |
| 2      | 8.006         | VB   | 0.1723      | 195.34010    | 13.86675     | 0.9399   |
| 3      | 8.427         | BV   | 0.1985      | 2.03127e4    | 1538.38354   | 97.7393  |
| 4      | 9.903         | VB   | 0.1387      | 80.54507     | 6.87300      | 0.3876   |
| 5      | 10.233        | BB   | 0.0317      | 4.16970e-1   | 1.72298e-1   | 2.006e-3 |
| 6      | 10.701        | BV   | 0.0792      | 39.33719     | 6.58619      | 0.1893   |
| 7      | 10.859        | VB   | 0.1012      | 103.50700    | 14.16939     | 0.4980   |

Totals : 2.07825e4 1585.93621

### Method D

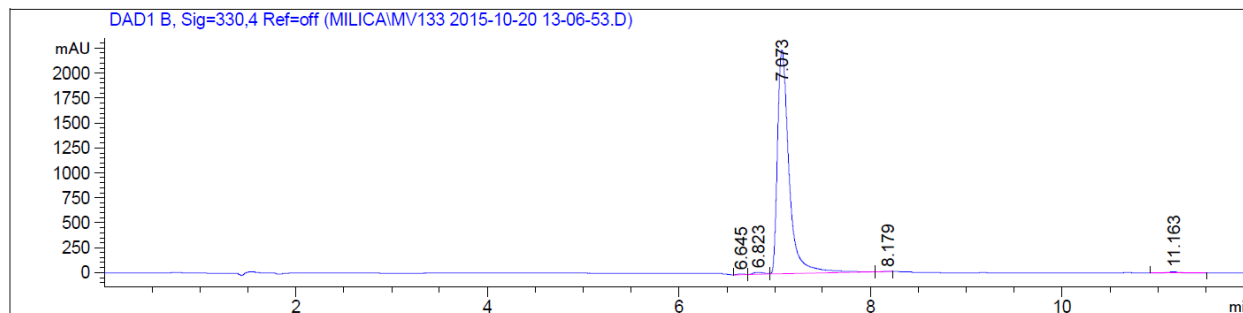

| Peak # | RetTime [min] | Type | Width [min] | Area [mAU*s] | Height [mAU] | Area %  |
|--------|---------------|------|-------------|--------------|--------------|---------|
| 1      | 6.645         | BV   | 0.0760      | 45.04110     | 8.68723      | 0.2325  |
| 2      | 6.823         | VV   | 0.1168      | 178.07773    | 22.88065     | 0.9191  |
| 3      | 7.073         | VV   | 0.1138      | 1.90274e4    | 2247.26343   | 98.2077 |
| 4      | 8.179         | VB   | 0.1417      | 14.16832     | 1.17885      | 0.0731  |
| 5      | 11.163        | BV   | 0.1225      | 109.96989    | 10.87646     | 0.5676  |

Totals : 1.93747e4 2290.88661

## Compound: 39

### Method C

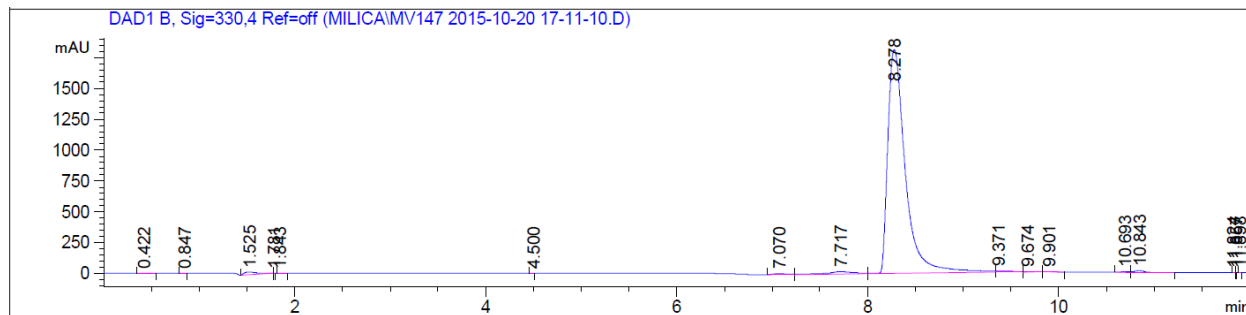

| Peak # | RetTime [min] | Type | Width [min] | Area [mAU*s] | Height [mAU] | Area %   |
|--------|---------------|------|-------------|--------------|--------------|----------|
| 1      | 0.422         | BB   | 0.0611      | 2.82612      | 5.53636e-1   | 0.0117   |
| 2      | 0.847         | BV   | 0.0332      | 2.96316e-1   | 1.09217e-1   | 1.224e-3 |
| 3      | 1.525         | BV   | 0.1431      | 210.84047    | 21.09748     | 0.8713   |
| 4      | 1.781         | VB   | 9.10e-3     | 2.87732e-1   | 4.41475e-1   | 1.189e-3 |
| 5      | 1.843         | BB   | 0.0523      | 1.02715      | 2.35891e-1   | 4.245e-3 |
| 6      | 4.500         | BB   | 0.0206      | 1.37211e-1   | 8.59659e-2   | 5.670e-4 |
| 7      | 7.070         | BV   | 0.1274      | 78.65191     | 8.23348      | 0.3250   |
| 8      | 7.717         | VV   | 0.2327      | 376.93610    | 19.83461     | 1.5576   |
| 9      | 8.278         | VV   | 0.1921      | 2.32117e4    | 1815.73730   | 95.9184  |
| 10     | 9.371         | VV   | 0.1484      | 126.86670    | 10.10944     | 0.5243   |
| 11     | 9.674         | VB   | 0.0869      | 24.97002     | 3.41009      | 0.1032   |
| 12     | 9.901         | BB   | 0.0726      | 14.11047     | 2.34950      | 0.0583   |
| 13     | 10.693        | BV   | 0.0754      | 40.38631     | 6.93634      | 0.1669   |
| 14     | 10.843        | VB   | 0.1015      | 108.59284    | 15.07354     | 0.4487   |
| 15     | 11.824        | BB   | 0.0111      | 1.02296      | 1.31299      | 4.227e-3 |
| 16     | 11.857        | BB   | 5.50e-3     | 1.64866e-1   | 4.80579e-1   | 6.813e-4 |

17 11.898 BB 8.09e-3 6.00064e-1 1.25231 2.480e-3

Totals : 2.41994e4 1907.25384

### Method D

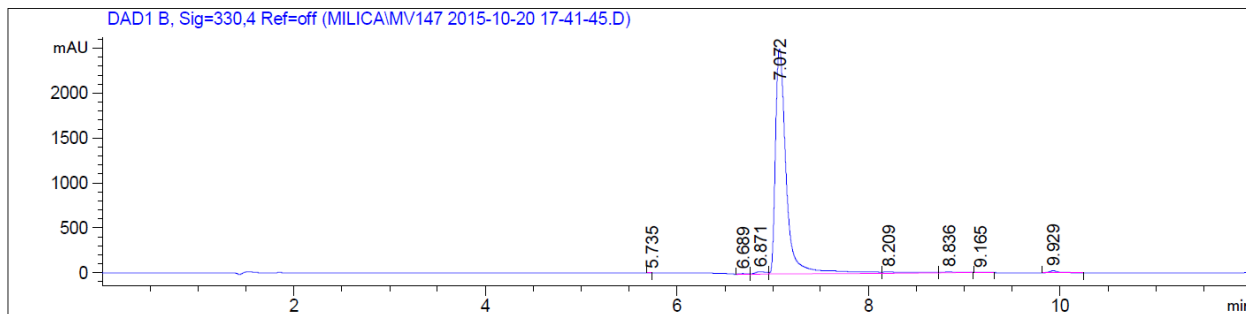

| Peak # | RetTime [min] | Type | Width [min] | Area [mAU*s] | Height [mAU] | Area %   |
|--------|---------------|------|-------------|--------------|--------------|----------|
| 1      | 5.735         | BB   | 0.0240      | 1.07254e-1   | 5.57080e-2   | 5.243e-4 |
| 2      | 6.689         | BV   | 0.0761      | 35.09261     | 6.81063      | 0.1716   |
| 3      | 6.871         | VV   | 0.1151      | 208.44798    | 26.55494     | 1.0190   |
| 4      | 7.072         | VV   | 0.1089      | 1.97024e4    | 2500.60498   | 96.3184  |
| 5      | 8.209         | VV   | 0.2473      | 301.50256    | 14.45508     | 1.4739   |
| 6      | 8.836         | VB   | 0.1063      | 83.81390     | 10.47714     | 0.4097   |
| 7      | 9.165         | BB   | 0.0662      | 1.79404      | 3.28806e-1   | 8.770e-3 |
| 8      | 9.929         | BB   | 0.0911      | 122.33539    | 20.34780     | 0.5981   |

Totals : 2.04555e4 2579.63507

Compound: 40

Method C

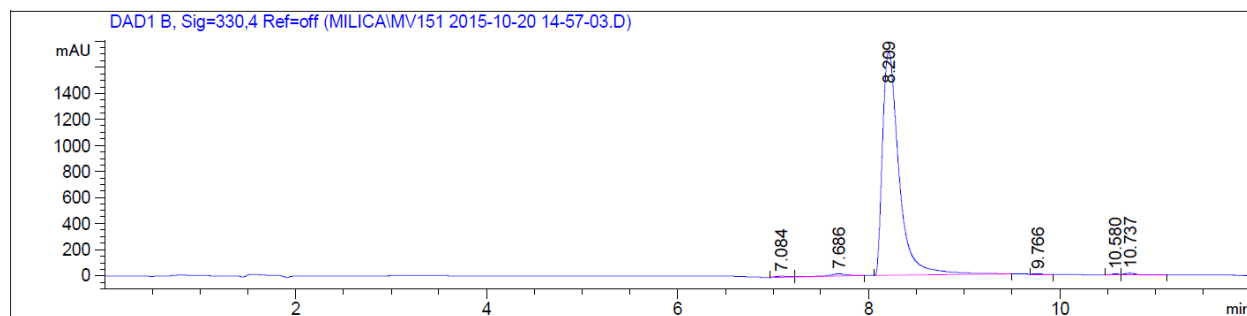

| Peak # | RetTime [min] | Type | Width [min] | Area [mAU*s] | Height [mAU] | Area %  |
|--------|---------------|------|-------------|--------------|--------------|---------|
| 1      | 7.084         | BV   | 0.1096      | 62.42950     | 7.50396      | 0.2966  |
| 2      | 7.686         | VB   | 0.1675      | 196.83829    | 15.10379     | 0.9353  |
| 3      | 8.209         | BB   | 0.1824      | 2.06286e4    | 1714.65063   | 98.0206 |
| 4      | 9.766         | BB   | 0.0717      | 13.48948     | 2.27542      | 0.0641  |
| 5      | 10.580        | BV   | 0.0724      | 39.16399     | 6.53230      | 0.1861  |
| 6      | 10.737        | VB   | 0.1066      | 104.63895    | 14.10237     | 0.4972  |

Totals : 2.10452e4 1760.16847

Method D

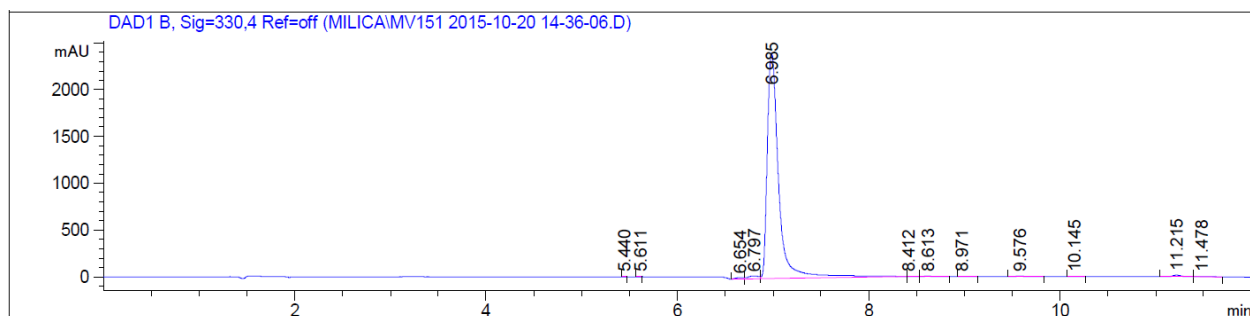

| Peak # | RetTime [min] | Type | Width [min] | Area [mAU*s] | Height [mAU] | Area %   |
|--------|---------------|------|-------------|--------------|--------------|----------|
| 1      | 5.440         | BB   | 0.0218      | 1.00664e-1   | 5.79854e-2   | 4.883e-4 |
| 2      | 5.611         | BB   | 0.0220      | 1.14201e-1   | 6.50129e-2   | 5.540e-4 |
| 3      | 6.654         | BV   | 0.0846      | 87.79340     | 15.84885     | 0.4259   |
| 4      | 6.797         | VV   | 0.1108      | 249.82582    | 32.44704     | 1.2119   |
| 5      | 6.985         | VV   | 0.1246      | 2.00783e4    | 2411.83472   | 97.4014  |
| 6      | 8.412         | VB   | 0.0573      | 12.32068     | 2.66933      | 0.0598   |
| 7      | 8.613         | BB   | 0.0702      | 16.85452     | 2.90565      | 0.0818   |
| 8      | 8.971         | BB   | 0.0790      | 2.19960      | 3.31078e-1   | 0.0107   |
| 9      | 9.576         | BB   | 0.0835      | 41.53010     | 7.01789      | 0.2015   |
| 10     | 10.145        | BB   | 0.0679      | 1.91939      | 3.42590e-1   | 9.311e-3 |
| 11     | 11.215        | BV   | 0.0941      | 113.18070    | 17.94900     | 0.5490   |
| 12     | 11.478        | VB   | 0.0929      | 9.82690      | 1.30380      | 0.0477   |

Totals : 2.06140e4 2492.77293



Compound: 41

Method A

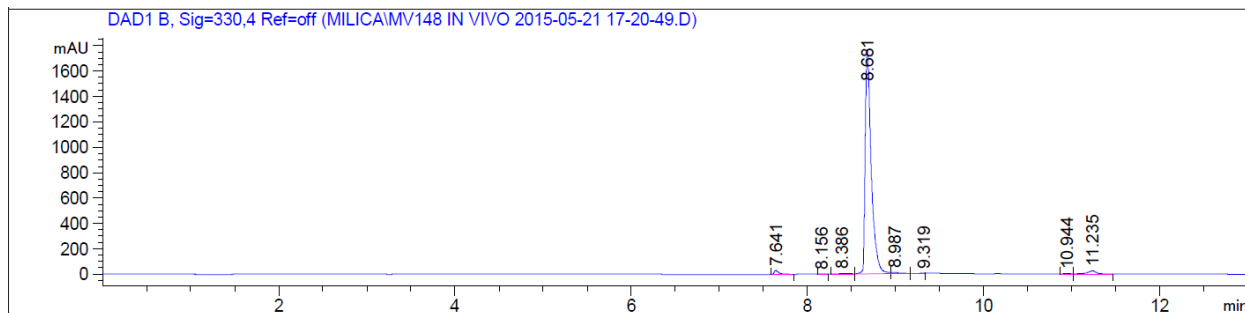

| Peak # | RetTime [min] | Type | Width [min] | Area [mAU*s] | Height [mAU] | Area %  |
|--------|---------------|------|-------------|--------------|--------------|---------|
| 1      | 7.641         | BB   | 0.0501      | 108.00912    | 31.43413     | 1.2242  |
| 2      | 8.156         | BB   | 0.0447      | 7.95650      | 2.36894      | 0.0902  |
| 3      | 8.386         | BB   | 0.0794      | 23.89058     | 3.93031      | 0.2708  |
| 4      | 8.681         | BV   | 0.0716      | 8400.87695   | 1764.00928   | 95.2194 |
| 5      | 8.987         | VB   | 0.0910      | 65.83261     | 10.30554     | 0.7462  |
| 6      | 9.319         | BV   | 0.0675      | 17.72163     | 3.39033      | 0.2009  |
| 7      | 10.944        | VV   | 0.0625      | 19.06977     | 3.70876      | 0.2161  |
| 8      | 11.235        | VB   | 0.1043      | 179.29144    | 24.67681     | 2.0322  |

Totals : 8822.64861 1843.82410

Method B

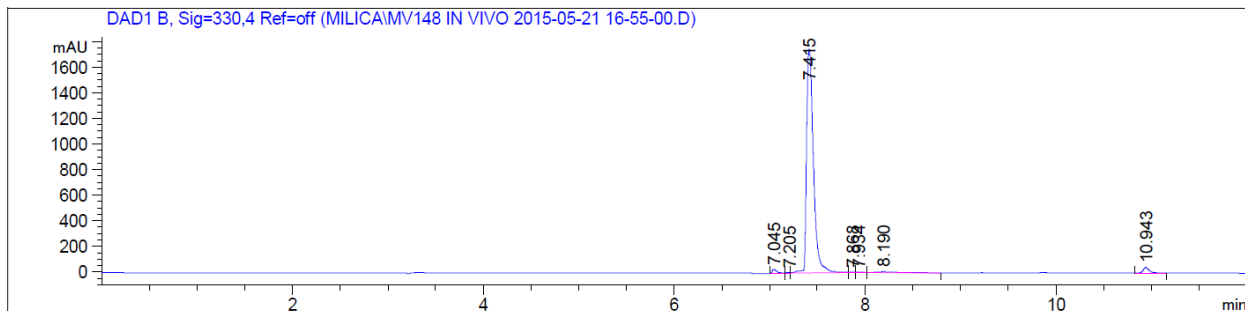

| Peak # | RetTime [min] | Type | Width [min] | Area [mAU*s] | Height [mAU] | Area %  |
|--------|---------------|------|-------------|--------------|--------------|---------|
| 1      | 7.045         | BB   | 0.0501      | 93.71075     | 29.83362     | 1.0323  |
| 2      | 7.205         | BV   | 0.0317      | 6.64790      | 2.70537      | 0.0732  |
| 3      | 7.415         | VV   | 0.0774      | 8691.20410   | 1751.03418   | 95.7429 |
| 4      | 7.868         | VV   | 0.0573      | 15.86938     | 3.61076      | 0.1748  |
| 5      | 7.934         | VB   | 0.0522      | 14.12953     | 3.57062      | 0.1557  |
| 6      | 8.190         | BB   | 0.1407      | 69.97594     | 6.39396      | 0.7709  |
| 7      | 10.943        | BV   | 0.0652      | 186.11200    | 42.81100     | 2.0502  |

Totals : 9077.64961 1839.95951

Compound: 42

Method D

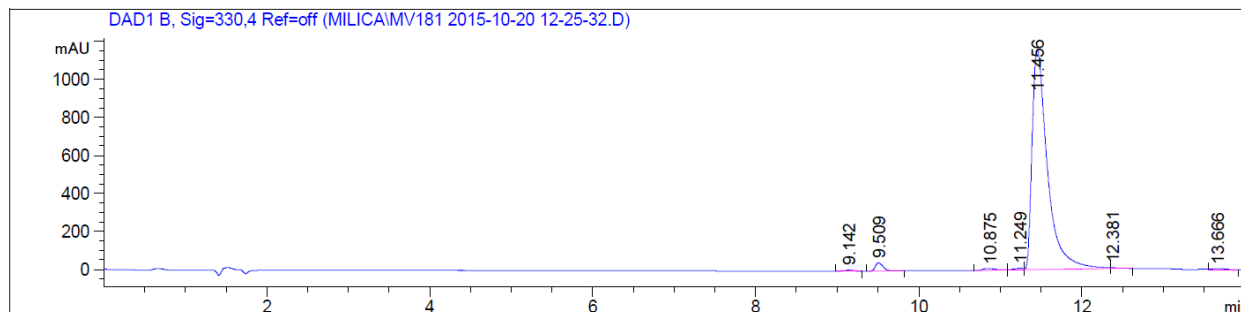

| Peak # | RetTime [min] | Type | Width [min] | Area [mAU*s] | Height [mAU] | Area %  |
|--------|---------------|------|-------------|--------------|--------------|---------|
| 1      | 9.142         | BB   | 0.0884      | 40.84436     | 6.54013      | 0.2585  |
| 2      | 9.509         | BB   | 0.1027      | 281.94089    | 42.63459     | 1.7841  |
| 3      | 10.875        | BB   | 0.1335      | 88.58769     | 8.10531      | 0.5606  |
| 4      | 11.249        | BV   | 0.0864      | 51.77385     | 7.37327      | 0.3276  |
| 5      | 11.456        | VV   | 0.1951      | 1.52084e4    | 1155.23315   | 96.2378 |
| 6      | 12.381        | VV   | 0.1265      | 59.23616     | 5.57472      | 0.3748  |
| 7      | 13.666        | VB   | 0.1326      | 72.15301     | 6.42168      | 0.4566  |

Totals : 1.58030e4 1231.88284

Method G

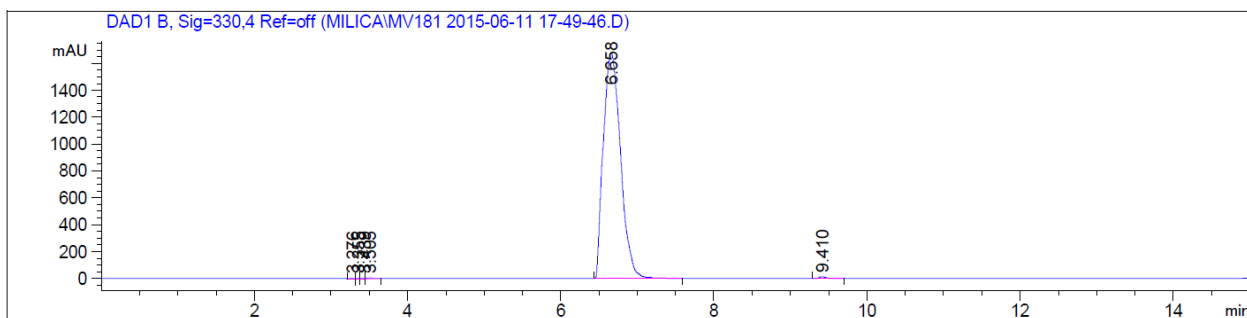

| Peak # | RetTime [min] | Type | Width [min] | Area [mAU*s] | Height [mAU] | Area %  |
|--------|---------------|------|-------------|--------------|--------------|---------|
| 1      | 3.276         | BB   | 0.0565      | 16.32383     | 4.95032      | 0.0619  |
| 2      | 3.355         | BV   | 0.0352      | 7.34878      | 3.20923      | 0.0279  |
| 3      | 3.439         | VV   | 0.0529      | 16.47764     | 4.18833      | 0.0625  |
| 4      | 3.505         | VB   | 0.0779      | 29.29096     | 4.47131      | 0.1111  |
| 5      | 6.658         | BB   | 0.2200      | 2.62094e4    | 1680.20728   | 99.4388 |
| 6      | 9.410         | BB   | 0.0876      | 78.48502     | 13.65381     | 0.2978  |

Totals : 2.63574e4 1710.68028

Compound: 43

### Method C

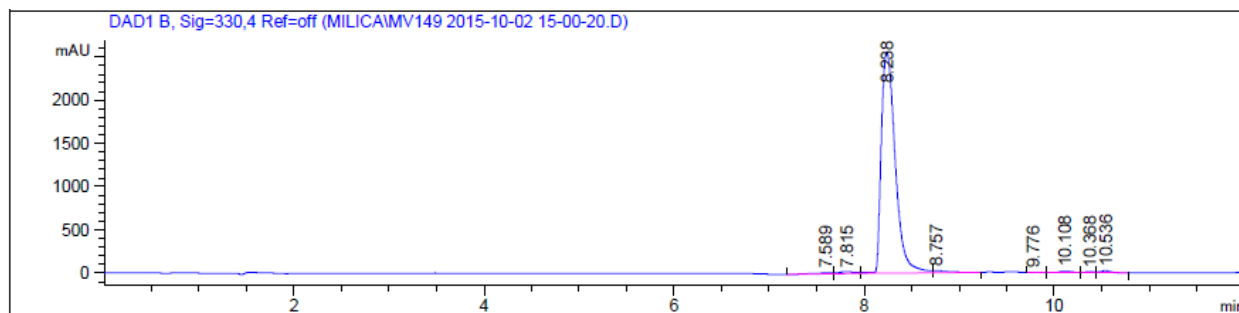

| Peak # | RetTime [min] | Type | Width [min] | Area [mAU*s] | Height [mAU] | Area %  |
|--------|---------------|------|-------------|--------------|--------------|---------|
| 1      | 7.589         | BV   | 0.1793      | 157.24036    | 10.37813     | 0.5796  |
| 2      | 7.815         | VV   | 0.1532      | 260.49203    | 21.51618     | 0.9601  |
| 3      | 8.238         | VV   | 0.1220      | 2.61074e4    | 2558.75122   | 96.2292 |
| 4      | 8.757         | VB   | 0.1324      | 259.51468    | 23.12087     | 0.9565  |
| 5      | 9.776         | VB   | 0.0797      | 16.24070     | 2.52059      | 0.0599  |
| 6      | 10.108        | BB   | 0.1147      | 128.51112    | 16.34383     | 0.4737  |
| 7      | 10.368        | BV   | 0.0879      | 49.34284     | 8.17360      | 0.1819  |
| 8      | 10.536        | VB   | 0.1040      | 151.68288    | 21.44783     | 0.5591  |

Totals : 2.71304e4 2662.25225

### Method D

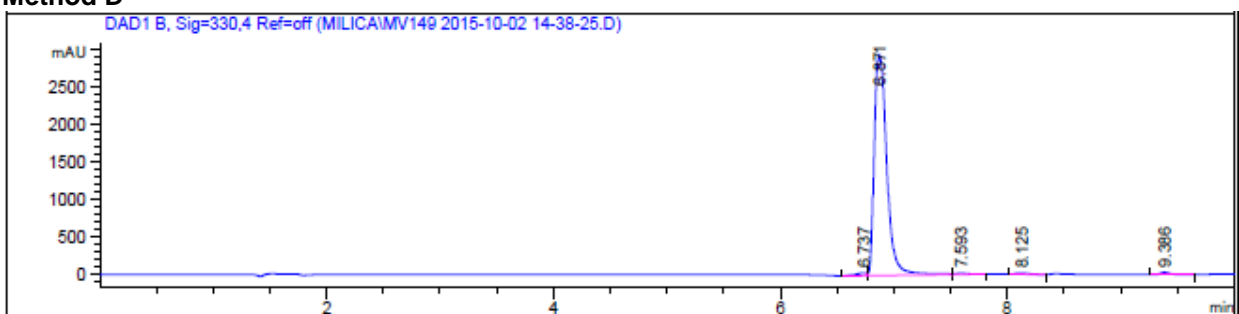

| Peak # | RetTime [min] | Type | Width [min] | Area [mAU*s] | Height [mAU] | Area %  |
|--------|---------------|------|-------------|--------------|--------------|---------|
| 1      | 6.737         | BV   | 0.0964      | 243.48349    | 37.20078     | 1.0436  |
| 2      | 6.871         | VV   | 0.0929      | 2.26023e4    | 2934.04883   | 96.8746 |
| 3      | 7.593         | VB   | 0.1159      | 150.26065    | 17.89824     | 0.6440  |
| 4      | 8.125         | BB   | 0.1069      | 146.13326    | 20.19939     | 0.6263  |
| 5      | 9.386         | BV   | 0.0844      | 189.32347    | 34.30740     | 0.8115  |

Totals : 2.33315e4 3043.65464

Compound: 44

Method A

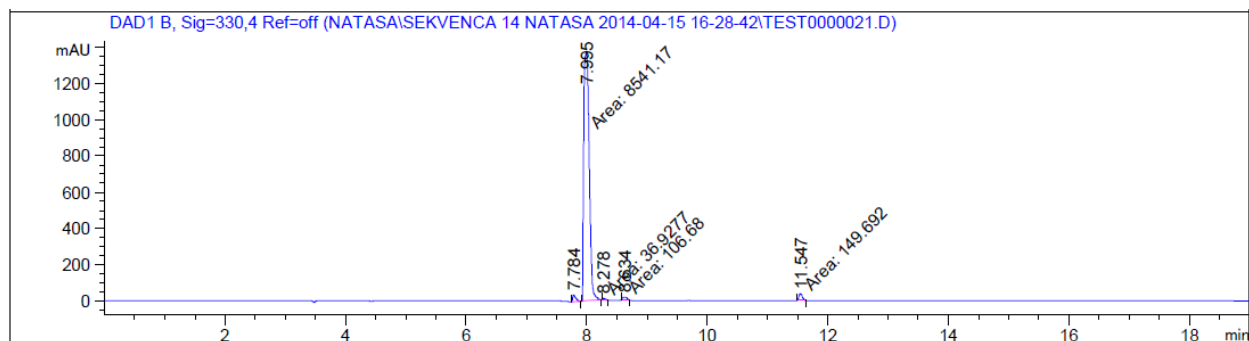

| Peak # | RetTime [min] | Type | Width [min] | Area [mAU*s] | Height [mAU] | Area %  |
|--------|---------------|------|-------------|--------------|--------------|---------|
| 1      | 7.784         | BB   | 0.0549      | 137.49791    | 36.94980     | 1.5325  |
| 2      | 7.995         | MM   | 0.1044      | 8541.16699   | 1363.20300   | 95.1984 |
| 3      | 8.278         | MM   | 0.0676      | 36.92768     | 9.09978      | 0.4116  |
| 4      | 8.634         | MM   | 0.0909      | 106.68042    | 19.57051     | 1.1890  |
| 5      | 11.547        | MM   | 0.0657      | 149.69228    | 37.99706     | 1.6684  |

Totals : 8971.96528 1466.82016

Method B

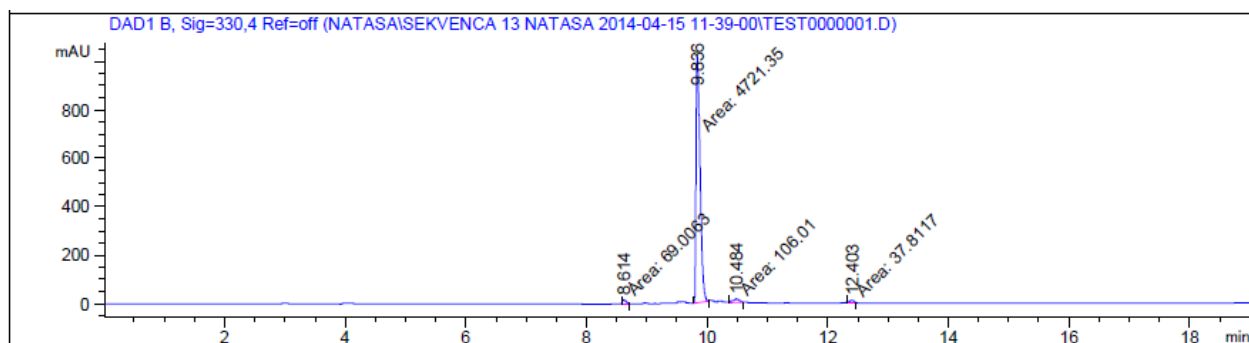

| Peak # | RetTime [min] | Type | Width [min] | Area [mAU*s] | Height [mAU] | Area %  |
|--------|---------------|------|-------------|--------------|--------------|---------|
| 1      | 8.614         | MM   | 0.0698      | 69.00631     | 16.48519     | 1.3985  |
| 2      | 9.836         | MM   | 0.0770      | 4721.34766   | 1021.60065   | 95.6867 |
| 3      | 10.484        | MM   | 0.1201      | 106.00954    | 14.70533     | 2.1485  |
| 4      | 12.403        | MM   | 0.0679      | 37.81166     | 9.28764      | 0.7663  |

Totals : 4934.17516 1062.07880

Compound: 46

Method I

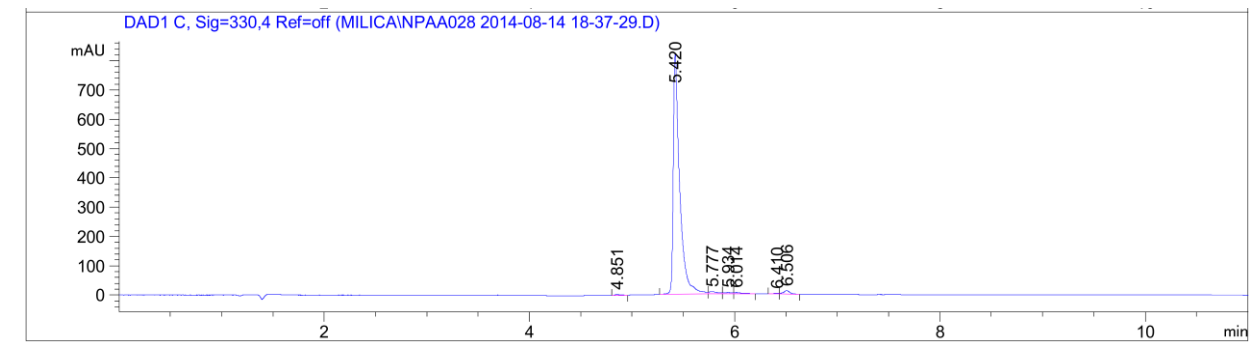

| Peak # | RetTime [min] | Type | Width [min] | Area [mAU*s] | Height [mAU] | Area %  |
|--------|---------------|------|-------------|--------------|--------------|---------|
| 1      | 4.851         | BB   | 0.0531      | 11.55937     | 3.20699      | 0.3092  |
| 2      | 5.420         | BV   | 0.0611      | 3560.69458   | 821.58832    | 95.2354 |
| 3      | 5.777         | VV   | 0.0796      | 51.85744     | 8.28047      | 1.3870  |
| 4      | 5.934         | VV   | 0.0744      | 28.90337     | 4.86178      | 0.7731  |
| 5      | 6.014         | VB   | 0.0706      | 25.86342     | 4.70832      | 0.6918  |
| 6      | 6.410         | BV   | 0.0422      | 9.21101      | 2.64298      | 0.2464  |
| 7      | 6.506         | VB   | 0.0626      | 50.74789     | 11.81134     | 1.3573  |

Totals : 3738.83708 857.10019

Method H

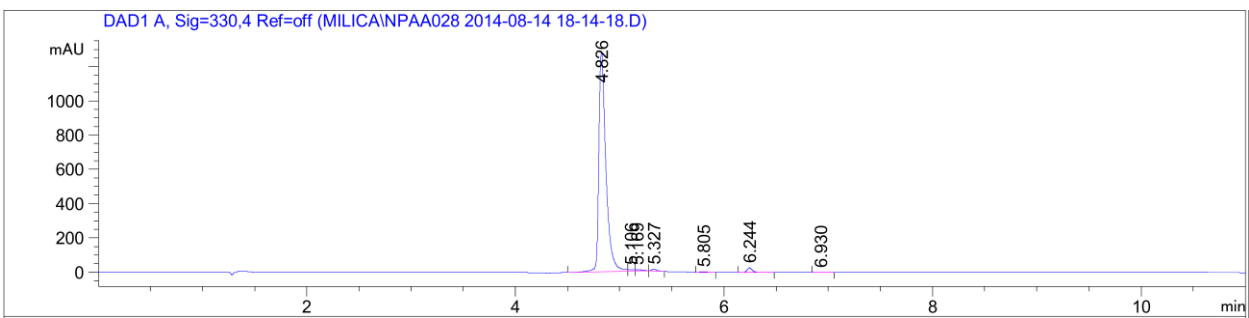

| Peak # | RetTime [min] | Type | Width [min] | Area [mAU*s] | Height [mAU] | Area %  |
|--------|---------------|------|-------------|--------------|--------------|---------|
| 1      | 4.826         | BV   | 0.0704      | 6058.60107   | 1287.40662   | 96.5369 |
| 2      | 5.106         | VV   | 0.0529      | 37.04706     | 9.40642      | 0.5903  |
| 3      | 5.169         | VB   | 0.0597      | 33.36654     | 7.67828      | 0.5317  |
| 4      | 5.327         | BB   | 0.0535      | 34.47512     | 9.93727      | 0.5493  |
| 5      | 5.805         | BB   | 0.0698      | 11.68613     | 2.42034      | 0.1862  |
| 6      | 6.244         | BB   | 0.0532      | 94.46011     | 26.75001     | 1.5051  |
| 7      | 6.930         | BB   | 0.0577      | 6.30531      | 1.52711      | 0.1005  |

Totals : 6275.94134 1345.12604

**Compound: 52****Method A**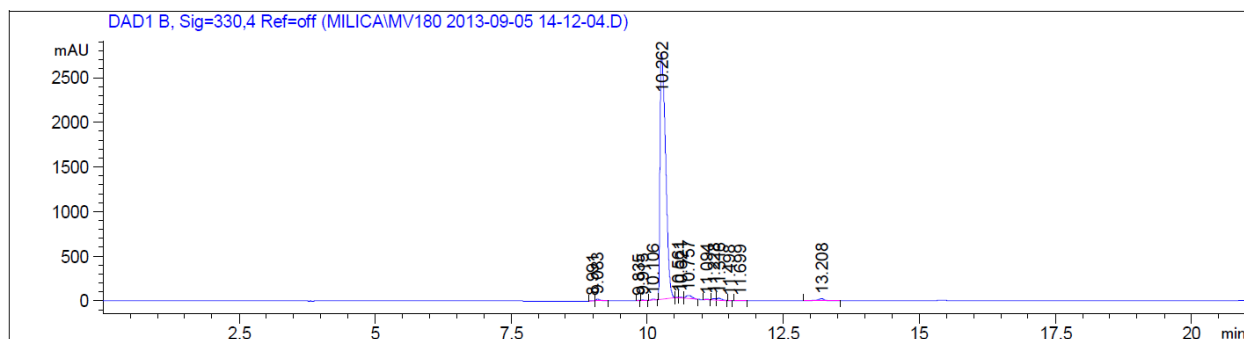

| Peak # | RetTime [min] | Type | Width [min] | Area [mAU*s] | Height [mAU] | Area %   |
|--------|---------------|------|-------------|--------------|--------------|----------|
| 1      | 8.991         | BV   | 0.0582      | 19.20522     | 4.90571      | 0.0934   |
| 2      | 9.083         | VV   | 0.0714      | 116.13204    | 22.98373     | 0.5646   |
| 3      | 9.835         | BB   | 0.0425      | 4.62732      | 1.79770      | 0.0225   |
| 4      | 9.915         | BB   | 0.0548      | 23.58116     | 6.28665      | 0.1146   |
| 5      | 10.106        | BB   | 0.0674      | 52.62742     | 11.61486     | 0.2559   |
| 6      | 10.262        | BB   | 0.0970      | 1.96133e4    | 2758.01270   | 95.3572  |
| 7      | 10.561        | BV   | 0.0388      | 20.52732     | 8.47703      | 0.0998   |
| 8      | 10.621        | VB   | 0.0609      | 40.19218     | 9.69200      | 0.1954   |
| 9      | 10.757        | BB   | 0.1171      | 245.83640    | 34.52837     | 1.1952   |
| 10     | 11.094        | BB   | 0.0684      | 29.20466     | 7.04172      | 0.1420   |
| 11     | 11.228        | BV   | 0.0688      | 64.26157     | 15.21992     | 0.3124   |
| 12     | 11.316        | VB   | 0.0799      | 124.99713    | 22.99112     | 0.6077   |
| 13     | 11.498        | BB   | 0.0396      | 1.01013      | 3.78477e-1   | 4.911e-3 |
| 14     | 11.699        | BB   | 0.0980      | 6.47267      | 7.94974e-1   | 0.0315   |
| 15     | 13.208        | BB   | 0.1227      | 206.26627    | 23.21161     | 1.0028   |

Totals : 2.05683e4 2927.93657

**Method B**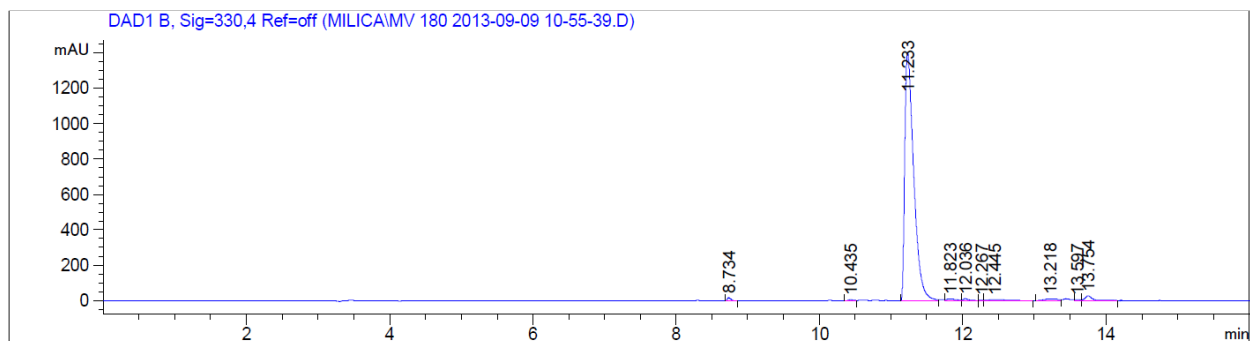

| Peak # | RetTime [min] | Type | Width [min] | Area [mAU*s] | Height [mAU] | Area %  |
|--------|---------------|------|-------------|--------------|--------------|---------|
| 1      | 8.734         | BB   | 0.0510      | 59.07262     | 17.68832     | 0.4644  |
| 2      | 10.435        | BV   | 0.0698      | 26.55964     | 5.60821      | 0.2088  |
| 3      | 11.233        | BV   | 0.1304      | 1.21063e4    | 1399.71387   | 95.1654 |
| 4      | 11.823        | VV   | 0.1312      | 79.11050     | 8.72864      | 0.6219  |
| 5      | 12.036        | VB   | 0.0730      | 48.03447     | 9.75311      | 0.3776  |
| 6      | 12.267        | BV   | 0.0489      | 3.74937      | 1.20084      | 0.0295  |
| 7      | 12.445        | VB   | 0.1986      | 94.13501     | 6.09839      | 0.7400  |
| 8      | 13.218        | BV   | 0.1745      | 111.99912    | 7.59500      | 0.8804  |
| 9      | 13.597        | VV   | 0.0710      | 23.11556     | 4.49778      | 0.1817  |
| 10     | 13.754        | VB   | 0.0932      | 169.25041    | 26.26011     | 1.3304  |

Totals : 1.27213e4 1487.14425
